# Supplementary material
Source: PubMed Central journal article supplement (PMC4243339)
Supplement: ASN.2013050446_ASN2013050446SupplementaryData1.pdf [file ASN.2013050446_ASN2013050446SupplementaryData1.pdf]

## Lupus Nephritis Susceptibility Loci in Women with Systemic Lupus Erythematosus

\*Sharon A. Chung,<sup>1</sup> \*Elizabeth E. Brown,<sup>2,3</sup> Adrienne H. Williams,<sup>4</sup> Paula S. Ramos,<sup>5</sup> Celine C. Berthier,<sup>6</sup> Tushar Bhangale,<sup>7</sup> Marta E. Alarcon-Riquelme,<sup>8,9</sup> Timothy W. Behrens,<sup>10</sup> Lindsey A. Criswell,<sup>1</sup> Deborah Cunninghame Graham,<sup>11</sup> F. Yesim Demirci,<sup>12</sup> Jeffrey C. Edberg,<sup>3</sup> Patrick M. Gaffney,<sup>8</sup> John B. Harley,<sup>8,13,14,15</sup> Chaim O. Jacob,<sup>16</sup> M. Ilyas Kamboh,<sup>12</sup> Jennifer A. Kelly,<sup>8</sup> Susan Manzi,<sup>17,18</sup> Kathy L. Moser-Sivils,<sup>8,19</sup> Laurie P. Russell,<sup>4</sup> Michelle Petri,<sup>20</sup> Betty P. Tsao,<sup>21</sup> Tim J. Vyse,<sup>11</sup> Raphael Zidovetzki,<sup>22</sup> Matthias Kretzler,<sup>6</sup> Robert P. Kimberly,<sup>3</sup> Barry I. Freedman,<sup>23</sup> Robert R. Graham,<sup>10</sup> Carl D. Langefeld,<sup>4</sup> for the International Consortium for Systemic Lupus Erythematosus Genetics (SLEGEN)

\* Co-First Authors

Corresponding author

Carl D. Langefeld, Department of Biostatistical Sciences, Division of Public Health Sciences, Wake Forest School of Medicine, Winston-Salem, NC 27157,

E-mail: clangefe@wakehealth.edu

Phone: 336.713.0013

**Running title:** GWAS of Lupus Nephritis in SLE

**Key words:** lupus nephritis, systemic lupus erythematosus, glomerulonephritis, renal, genetics, GWAS

Supplemental Figure 1: PP-plot for the lupus nephritis genome-wide association study (best p-value before genomic control adjustment)

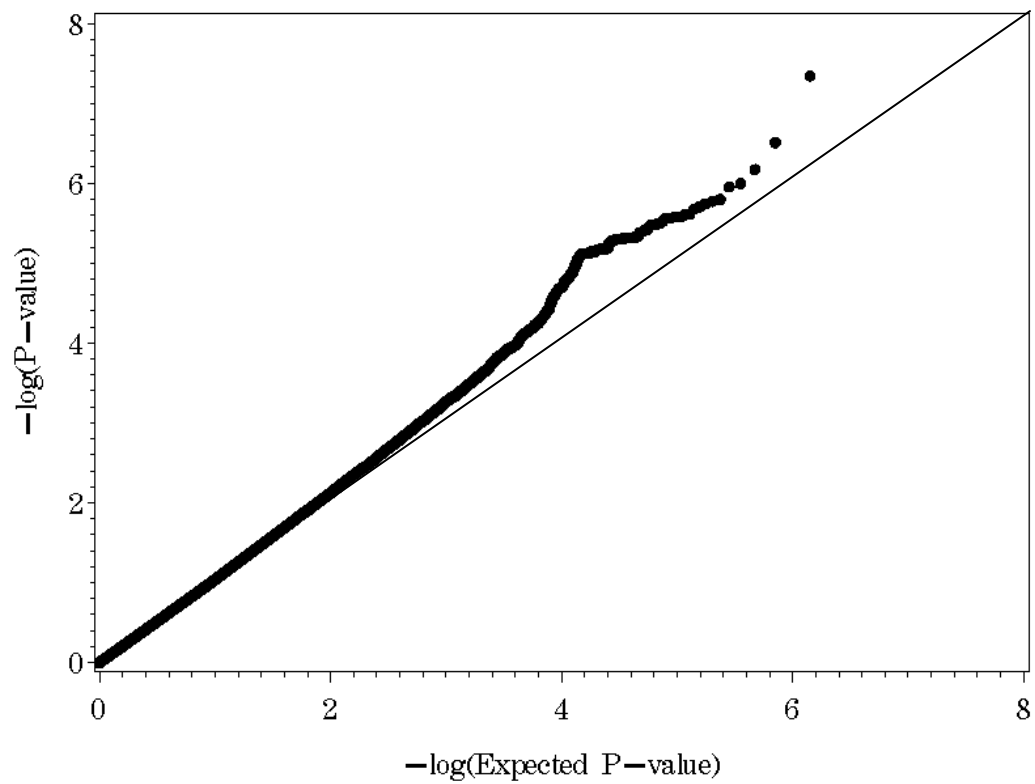

Supplemental Figure S2: Power analysis for the 588 LN cases versus 1,412 SLE cases without nephritis over a range of allele frequencies, additive model and at type 1 error rates of a)  $\alpha=5 \times 10^{-8}$  and b)  $5 \times 10^{-8}$

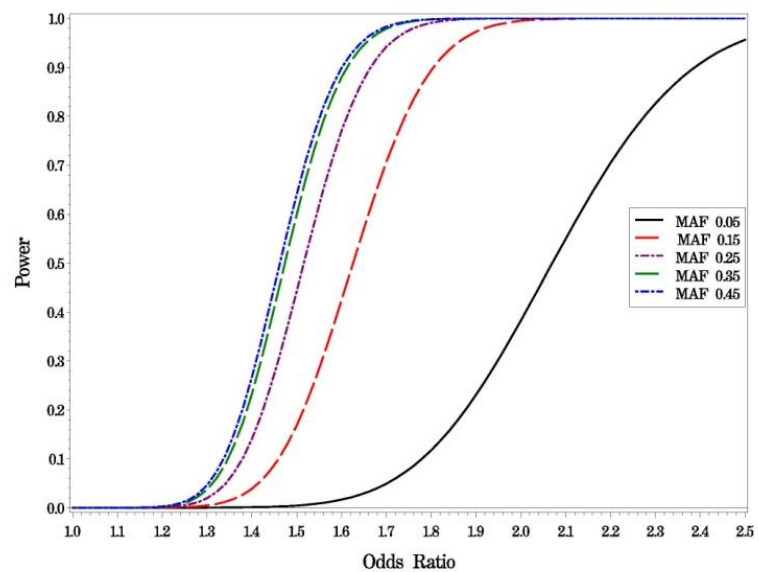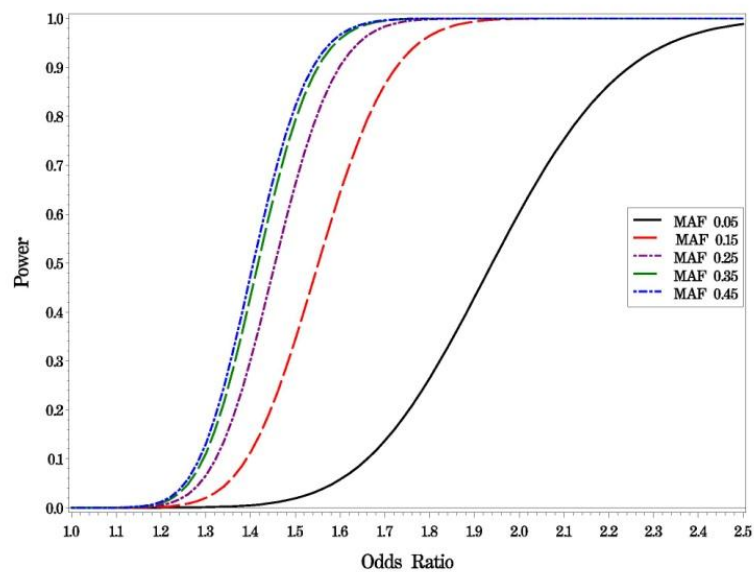

Supplemental Table S1. Top additive genetic model associations ( $P < 10^{-5}$ ) for lupus nephritis (LN) contrasting LN cases with lupus cases without nephritis.

| MARKER     | CHR | POSITION  | GENE   | RA | N    | Meta Add P-value | Meta OR (95% CI) | Set I P-value | Set I OR (95% CI) | Set II P-value | Set II OR (95% CI) | Set III P-value | Set III OR (95% CI) |
|------------|-----|-----------|--------|----|------|------------------|------------------|---------------|-------------------|----------------|--------------------|-----------------|---------------------|
| rs8012283  | 14  | 50303910  | NIN    | G  | 1807 | 3.10E-07         | 1.64 (1.35,1.98) | 3.31E-05      | 1.68 (1.31,2.14)  | 2.70E-03       | 1.59 (1.17,2.14)   |                 |                     |
| rs8015968  | 14  | 50308509  | NIN    | A  | 1799 | 1.11E-06         | 1.72 (1.38,2.15) | 2.56E-05      | 1.85 (1.39,2.46)  | 1.18E-02       | 1.57 (1.11,2.23)   |                 |                     |
| rs9275596  | 6   | 32789609  |        | C  | 1911 | 1.18E-06         | 1.48 (1.28,1.72) | 2.37E-03      | 1.35 (1.11,1.64)  | 2.80E-03       | 1.45 (1.14,1.85)   | 3.55E-03        | 2.02 (1.26,3.25)    |
| rs6910773  | 6   | 19928637  |        | C  | 1826 | 1.59E-06         | 0.66 (0.56,0.78) | 2.23E-03      | 0.72 (0.58,0.89)  | 9.82E-05       | 0.59 (0.46,0.77)   |                 |                     |
| rs967616   | 4   | 172262952 |        | G  | 1920 | 1.68E-06         | 0.69 (0.59,0.81) | 4.60E-05      | 0.66 (0.55,0.81)  | 2.97E-02       | 0.74 (0.57,0.97)   | 1.25E-01        | 0.67 (0.4,1.12)     |
| rs6936204  | 6   | 32325070  |        | T  | 1950 | 1.72E-06         | 1.46 (1.26,1.69) | 1.68E-03      | 1.36 (1.12,1.65)  | 6.93E-03       | 1.38 (1.09,1.75)   | 3.46E-03        | 1.99 (1.26,3.16)    |
| rs6538678  | 12  | 94764036  | CCDC38 | A  | 1832 | 1.96E-06         | 1.57 (1.3,1.88)  | 3.06E-04      | 1.52 (1.21,1.91)  | 1.87E-03       | 1.63 (1.2,2.21)    |                 |                     |
| rs9267972  | 6   | 32325210  |        | A  | 1911 | 2.08E-06         | 1.46 (1.26,1.69) | 2.09E-03      | 1.35 (1.12,1.64)  | 4.99E-03       | 1.41 (1.11,1.78)   | 5.67E-03        | 1.95 (1.22,3.14)    |
| rs752010   | 1   | 41865602  | HIVEP3 | C  | 1932 | 2.62E-06         | 0.71 (0.61,0.82) | 1.51E-04      | 0.7 (0.58,0.84)   | 2.79E-02       | 0.76 (0.6,0.97)    | 5.56E-02        | 0.61 (0.37,1.01)    |
| rs6664724  | 1   | 41762914  | HIVEP3 | G  | 1892 | 2.74E-06         | 0.71 (0.61,0.82) | 1.58E-04      | 0.7 (0.58,0.84)   | 2.77E-02       | 0.76 (0.6,0.97)    | 5.59E-02        | 0.61 (0.37,1.01)    |
| rs2077172  | 1   | 41865927  | HIVEP3 | A  | 1932 | 3.01E-06         | 0.71 (0.61,0.82) | 1.76E-04      | 0.7 (0.58,0.84)   | 2.79E-02       | 0.76 (0.6,0.97)    | 5.58E-02        | 0.61 (0.37,1.01)    |
| rs7773456  | 6   | 19931217  |        | G  | 1743 | 3.22E-06         | 0.68 (0.57,0.8)  | 1.06E-03      | 0.7 (0.57,0.87)   | 7.20E-04       | 0.64 (0.5,0.83)    |                 |                     |
| rs12206194 | 6   | 19927887  |        | C  | 1845 | 3.80E-06         | 0.65 (0.54,0.78) | 8.08E-04      | 0.67 (0.52,0.84)  | 1.26E-03       | 0.63 (0.48,0.83)   |                 |                     |
| rs2038978  | 1   | 41867306  | HIVEP3 | A  | 1950 | 3.80E-06         | 0.71 (0.61,0.82) | 2.35E-04      | 0.71 (0.59,0.85)  | 2.72E-02       | 0.76 (0.6,0.97)    | 5.60E-02        | 0.61 (0.37,1.01)    |
| rs9368127  | 6   | 19919970  |        | A  | 1821 | 4.11E-06         | 0.65 (0.54,0.78) | 7.85E-04      | 0.67 (0.53,0.84)  | 1.41E-03       | 0.63 (0.48,0.84)   |                 |                     |
| rs9350190  | 6   | 19919639  |        | G  | 1820 | 4.17E-06         | 0.65 (0.54,0.78) | 7.94E-04      | 0.67 (0.53,0.84)  | 1.42E-03       | 0.63 (0.48,0.84)   |                 |                     |
| rs13139444 | 4   | 172127251 |        | A  | 1964 | 4.64E-06         | 0.7 (0.6,0.82)   | 1.29E-04      | 0.68 (0.56,0.83)  | 3.71E-02       | 0.75 (0.58,0.98)   | 1.07E-01        | 0.65 (0.39,1.1)     |
| rs2567952  | 4   | 172129725 |        | C  | 1964 | 4.74E-06         | 0.7 (0.6,0.82)   | 1.32E-04      | 0.68 (0.56,0.83)  | 3.71E-02       | 0.75 (0.58,0.98)   | 1.07E-01        | 0.65 (0.39,1.1)     |
| rs2661917  | 4   | 172129968 |        | C  | 1964 | 4.74E-06         | 0.7 (0.6,0.82)   | 1.32E-04      | 0.68 (0.56,0.83)  | 3.71E-02       | 0.75 (0.58,0.98)   | 1.07E-01        | 0.65 (0.39,1.1)     |
| rs2661923  | 4   | 172127242 |        | C  | 1981 | 4.78E-06         | 0.7 (0.6,0.82)   | 1.46E-04      | 0.68 (0.56,0.83)  | 2.91E-02       | 0.74 (0.57,0.97)   | 1.46E-01        | 0.68 (0.4,1.14)     |
| rs2567956  | 4   | 172126317 |        | C  | 1993 | 4.79E-06         | 0.7 (0.6,0.83)   | 1.33E-04      | 0.68 (0.56,0.83)  | 2.87E-02       | 0.74 (0.57,0.97)   | 1.68E-01        | 0.69 (0.41,1.17)    |
| rs1236448  | 4   | 172118655 |        | C  | 1993 | 4.79E-06         | 0.7 (0.6,0.83)   | 1.33E-04      | 0.68 (0.56,0.83)  | 2.87E-02       | 0.74 (0.57,0.97)   | 1.68E-01        | 0.69 (0.41,1.17)    |
| rs17245674 | 4   | 172259440 |        | A  | 1993 | 4.79E-06         | 0.7 (0.6,0.83)   | 1.33E-04      | 0.68 (0.56,0.83)  | 2.87E-02       | 0.74 (0.57,0.97)   | 1.68E-01        | 0.69 (0.41,1.17)    |
| rs2567960  | 4   | 172122108 |        | T  | 1992 | 4.80E-06         | 0.7 (0.6,0.83)   | 1.33E-04      | 0.68 (0.56,0.83)  | 2.87E-02       | 0.74 (0.57,0.97)   | 1.68E-01        | 0.69 (0.41,1.17)    |

|            |    |           |              |   |      |          |                  |          |                  |          |                  |          |                  |
|------------|----|-----------|--------------|---|------|----------|------------------|----------|------------------|----------|------------------|----------|------------------|
| rs17186543 | 4  | 172126746 |              | T | 1993 | 4.80E-06 | 0.7 (0.6,0.83)   | 1.33E-04 | 0.68 (0.56,0.83) | 2.88E-02 | 0.74 (0.57,0.97) | 1.68E-01 | 0.69 (0.41,1.17) |
| rs9469220  | 6  | 32766288  |              | A | 1935 | 4.87E-06 | 0.7 (0.6,0.81)   | 4.30E-03 | 0.76 (0.62,0.92) | 1.18E-03 | 0.66 (0.51,0.85) | 6.71E-02 | 0.63 (0.39,1.03) |
| rs12331863 | 4  | 172133772 |              | G | 1981 | 4.90E-06 | 0.7 (0.6,0.82)   | 1.51E-04 | 0.68 (0.56,0.83) | 2.91E-02 | 0.74 (0.57,0.97) | 1.45E-01 | 0.68 (0.4,1.14)  |
| rs13041255 | 20 | 21078707  | PLK1S1       | T | 1999 | 4.95E-06 | 0.69 (0.59,0.8)  | 8.75E-04 | 0.72 (0.59,0.87) | 4.68E-02 | 0.78 (0.61,1)    | 1.53E-03 | 0.45 (0.28,0.74) |
| rs4813414  | 20 | 21081212  | PLK1S1       | A | 1999 | 4.95E-06 | 0.69 (0.59,0.8)  | 8.75E-04 | 0.72 (0.59,0.87) | 4.68E-02 | 0.78 (0.61,1)    | 1.53E-03 | 0.45 (0.28,0.74) |
| rs4815022  | 20 | 21072872  | PLK1S1       | T | 1999 | 4.95E-06 | 0.68 (0.59,0.8)  | 8.76E-04 | 0.72 (0.59,0.87) | 4.68E-02 | 0.78 (0.61,1)    | 1.53E-03 | 0.45 (0.28,0.74) |
| rs6047274  | 20 | 21083126  | PLK1S1       | T | 1998 | 4.96E-06 | 0.69 (0.59,0.8)  | 8.77E-04 | 0.72 (0.59,0.87) | 4.68E-02 | 0.78 (0.61,1)    | 1.53E-03 | 0.45 (0.28,0.74) |
| rs1884763  | 20 | 21076127  | PLK1S1       | A | 1999 | 4.96E-06 | 0.69 (0.59,0.8)  | 8.78E-04 | 0.72 (0.59,0.87) | 4.68E-02 | 0.78 (0.61,1)    | 1.53E-03 | 0.45 (0.28,0.74) |
| rs3762194  | 20 | 21074723  | PLK1S1       | A | 1999 | 4.99E-06 | 0.69 (0.59,0.8)  | 8.82E-04 | 0.72 (0.59,0.87) | 4.68E-02 | 0.78 (0.61,1)    | 1.53E-03 | 0.45 (0.28,0.74) |
| rs4815024  | 20 | 21086367  | PLK1S1       | C | 1997 | 5.11E-06 | 0.69 (0.59,0.8)  | 9.03E-04 | 0.72 (0.59,0.87) | 4.68E-02 | 0.78 (0.61,1)    | 1.53E-03 | 0.45 (0.28,0.74) |
| rs2093069  | 20 | 21088342  | PLK1S1       | C | 1997 | 5.20E-06 | 0.69 (0.59,0.8)  | 9.19E-04 | 0.72 (0.59,0.87) | 4.68E-02 | 0.78 (0.61,1)    | 1.53E-03 | 0.45 (0.28,0.74) |
| rs6811337  | 4  | 172314454 |              | T | 1970 | 5.24E-06 | 0.7 (0.6,0.83)   | 1.40E-04 | 0.68 (0.56,0.83) | 2.99E-02 | 0.74 (0.57,0.97) | 1.68E-01 | 0.69 (0.41,1.17) |
| rs6047279  | 20 | 21090353  | PLK1S1       | T | 1997 | 5.30E-06 | 0.69 (0.59,0.8)  | 9.37E-04 | 0.72 (0.59,0.88) | 4.68E-02 | 0.78 (0.61,1)    | 1.53E-03 | 0.45 (0.28,0.74) |
| rs4140624  | 6  | 19926539  |              | T | 1803 | 5.50E-06 | 0.65 (0.54,0.78) | 1.25E-03 | 0.67 (0.53,0.85) | 1.17E-03 | 0.63 (0.47,0.83) |          |                  |
| rs17246620 | 4  | 172199835 | LOC100506122 | G | 1981 | 5.59E-06 | 0.71 (0.6,0.83)  | 1.44E-04 | 0.68 (0.56,0.83) | 3.09E-02 | 0.75 (0.57,0.97) | 1.69E-01 | 0.69 (0.41,1.17) |
| rs3129943  | 6  | 32446673  | C6orf10      | G | 1813 | 5.71E-06 | 1.44 (1.23,1.69) | 4.19E-04 | 1.43 (1.17,1.75) | 4.32E-03 | 1.45 (1.12,1.88) |          |                  |
| rs11157764 | 14 | 50320087  | NIN          | A | 1773 | 6.32E-06 | 1.67 (1.34,2.1)  | 2.04E-04 | 1.74 (1.3,2.33)  | 9.96E-03 | 1.59 (1.12,2.27) |          |                  |
| rs1396323  | 4  | 172142182 |              | A | 1970 | 6.45E-06 | 0.71 (0.61,0.84) | 9.56E-05 | 0.68 (0.55,0.82) | 4.32E-02 | 0.76 (0.59,0.99) | 2.06E-01 | 0.71 (0.42,1.2)  |
| rs7681844  | 4  | 172142671 |              | C | 1970 | 6.53E-06 | 0.71 (0.61,0.84) | 9.63E-05 | 0.68 (0.55,0.82) | 4.34E-02 | 0.76 (0.59,0.99) | 2.06E-01 | 0.71 (0.42,1.2)  |
| rs13148831 | 4  | 172146081 |              | T | 1970 | 6.63E-06 | 0.71 (0.61,0.84) | 9.78E-05 | 0.68 (0.56,0.82) | 4.34E-02 | 0.76 (0.59,0.99) | 2.06E-01 | 0.71 (0.42,1.2)  |
| rs2332086  | 4  | 172147756 |              | G | 1970 | 6.65E-06 | 0.71 (0.61,0.84) | 9.82E-05 | 0.68 (0.56,0.82) | 4.34E-02 | 0.76 (0.59,0.99) | 2.06E-01 | 0.71 (0.42,1.2)  |
| rs6047293  | 20 | 21102487  | PLK1S1       | G | 1997 | 6.67E-06 | 0.69 (0.59,0.8)  | 1.19E-03 | 0.73 (0.6,0.88)  | 4.63E-02 | 0.78 (0.61,1)    | 1.53E-03 | 0.45 (0.28,0.74) |
| rs6082339  | 20 | 21100742  | PLK1S1       | G | 1997 | 6.67E-06 | 0.69 (0.59,0.8)  | 1.19E-03 | 0.73 (0.6,0.88)  | 4.63E-02 | 0.78 (0.61,1)    | 1.53E-03 | 0.45 (0.28,0.74) |
| rs910975   | 20 | 21104169  | PLK1S1       | A | 1997 | 6.67E-06 | 0.69 (0.59,0.8)  | 1.19E-03 | 0.73 (0.6,0.88)  | 4.63E-02 | 0.78 (0.61,1)    | 1.53E-03 | 0.45 (0.28,0.74) |
| rs2093070  | 20 | 21105510  | PLK1S1       | T | 1997 | 6.67E-06 | 0.69 (0.59,0.8)  | 1.19E-03 | 0.73 (0.6,0.88)  | 4.63E-02 | 0.78 (0.61,1)    | 1.53E-03 | 0.45 (0.28,0.74) |
| rs6515144  | 20 | 21105565  | PLK1S1       | T | 1997 | 6.67E-06 | 0.69 (0.59,0.8)  | 1.19E-03 | 0.73 (0.6,0.88)  | 4.63E-02 | 0.78 (0.61,1)    | 1.53E-03 | 0.45 (0.28,0.74) |
| rs6035795  | 20 | 21093885  | PLK1S1       | A | 1997 | 6.69E-06 | 0.69 (0.59,0.8)  | 1.18E-03 | 0.73 (0.6,0.88)  | 4.68E-02 | 0.78 (0.61,1)    | 1.53E-03 | 0.45 (0.28,0.74) |
| rs6047281  | 20 | 21094287  | PLK1S1       | A | 1998 | 6.72E-06 | 0.69 (0.59,0.8)  | 1.18E-03 | 0.73 (0.6,0.88)  | 4.68E-02 | 0.78 (0.61,1)    | 1.53E-03 | 0.45 (0.28,0.74) |
| rs7682721  | 4  | 172151045 |              | T | 1970 | 6.73E-06 | 0.71 (0.61,0.84) | 9.97E-05 | 0.68 (0.56,0.82) | 4.34E-02 | 0.76 (0.59,0.99) | 2.06E-01 | 0.71 (0.42,1.2)  |
| rs6827582  | 4  | 172179792 |              | A | 1982 | 6.87E-06 | 0.71 (0.6,0.83)  | 1.81E-04 | 0.68 (0.56,0.83) | 3.10E-02 | 0.75 (0.57,0.97) | 1.69E-01 | 0.69 (0.41,1.17) |

|            |    |           |              |   |      |          |                  |          |                  |          |                  |          |                  |
|------------|----|-----------|--------------|---|------|----------|------------------|----------|------------------|----------|------------------|----------|------------------|
| rs6811103  | 4  | 172176175 |              | T | 1984 | 6.90E-06 | 0.71 (0.6,0.83)  | 2.09E-04 | 0.69 (0.56,0.84) | 2.99E-02 | 0.74 (0.57,0.97) | 1.49E-01 | 0.68 (0.4,1.15)  |
| rs11735676 | 4  | 172177663 |              | T | 1983 | 7.11E-06 | 0.71 (0.6,0.83)  | 1.97E-04 | 0.69 (0.56,0.84) | 2.99E-02 | 0.74 (0.57,0.97) | 1.68E-01 | 0.69 (0.41,1.17) |
| rs10012648 | 4  | 172177040 |              | C | 1983 | 7.12E-06 | 0.71 (0.6,0.83)  | 1.98E-04 | 0.69 (0.56,0.84) | 2.99E-02 | 0.74 (0.57,0.97) | 1.68E-01 | 0.69 (0.41,1.17) |
| rs13151801 | 4  | 172176859 |              | T | 1983 | 7.12E-06 | 0.71 (0.6,0.83)  | 1.98E-04 | 0.69 (0.56,0.84) | 2.99E-02 | 0.74 (0.57,0.97) | 1.68E-01 | 0.69 (0.41,1.17) |
| rs7673070  | 4  | 172176632 |              | C | 1983 | 7.14E-06 | 0.71 (0.6,0.83)  | 1.97E-04 | 0.69 (0.56,0.84) | 3.01E-02 | 0.74 (0.57,0.97) | 1.68E-01 | 0.69 (0.41,1.17) |
| rs6812562  | 4  | 172177061 |              | A | 1983 | 7.14E-06 | 0.71 (0.6,0.83)  | 1.97E-04 | 0.69 (0.56,0.84) | 3.01E-02 | 0.74 (0.57,0.97) | 1.68E-01 | 0.69 (0.41,1.17) |
| rs13138342 | 4  | 172177180 |              | C | 1983 | 7.14E-06 | 0.71 (0.6,0.83)  | 1.97E-04 | 0.69 (0.56,0.84) | 3.01E-02 | 0.74 (0.57,0.97) | 1.68E-01 | 0.69 (0.41,1.17) |
| rs6553556  | 4  | 172176526 |              | A | 1983 | 7.14E-06 | 0.71 (0.6,0.83)  | 1.97E-04 | 0.69 (0.56,0.84) | 3.01E-02 | 0.74 (0.57,0.97) | 1.68E-01 | 0.69 (0.41,1.17) |
| rs12648447 | 4  | 172175669 |              | T | 1985 | 7.45E-06 | 0.71 (0.6,0.83)  | 2.09E-04 | 0.69 (0.56,0.84) | 2.99E-02 | 0.74 (0.57,0.97) | 1.67E-01 | 0.7 (0.42,1.16)  |
| rs25511    | 4  | 172175559 |              | T | 1985 | 7.49E-06 | 0.71 (0.6,0.83)  | 2.09E-04 | 0.69 (0.56,0.84) | 2.99E-02 | 0.74 (0.57,0.97) | 1.68E-01 | 0.69 (0.41,1.17) |
| rs9968437  | 4  | 172173406 |              | T | 1985 | 7.49E-06 | 0.71 (0.6,0.83)  | 2.09E-04 | 0.69 (0.56,0.84) | 2.99E-02 | 0.74 (0.57,0.97) | 1.68E-01 | 0.69 (0.41,1.17) |
| rs1605651  | 4  | 172162912 |              | A | 1985 | 7.50E-06 | 0.71 (0.6,0.83)  | 2.08E-04 | 0.69 (0.56,0.84) | 3.01E-02 | 0.74 (0.57,0.97) | 1.68E-01 | 0.69 (0.41,1.17) |
| rs11132865 | 4  | 172164946 |              | C | 1985 | 7.50E-06 | 0.71 (0.6,0.83)  | 2.09E-04 | 0.69 (0.56,0.84) | 2.99E-02 | 0.74 (0.57,0.97) | 1.68E-01 | 0.69 (0.41,1.17) |
| rs13115632 | 4  | 172164388 |              | G | 1985 | 7.50E-06 | 0.71 (0.6,0.83)  | 2.09E-04 | 0.69 (0.56,0.84) | 2.99E-02 | 0.74 (0.57,0.97) | 1.68E-01 | 0.69 (0.41,1.17) |
| rs1396325  | 4  | 172167776 |              | G | 1985 | 7.50E-06 | 0.71 (0.6,0.83)  | 2.09E-04 | 0.69 (0.56,0.84) | 2.99E-02 | 0.74 (0.57,0.97) | 1.68E-01 | 0.69 (0.41,1.17) |
| rs4692627  | 4  | 172165637 |              | T | 1985 | 7.50E-06 | 0.71 (0.6,0.83)  | 2.09E-04 | 0.69 (0.56,0.84) | 2.99E-02 | 0.74 (0.57,0.97) | 1.68E-01 | 0.69 (0.41,1.17) |
| rs1508507  | 4  | 172172780 |              | A | 1985 | 7.54E-06 | 0.71 (0.6,0.83)  | 2.09E-04 | 0.69 (0.56,0.84) | 3.01E-02 | 0.74 (0.57,0.97) | 1.68E-01 | 0.69 (0.41,1.17) |
| rs25510    | 4  | 172175579 |              | A | 1985 | 7.54E-06 | 0.71 (0.6,0.83)  | 2.09E-04 | 0.69 (0.56,0.84) | 3.01E-02 | 0.74 (0.57,0.97) | 1.68E-01 | 0.69 (0.41,1.17) |
| rs25512    | 4  | 172175532 |              | G | 1985 | 7.54E-06 | 0.71 (0.6,0.83)  | 2.09E-04 | 0.69 (0.56,0.84) | 3.01E-02 | 0.74 (0.57,0.97) | 1.68E-01 | 0.69 (0.41,1.17) |
| rs6849128  | 4  | 172176001 |              | A | 1985 | 7.54E-06 | 0.71 (0.6,0.83)  | 2.09E-04 | 0.69 (0.56,0.84) | 3.01E-02 | 0.74 (0.57,0.97) | 1.68E-01 | 0.69 (0.41,1.17) |
| rs6858075  | 4  | 172172043 |              | A | 1985 | 7.54E-06 | 0.71 (0.6,0.83)  | 2.09E-04 | 0.69 (0.56,0.84) | 3.01E-02 | 0.74 (0.57,0.97) | 1.68E-01 | 0.69 (0.41,1.17) |
| rs8120293  | 20 | 21116395  | PLK1S1       | T | 1991 | 7.63E-06 | 0.69 (0.59,0.8)  | 1.36E-03 | 0.73 (0.6,0.88)  | 4.63E-02 | 0.78 (0.61,1)    | 1.53E-03 | 0.45 (0.28,0.74) |
| rs8120377  | 20 | 21116361  | PLK1S1       | T | 1991 | 7.63E-06 | 0.69 (0.59,0.8)  | 1.36E-03 | 0.73 (0.6,0.88)  | 4.63E-02 | 0.78 (0.61,1)    | 1.53E-03 | 0.45 (0.28,0.74) |
| rs765585   | 20 | 21119172  | PLK1S1       | T | 1991 | 7.63E-06 | 0.69 (0.59,0.8)  | 1.36E-03 | 0.73 (0.6,0.88)  | 4.63E-02 | 0.78 (0.61,1)    | 1.53E-03 | 0.45 (0.28,0.74) |
| rs17187123 | 4  | 172344509 | LOC100506122 | A | 1935 | 8.00E-06 | 0.71 (0.61,0.84) | 1.68E-04 | 0.68 (0.56,0.83) | 3.35E-02 | 0.75 (0.57,0.98) | 2.08E-01 | 0.72 (0.43,1.2)  |
| rs17246878 | 4  | 172208800 | LOC100506122 | T | 1935 | 8.19E-06 | 0.71 (0.61,0.84) | 1.72E-04 | 0.68 (0.56,0.83) | 3.35E-02 | 0.75 (0.57,0.98) | 2.08E-01 | 0.72 (0.43,1.2)  |
| rs879064   | 20 | 21123550  | PLK1S1       | C | 1991 | 8.55E-06 | 0.69 (0.59,0.8)  | 1.36E-03 | 0.73 (0.6,0.88)  | 4.63E-02 | 0.78 (0.61,1)    | 2.05E-03 | 0.46 (0.28,0.75) |
| rs1508296  | 4  | 172208949 | LOC100506122 | C | 1976 | 8.76E-06 | 0.71 (0.61,0.83) | 1.91E-04 | 0.69 (0.56,0.84) | 3.71E-02 | 0.75 (0.58,0.98) | 1.67E-01 | 0.69 (0.41,1.17) |
| rs13110268 | 4  | 172211262 | LOC100506122 | G | 1976 | 8.82E-06 | 0.71 (0.61,0.83) | 1.93E-04 | 0.69 (0.56,0.84) | 3.69E-02 | 0.75 (0.58,0.98) | 1.68E-01 | 0.69 (0.41,1.17) |
| rs7340816  | 4  | 172179585 |              | A | 1944 | 8.87E-06 | 0.71 (0.6,0.83)  | 2.27E-04 | 0.69 (0.56,0.84) | 3.30E-02 | 0.75 (0.57,0.98) | 1.62E-01 | 0.69 (0.41,1.16) |

Supplemental Table S2. Top HLA region associations (genomic control adjusted P-values, not adjusted for HLA-risk haplotype tagging SNPs) for  $P < 10^{-4}$ .

| Marker    | Position | Gene Name | RA | Mode | Meta best P-value | Meta OR         | Set I P-value adj | Set I OR        | Set II P-value adj | Set II OR (95%CI) | Set III P-value adj | Set III OR(95%CI) |
|-----------|----------|-----------|----|------|-------------------|-----------------|-------------------|-----------------|--------------------|-------------------|---------------------|-------------------|
| rs2647012 | 32772436 |           | C  | A    | 2.64E-07          | 0.66(0.57,0.77) | 1.23E-03          | 0.73(0.6,0.88)  | 7.22E-04           | 0.66(0.52,0.84)   | 5.84E-03            | 0.52(0.32,0.82)   |
| rs2647003 | 32772859 |           | G  | A    | 3.62E-07          | 0.67(0.58,0.77) | 1.24E-03          | 0.73(0.6,0.88)  | 1.03E-03           | 0.67(0.53,0.85)   | 5.83E-03            | 0.52(0.32,0.82)   |
| rs2647040 | 32775259 |           | G  | A    | 6.09E-07          | 0.67(0.58,0.78) | 1.62E-03          | 0.73(0.6,0.89)  | 1.38E-03           | 0.68(0.54,0.86)   | 5.24E-03            | 0.51(0.32,0.82)   |
| rs2858310 | 32776302 |           | A  | A    | 7.67E-07          | 0.67(0.58,0.78) | 1.95E-03          | 0.74(0.61,0.89) | 1.42E-03           | 0.68(0.54,0.86)   | 5.24E-03            | 0.52(0.32,0.82)   |
| rs2647046 | 32776315 |           | C  | A    | 8.04E-07          | 0.67(0.58,0.78) | 1.95E-03          | 0.74(0.61,0.89) | 1.44E-03           | 0.68(0.54,0.86)   | 5.57E-03            | 0.52(0.32,0.82)   |
| rs9275521 | 32782931 |           | C  | A    | 1.28E-06          | 0.68(0.59,0.78) | 2.19E-03          | 0.74(0.61,0.89) | 1.96E-03           | 0.69(0.54,0.87)   | 5.95E-03            | 0.52(0.32,0.83)   |
| rs9267972 | 32325210 |           | A  | D    | 1.49E-06          | 1.85(1.46,2.33) | 4.25E-03          | 1.52(1.15,2.02) | 7.31E-04           | 1.96(1.33,2.89)   | 1.03E-02            | 2.78(1.28,6.04)   |
| rs9275517 | 32782628 |           | G  | A    | 1.92E-06          | 0.68(0.59,0.79) | 2.05E-03          | 0.74(0.61,0.89) | 3.41E-03           | 0.7(0.56,0.89)    | 5.93E-03            | 0.52(0.32,0.83)   |
| rs9275596 | 32789610 |           | C  | A    | 2.01E-06          | 1.48(1.28,1.72) | 2.75E-03          | 1.35(1.11,1.64) | 3.05E-03           | 1.45(1.14,1.85)   | 3.66E-03            | 2.02(1.26,3.25)   |
| rs9275524 | 32783087 |           | C  | A    | 2.09E-06          | 0.68(0.59,0.79) | 2.20E-03          | 0.74(0.61,0.9)  | 3.40E-03           | 0.7(0.56,0.89)    | 6.08E-03            | 0.52(0.32,0.83)   |
| rs3998157 | 32786456 |           | A  | A    | 2.09E-06          | 0.68(0.59,0.79) | 2.20E-03          | 0.74(0.61,0.9)  | 3.40E-03           | 0.7(0.56,0.89)    | 6.10E-03            | 0.52(0.32,0.83)   |
| rs9394114 | 32785917 |           | C  | A    | 2.09E-06          | 0.68(0.59,0.79) | 2.20E-03          | 0.74(0.61,0.9)  | 3.40E-03           | 0.7(0.56,0.89)    | 6.10E-03            | 0.52(0.32,0.83)   |
| rs9380318 | 32785648 |           | T  | A    | 2.11E-06          | 0.68(0.59,0.79) | 2.20E-03          | 0.74(0.61,0.9)  | 3.41E-03           | 0.7(0.56,0.89)    | 6.10E-03            | 0.52(0.32,0.83)   |
| rs9275572 | 32786977 |           | G  | A    | 2.45E-06          | 0.69(0.59,0.79) | 2.42E-03          | 0.74(0.62,0.9)  | 3.41E-03           | 0.7(0.56,0.89)    | 6.83E-03            | 0.52(0.33,0.83)   |
| rs6936204 | 32325070 |           | T  | A    | 2.92E-06          | 1.46(1.26,1.69) | 1.95E-03          | 1.36(1.12,1.65) | 7.55E-03           | 1.38(1.09,1.75)   | 3.56E-03            | 1.99(1.26,3.16)   |
| rs3129943 | 32446673 | C6orf10   | G  | D    | 3.60E-06          | 1.58(1.29,1.95) | 7.80E-04          | 1.58(1.21,2.06) | 7.26E-04           | 1.79(1.28,2.51)   | 6.17E-01            | 1.2(0.61,2.34)    |
| rs3130316 | 32329206 |           | T  | A    | 3.93E-06          | 1.45(1.25,1.68) | 3.14E-03          | 1.34(1.11,1.62) | 4.99E-03           | 1.4(1.11,1.78)    | 4.55E-03            | 1.96(1.23,3.12)   |
| rs3115571 | 32328896 |           | A  | A    | 3.93E-06          | 1.45(1.25,1.68) | 3.13E-03          | 1.34(1.11,1.62) | 4.99E-03           | 1.4(1.11,1.78)    | 4.55E-03            | 1.96(1.23,3.12)   |
| rs3096700 | 32329760 |           | A  | A    | 4.01E-06          | 1.45(1.25,1.68) | 3.20E-03          | 1.34(1.11,1.62) | 4.99E-03           | 1.4(1.11,1.78)    | 4.57E-03            | 1.96(1.23,3.12)   |
| rs521828  | 32399621 | C6orf10   | T  | D    | 4.45E-06          | 1.59(1.29,1.95) | 1.93E-03          | 1.52(1.17,1.98) | 3.26E-04           | 1.87(1.33,2.63)   | 5.21E-01            | 1.25(0.65,2.43)   |
| rs3130309 | 32323450 |           | A  | A    | 4.83E-06          | 1.45(1.25,1.67) | 3.78E-03          | 1.33(1.1,1.61)  | 4.99E-03           | 1.4(1.11,1.78)    | 4.55E-03            | 1.96(1.23,3.12)   |
| rs2647044 | 32775888 |           | A  | D    | 7.75E-06          | 1.61(1.29,2)    | 9.29E-04          | 1.62(1.22,2.15) | 2.08E-03           | 1.75(1.23,2.5)    | 4.61E-01            | 1.31(0.65,2.64)   |
| rs9275576 | 32787305 |           | T  | D    | 8.33E-06          | 1.62(1.3,2.02)  | 9.86E-04          | 1.63(1.22,2.17) | 2.09E-03           | 1.76(1.23,2.52)   | 4.67E-01            | 1.31(0.65,2.66)   |
| rs2856674 | 32767623 |           | G  | D    | 8.79E-06          | 1.6(1.29,1.99)  | 9.79E-04          | 1.61(1.22,2.14) | 2.02E-03           | 1.75(1.23,2.49)   | 5.12E-01            | 1.27(0.63,2.57)   |
| rs9268177 | 32382861 | C6orf10   | A  | D    | 9.08E-06          | 1.64(1.31,2.04) | 3.74E-04          | 1.7(1.27,2.26)  | 1.89E-02           | 1.53(1.08,2.18)   | 1.36E-01            | 1.71(0.85,3.46)   |
| rs3130320 | 32331236 |           | T  | D    | 9.30E-06          | 1.71(1.36,2.15) | 5.90E-03          | 1.49(1.13,1.96) | 1.32E-03           | 1.89(1.28,2.77)   | 6.29E-02            | 2.06(0.97,4.37)   |
| rs9268208 | 32388570 | C6orf10   | C  | D    | 9.40E-06          | 1.64(1.31,2.04) | 3.75E-04          | 1.7(1.27,2.26)  | 1.92E-02           | 1.53(1.08,2.18)   | 1.38E-01            | 1.71(0.85,3.44)   |
| rs9268219 | 32392087 | C6orf10   | G  | D    | 9.83E-06          | 1.63(1.31,2.03) | 3.77E-04          | 1.69(1.27,2.26) | 1.95E-02           | 1.53(1.08,2.18)   | 1.43E-01            | 1.7(0.84,3.41)    |
| rs9268235 | 32398186 | C6orf10   | T  | D    | 1.03E-05          | 1.63(1.31,2.03) | 3.91E-04          | 1.69(1.27,2.26) | 1.96E-02           | 1.53(1.08,2.17)   | 1.43E-01            | 1.69(0.84,3.4)    |

|           |          |         |   |   |          |                 |          |                 |          |                 |          |                 |
|-----------|----------|---------|---|---|----------|-----------------|----------|-----------------|----------|-----------------|----------|-----------------|
| rs9268144 | 32365178 |         | C | D | 1.11E-05 | 1.63(1.31,2.03) | 4.54E-04 | 1.68(1.26,2.24) | 1.91E-02 | 1.53(1.08,2.18) | 1.36E-01 | 1.71(0.85,3.46) |
| rs9296032 | 32526688 |         | C | D | 1.13E-05 | 1.78(1.42,2.23) | 1.59E-02 | 1.42(1.07,1.87) | 4.63E-03 | 1.75(1.19,2.56) | 5.79E-04 | 3.52(1.72,7.2)  |
| rs7775397 | 32369231 | C6orf10 | G | D | 1.16E-05 | 1.63(1.31,2.03) | 4.77E-04 | 1.67(1.26,2.23) | 1.91E-02 | 1.53(1.08,2.18) | 1.36E-01 | 1.71(0.85,3.46) |
| rs2395149 | 32433540 | C6orf10 | A | D | 1.22E-05 | 1.62(1.3,2.02)  | 4.43E-04 | 1.68(1.26,2.24) | 2.06E-02 | 1.52(1.07,2.16) | 1.46E-01 | 1.69(0.84,3.38) |
| rs3129927 | 32441805 | C6orf10 | C | D | 1.24E-05 | 1.62(1.3,2.02)  | 4.62E-04 | 1.68(1.26,2.23) | 2.01E-02 | 1.53(1.07,2.17) | 1.47E-01 | 1.68(0.84,3.38) |
| rs3129949 | 32406792 | C6orf10 | A | D | 1.36E-05 | 1.55(1.26,1.91) | 5.06E-03 | 1.47(1.13,1.91) | 3.23E-04 | 1.86(1.33,2.6)  | 5.55E-01 | 1.23(0.64,2.37) |
| rs2040410 | 32710677 |         | T | D | 1.67E-05 | 1.57(1.26,1.94) | 1.57E-03 | 1.57(1.19,2.08) | 2.70E-03 | 1.7(1.21,2.4)   | 4.81E-01 | 1.29(0.65,2.57) |
| rs1003878 | 32407800 | C6orf10 | A | D | 1.72E-05 | 1.54(1.26,1.9)  | 5.02E-03 | 1.47(1.13,1.91) | 4.58E-04 | 1.83(1.31,2.56) | 5.55E-01 | 1.23(0.64,2.37) |
| rs9368716 | 32414069 | C6orf10 | A | A | 2.21E-05 | 0.72(0.62,0.83) | 1.06E-03 | 0.73(0.6,0.88)  | 2.89E-02 | 0.76(0.59,0.97) | 5.36E-02 | 0.62(0.39,1)    |
| rs1150754 | 32158736 | TNXB    | T | D | 2.30E-05 | 1.58(1.27,1.96) | 3.91E-04 | 1.66(1.26,2.19) | 3.73E-02 | 1.46(1.03,2.07) | 1.76E-01 | 1.61(0.81,3.2)  |
| rs1150755 | 32146528 | TNXB    | T | D | 2.31E-05 | 1.58(1.27,1.96) | 4.01E-04 | 1.66(1.26,2.19) | 3.66E-02 | 1.46(1.03,2.07) | 1.77E-01 | 1.61(0.81,3.2)  |
| rs9268209 | 32388599 | C6orf10 | C | D | 2.52E-05 | 1.58(1.28,1.95) | 2.06E-03 | 1.53(1.17,2)    | 9.48E-03 | 1.58(1.12,2.23) | 1.32E-01 | 1.71(0.86,3.38) |
| rs9276665 | 32855480 |         | G | D | 2.55E-05 | 1.61(1.29,2.02) | 6.88E-04 | 1.68(1.25,2.26) | 2.26E-02 | 1.53(1.07,2.19) | 2.03E-01 | 1.61(0.78,3.3)  |
| rs1794282 | 32774504 |         | T | D | 2.77E-05 | 1.6(1.28,2.01)  | 7.16E-04 | 1.68(1.25,2.25) | 2.19E-02 | 1.53(1.07,2.19) | 2.25E-01 | 1.57(0.77,3.2)  |
| rs9276731 | 32873564 |         | T | D | 3.04E-05 | 1.6(1.28,2.01)  | 9.20E-04 | 1.66(1.23,2.22) | 2.06E-02 | 1.54(1.07,2.2)  | 1.99E-01 | 1.61(0.78,3.32) |
| rs2894254 | 32453668 |         | G | D | 3.25E-05 | 1.58(1.27,1.97) | 1.67E-03 | 1.59(1.2,2.12)  | 1.09E-02 | 1.59(1.12,2.25) | 2.28E-01 | 1.55(0.77,3.14) |
| rs9268207 | 32388440 | C6orf10 | T | D | 3.25E-05 | 1.54(1.26,1.9)  | 1.77E-03 | 1.54(1.18,2)    | 1.11E-02 | 1.55(1.11,2.17) | 2.03E-01 | 1.55(0.8,3.01)  |
| rs7341328 | 32383172 | C6orf10 | A | D | 3.32E-05 | 1.54(1.25,1.9)  | 1.77E-03 | 1.54(1.18,2)    | 1.11E-02 | 1.55(1.11,2.17) | 2.10E-01 | 1.53(0.79,2.97) |
| rs9268181 | 32383987 | C6orf10 | C | D | 3.32E-05 | 1.54(1.25,1.9)  | 1.77E-03 | 1.54(1.18,2)    | 1.11E-02 | 1.55(1.11,2.17) | 2.10E-01 | 1.53(0.79,2.97) |
| rs9268182 | 32384005 | C6orf10 | G | D | 3.32E-05 | 1.54(1.25,1.9)  | 1.77E-03 | 1.54(1.18,2)    | 1.11E-02 | 1.55(1.11,2.17) | 2.10E-01 | 1.53(0.79,2.97) |
| rs9268197 | 32385912 | C6orf10 | A | D | 3.32E-05 | 1.54(1.25,1.9)  | 1.77E-03 | 1.54(1.18,2)    | 1.11E-02 | 1.55(1.11,2.17) | 2.10E-01 | 1.53(0.79,2.97) |
| rs9268201 | 32387262 | C6orf10 | A | D | 3.32E-05 | 1.54(1.25,1.9)  | 1.77E-03 | 1.54(1.18,2)    | 1.11E-02 | 1.55(1.11,2.17) | 2.10E-01 | 1.53(0.79,2.97) |
| rs3864302 | 32386770 | C6orf10 | T | D | 3.32E-05 | 1.54(1.25,1.9)  | 1.77E-03 | 1.54(1.18,2)    | 1.11E-02 | 1.55(1.11,2.17) | 2.10E-01 | 1.53(0.79,2.97) |
| rs6934429 | 32387600 | C6orf10 | T | D | 3.32E-05 | 1.54(1.25,1.9)  | 1.77E-03 | 1.54(1.18,2)    | 1.11E-02 | 1.55(1.11,2.17) | 2.10E-01 | 1.53(0.79,2.97) |
| rs7341300 | 32383005 | C6orf10 | T | D | 3.32E-05 | 1.54(1.25,1.9)  | 1.77E-03 | 1.54(1.18,2)    | 1.11E-02 | 1.55(1.11,2.17) | 2.10E-01 | 1.53(0.79,2.97) |
| rs9268200 | 32386648 | C6orf10 | T | D | 3.32E-05 | 1.54(1.25,1.9)  | 1.77E-03 | 1.54(1.18,2)    | 1.11E-02 | 1.55(1.11,2.17) | 2.10E-01 | 1.53(0.79,2.97) |
| rs9268202 | 32387318 | C6orf10 | T | D | 3.32E-05 | 1.54(1.25,1.9)  | 1.77E-03 | 1.54(1.18,2)    | 1.11E-02 | 1.55(1.11,2.17) | 2.10E-01 | 1.53(0.79,2.97) |
| rs9268204 | 32387478 | C6orf10 | T | D | 3.32E-05 | 1.54(1.25,1.9)  | 1.77E-03 | 1.54(1.18,2)    | 1.11E-02 | 1.55(1.11,2.17) | 2.10E-01 | 1.53(0.79,2.97) |
| rs3864300 | 32379785 | C6orf10 | T | D | 3.40E-05 | 1.54(1.25,1.89) | 1.77E-03 | 1.54(1.18,2)    | 1.14E-02 | 1.55(1.11,2.17) | 2.10E-01 | 1.53(0.79,2.97) |
| rs3864301 | 32379933 | C6orf10 | T | D | 3.40E-05 | 1.54(1.25,1.89) | 1.77E-03 | 1.54(1.18,2)    | 1.14E-02 | 1.55(1.11,2.17) | 2.10E-01 | 1.53(0.79,2.97) |
| rs9268170 | 32380689 | C6orf10 | G | D | 3.40E-05 | 1.54(1.25,1.89) | 1.77E-03 | 1.54(1.18,2)    | 1.14E-02 | 1.55(1.11,2.17) | 2.10E-01 | 1.53(0.79,2.97) |
| rs6935269 | 32368328 |         | C | D | 3.43E-05 | 1.54(1.25,1.89) | 1.79E-03 | 1.54(1.18,2.01) | 1.14E-02 | 1.55(1.11,2.17) | 2.10E-01 | 1.53(0.79,2.97) |
| rs9268402 | 32449332 | C6orf10 | A | A | 3.47E-05 | 0.7(0.6,0.81)   | 3.26E-02 | 0.81(0.66,0.98) | 2.08E-03 | 0.68(0.53,0.87) | 6.10E-03 | 0.51(0.32,0.83) |
| rs9268163 | 32378853 | C6orf10 | T | D | 3.57E-05 | 1.54(1.25,1.89) | 1.87E-03 | 1.53(1.18,2)    | 1.14E-02 | 1.55(1.11,2.17) | 2.10E-01 | 1.53(0.79,2.97) |
| rs2858330 | 32766694 |         | C | A | 3.59E-05 | 0.71(0.61,0.82) | 2.56E-03 | 0.74(0.61,0.9)  | 8.34E-02 | 0.8(0.63,1.02)  | 1.25E-03 | 0.46(0.29,0.74) |
| rs7762279 | 32863269 |         | C | D | 3.72E-05 | 1.6(1.28,2)     | 1.02E-03 | 1.65(1.23,2.23) | 2.23E-02 | 1.53(1.07,2.18) | 2.05E-01 | 1.6(0.78,3.3)   |



|           |          |         |   |   |          |                 |          |                 |          |                 |          |                 |
|-----------|----------|---------|---|---|----------|-----------------|----------|-----------------|----------|-----------------|----------|-----------------|
| rs7775592 | 32378261 | C6orf10 | A | D | 3.76E-05 | 1.54(1.25,1.89) | 1.96E-03 | 1.53(1.17,2)    | 1.14E-02 | 1.55(1.11,2.17) | 2.10E-01 | 1.53(0.79,2.97) |
| rs6909427 | 32376679 | C6orf10 | G | D | 3.77E-05 | 1.54(1.25,1.89) | 1.97E-03 | 1.53(1.17,2)    | 1.14E-02 | 1.55(1.11,2.17) | 2.10E-01 | 1.53(0.79,2.97) |
| rs7750783 | 32376058 | C6orf10 | T | D | 3.77E-05 | 1.54(1.25,1.89) | 1.97E-03 | 1.53(1.17,2)    | 1.14E-02 | 1.55(1.11,2.17) | 2.10E-01 | 1.53(0.79,2.97) |
| rs9267084 | 31517585 |         | A | D | 3.89E-05 | 0.55(0.42,0.7)  | 7.76E-03 | 0.64(0.47,0.89) | 3.10E-02 | 0.62(0.4,0.95)  | 1.12E-03 | 0.26(0.11,0.58) |
| rs1018434 | 32389338 | C6orf10 | C | D | 3.96E-05 | 1.54(1.25,1.89) | 2.15E-03 | 1.53(1.17,1.99) | 1.07E-02 | 1.56(1.11,2.18) | 2.15E-01 | 1.53(0.79,2.97) |
| rs2069026 | 32389937 | C6orf10 | T | D | 4.05E-05 | 1.54(1.25,1.89) | 2.20E-03 | 1.53(1.17,1.99) | 1.06E-02 | 1.56(1.11,2.19) | 2.16E-01 | 1.53(0.79,2.97) |
| rs1018430 | 32389666 | C6orf10 | T | D | 4.08E-05 | 1.54(1.25,1.89) | 2.20E-03 | 1.53(1.17,1.99) | 1.06E-02 | 1.56(1.11,2.18) | 2.16E-01 | 1.53(0.79,2.97) |
| rs3864303 | 32389600 | C6orf10 | G | D | 4.08E-05 | 1.54(1.25,1.89) | 2.20E-03 | 1.53(1.17,1.99) | 1.07E-02 | 1.56(1.11,2.18) | 2.16E-01 | 1.53(0.79,2.97) |
| rs6903871 | 32389998 | C6orf10 | C | D | 4.08E-05 | 1.54(1.25,1.89) | 2.20E-03 | 1.53(1.17,1.99) | 1.06E-02 | 1.56(1.11,2.19) | 2.16E-01 | 1.53(0.79,2.97) |
| rs1018431 | 32389654 | C6orf10 | A | D | 4.08E-05 | 1.54(1.25,1.89) | 2.19E-03 | 1.53(1.17,1.99) | 1.07E-02 | 1.56(1.11,2.18) | 2.16E-01 | 1.53(0.79,2.97) |
| rs6909790 | 32390958 | C6orf10 | G | D | 4.22E-05 | 1.54(1.25,1.89) | 2.27E-03 | 1.52(1.17,1.99) | 1.07E-02 | 1.56(1.11,2.19) | 2.18E-01 | 1.53(0.79,2.97) |
| rs3749966 | 32369486 | C6orf10 | C | D | 4.30E-05 | 1.53(1.25,1.89) | 2.24E-03 | 1.52(1.17,1.99) | 1.14E-02 | 1.55(1.11,2.17) | 2.10E-01 | 1.53(0.79,2.97) |
| rs3130322 | 32331903 |         | C | D | 4.39E-05 | 1.54(1.25,1.89) | 2.70E-03 | 1.51(1.16,1.97) | 9.04E-03 | 1.58(1.12,2.21) | 2.20E-01 | 1.52(0.78,2.95) |
| rs3115569 | 32332117 |         | A | D | 4.40E-05 | 1.54(1.25,1.89) | 2.70E-03 | 1.51(1.16,1.97) | 9.10E-03 | 1.58(1.12,2.21) | 2.20E-01 | 1.52(0.78,2.95) |
| rs6908927 | 32332468 |         | A | D | 4.40E-05 | 1.54(1.25,1.89) | 2.70E-03 | 1.51(1.16,1.97) | 9.10E-03 | 1.58(1.12,2.21) | 2.20E-01 | 1.52(0.78,2.95) |
| rs6927098 | 32335484 |         | T | D | 4.42E-05 | 1.54(1.25,1.89) | 2.70E-03 | 1.51(1.16,1.97) | 9.13E-03 | 1.58(1.12,2.21) | 2.20E-01 | 1.52(0.78,2.96) |
| rs3115568 | 32332297 |         | T | D | 4.42E-05 | 1.54(1.25,1.89) | 2.70E-03 | 1.51(1.16,1.97) | 9.13E-03 | 1.58(1.12,2.21) | 2.20E-01 | 1.52(0.78,2.95) |
| rs9268218 | 32391678 | C6orf10 | G | D | 4.51E-05 | 1.54(1.25,1.89) | 2.42E-03 | 1.52(1.16,1.98) | 1.07E-02 | 1.56(1.11,2.19) | 2.18E-01 | 1.53(0.79,2.97) |
| rs3115553 | 32353805 |         | T | D | 4.91E-05 | 1.53(1.25,1.88) | 2.69E-03 | 1.51(1.16,1.97) | 1.08E-02 | 1.55(1.11,2.17) | 2.10E-01 | 1.53(0.79,2.97) |
| rs9268176 | 32382058 | C6orf10 | T | D | 4.95E-05 | 1.53(1.24,1.89) | 1.76E-03 | 1.56(1.18,2.04) | 1.32E-02 | 1.55(1.1,2.18)  | 2.98E-01 | 1.44(0.74,2.8)  |
| rs3130340 | 32352605 |         | C | D | 5.15E-05 | 1.53(1.24,1.88) | 2.69E-03 | 1.51(1.16,1.97) | 1.14E-02 | 1.55(1.11,2.17) | 2.10E-01 | 1.53(0.79,2.97) |
| rs9268143 | 32364452 |         | G | D | 5.19E-05 | 1.53(1.24,1.88) | 2.70E-03 | 1.51(1.16,1.97) | 1.14E-02 | 1.55(1.11,2.17) | 2.10E-01 | 1.53(0.79,2.97) |
| rs9268142 | 32364397 |         | C | D | 5.19E-05 | 1.53(1.24,1.88) | 2.70E-03 | 1.51(1.16,1.97) | 1.14E-02 | 1.55(1.11,2.17) | 2.10E-01 | 1.53(0.79,2.97) |
| rs1559874 | 32351133 |         | A | D | 5.22E-05 | 1.53(1.24,1.88) | 2.76E-03 | 1.51(1.16,1.97) | 1.14E-02 | 1.55(1.11,2.17) | 2.06E-01 | 1.54(0.8,2.97)  |
| rs3129856 | 32507316 |         | C | D | 5.27E-05 | 1.58(1.27,1.97) | 1.64E-03 | 1.6(1.2,2.13)   | 3.04E-02 | 1.48(1.04,2.11) | 1.09E-01 | 1.77(0.88,3.53) |
| rs1559873 | 32351107 |         | C | D | 5.29E-05 | 1.53(1.24,1.88) | 2.76E-03 | 1.51(1.16,1.97) | 1.14E-02 | 1.55(1.11,2.17) | 2.10E-01 | 1.53(0.79,2.97) |
| rs3117099 | 32466248 |         | A | D | 5.44E-05 | 1.53(1.24,1.89) | 4.56E-03 | 1.48(1.13,1.94) | 5.86E-03 | 1.62(1.15,2.27) | 2.42E-01 | 1.5(0.77,2.95)  |
| rs3132931 | 32343873 |         | G | D | 5.73E-05 | 1.52(1.24,1.87) | 2.75E-03 | 1.51(1.16,1.97) | 1.14E-02 | 1.55(1.11,2.17) | 2.36E-01 | 1.5(0.77,2.91)  |
| rs3115560 | 32344120 |         | A | D | 5.75E-05 | 1.52(1.24,1.87) | 2.75E-03 | 1.51(1.16,1.97) | 1.14E-02 | 1.55(1.11,2.17) | 2.36E-01 | 1.5(0.77,2.91)  |
| rs3096673 | 32345991 |         | C | D | 5.76E-05 | 1.52(1.24,1.87) | 2.76E-03 | 1.51(1.16,1.97) | 1.14E-02 | 1.55(1.11,2.17) | 2.36E-01 | 1.5(0.77,2.91)  |
| rs3132945 | 32346658 |         | G | D | 5.76E-05 | 1.52(1.24,1.87) | 2.76E-03 | 1.51(1.16,1.97) | 1.14E-02 | 1.55(1.11,2.17) | 2.36E-01 | 1.5(0.77,2.91)  |
| rs9469220 | 32766288 |         | A | R | 6.02E-05 | 0.55(0.41,0.73) | 1.96E-03 | 0.58(0.41,0.81) | 7.41E-03 | 0.51(0.32,0.83) |          |                 |
| rs6901158 | 32313921 |         | T | D | 6.12E-05 | 1.55(1.25,1.93) | 1.47E-04 | 1.71(1.3,2.24)  | 8.44E-02 | 1.37(0.97,1.94) |          |                 |
| rs9268473 | 32463662 |         | G | A | 6.24E-05 | 0.72(0.62,0.83) | 2.39E-02 | 0.8(0.66,0.97)  | 2.49E-03 | 0.68(0.54,0.87) | 3.75E-02 | 0.58(0.35,0.97) |
| rs2076533 | 32471506 | BTNL2   | T | A | 6.60E-05 | 0.72(0.62,0.83) | 2.48E-02 | 0.8(0.66,0.97)  | 2.53E-03 | 0.69(0.54,0.87) | 3.75E-02 | 0.58(0.35,0.97) |
| rs6457536 | 32381744 | C6orf10 | G | D | 6.68E-05 | 1.52(1.24,1.87) | 3.20E-03 | 1.5(1.15,1.96)  | 1.25E-02 | 1.55(1.1,2.17)  | 2.10E-01 | 1.53(0.79,2.97) |

|           |          |             |   |   |          |                 |          |                 |          |                 |          |                 |
|-----------|----------|-------------|---|---|----------|-----------------|----------|-----------------|----------|-----------------|----------|-----------------|
| rs3129858 | 32508498 |             | A | D | 6.70E-05 | 1.57(1.28,1.94) | 4.79E-03 | 1.47(1.13,1.91) | 3.01E-02 | 1.47(1.04,2.06) | 2.02E-02 | 2.22(1.14,4.32) |
| rs6457617 | 32771829 |             | T | A | 6.73E-05 | 0.72(0.62,0.84) | 2.26E-02 | 0.8(0.66,0.96)  | 2.75E-03 | 0.69(0.54,0.88) | 4.23E-02 | 0.61(0.38,0.98) |
| rs9275141 | 32759096 |             | G | A | 6.80E-05 | 0.71(0.61,0.83) | 2.81E-03 | 0.74(0.61,0.9)  | 1.02E-01 | 0.81(0.64,1.04) | 2.42E-03 | 0.47(0.28,0.76) |
| rs2395172 | 32507820 |             | C | D | 6.80E-05 | 1.57(1.28,1.94) | 4.85E-03 | 1.47(1.13,1.91) | 3.03E-02 | 1.47(1.04,2.06) | 2.01E-02 | 2.22(1.14,4.33) |
| rs3135394 | 32516475 | HLA-DRA     | G | D | 7.11E-05 | 1.57(1.26,1.96) | 2.16E-03 | 1.58(1.18,2.1)  | 3.12E-02 | 1.48(1.04,2.11) | 1.11E-01 | 1.76(0.88,3.52) |
| rs4988822 | 32506953 |             | T | D | 7.21E-05 | 1.57(1.28,1.94) | 5.15E-03 | 1.47(1.13,1.91) | 3.02E-02 | 1.47(1.04,2.06) | 2.00E-02 | 2.22(1.14,4.33) |
| rs3135340 | 32506850 |             | G | D | 7.21E-05 | 1.57(1.28,1.94) | 5.15E-03 | 1.47(1.13,1.91) | 3.02E-02 | 1.47(1.04,2.06) | 2.00E-02 | 2.22(1.14,4.33) |
| rs9275224 | 32767856 |             | G | A | 7.23E-05 | 0.73(0.63,0.84) | 2.11E-02 | 0.8(0.66,0.96)  | 3.40E-03 | 0.7(0.55,0.89)  | 4.24E-02 | 0.61(0.38,0.98) |
| rs3135342 | 32504593 |             | T | D | 7.24E-05 | 1.57(1.28,1.94) | 5.20E-03 | 1.47(1.13,1.91) | 3.02E-02 | 1.47(1.04,2.06) | 1.98E-02 | 2.22(1.14,4.33) |
| rs3129847 | 32504484 |             | G | D | 7.28E-05 | 1.57(1.28,1.94) | 5.21E-03 | 1.47(1.13,1.91) | 3.02E-02 | 1.47(1.04,2.06) | 1.98E-02 | 2.22(1.14,4.33) |
| rs9275295 | 32771370 |             | G | A | 7.29E-05 | 0.72(0.63,0.84) | 2.27E-02 | 0.8(0.66,0.96)  | 3.03E-03 | 0.69(0.55,0.88) | 4.23E-02 | 0.61(0.38,0.98) |
| rs9275292 | 32771268 |             | A | A | 7.29E-05 | 0.72(0.63,0.84) | 2.26E-02 | 0.8(0.66,0.96)  | 3.05E-03 | 0.69(0.55,0.88) | 4.23E-02 | 0.61(0.38,0.98) |
| rs4424066 | 32462407 |             | G | A | 7.34E-05 | 0.72(0.62,0.83) | 2.83E-02 | 0.8(0.66,0.97)  | 2.44E-03 | 0.68(0.53,0.87) | 3.75E-02 | 0.58(0.35,0.97) |
| rs983561  | 32511633 |             | G | D | 7.62E-05 | 1.56(1.27,1.92) | 4.76E-03 | 1.47(1.13,1.92) | 3.15E-02 | 1.46(1.04,2.05) | 2.46E-02 | 2.15(1.11,4.19) |
| rs9276689 | 32859941 |             | T | D | 7.89E-05 | 1.59(1.26,1.99) | 1.42E-03 | 1.64(1.21,2.21) | 4.64E-02 | 1.45(1.01,2.08) | 1.29E-01 | 1.77(0.85,3.68) |
| rs4947349 | 32855769 |             | T | D | 7.91E-05 | 1.59(1.26,1.99) | 1.43E-03 | 1.64(1.21,2.21) | 4.63E-02 | 1.45(1.01,2.08) | 1.29E-01 | 1.77(0.85,3.68) |
| rs5000563 | 32512113 |             | G | D | 7.94E-05 | 1.56(1.27,1.92) | 4.79E-03 | 1.47(1.13,1.91) | 3.19E-02 | 1.46(1.04,2.05) | 2.59E-02 | 2.14(1.1,4.16)  |
| rs4713583 | 32768132 |             | G | A | 7.97E-05 | 0.73(0.63,0.84) | 2.27E-02 | 0.8(0.66,0.96)  | 3.39E-03 | 0.7(0.55,0.88)  | 4.24E-02 | 0.61(0.38,0.98) |
| rs4713582 | 32768029 |             | C | A | 7.99E-05 | 0.73(0.63,0.84) | 2.27E-02 | 0.8(0.66,0.96)  | 3.40E-03 | 0.7(0.55,0.89)  | 4.24E-02 | 0.61(0.38,0.98) |
| rs3132928 | 32341993 |             | A | D | 7.99E-05 | 1.5(1.22,1.84)  | 2.74E-03 | 1.51(1.16,1.97) | 1.14E-02 | 1.55(1.11,2.17) | 3.71E-01 | 1.36(0.7,2.63)  |
| rs5002702 | 32767137 |             | A | A | 8.16E-05 | 0.73(0.63,0.84) | 2.29E-02 | 0.8(0.66,0.96)  | 3.44E-03 | 0.7(0.55,0.89)  | 4.24E-02 | 0.61(0.38,0.98) |
| rs6915455 | 32391473 | C6orf10     | A | D | 8.16E-05 | 1.52(1.23,1.88) | 2.82E-03 | 1.52(1.16,1.99) | 1.72E-02 | 1.53(1.08,2.16) | 2.22E-01 | 1.53(0.78,3)    |
| rs1150752 | 32172704 | TNXB        | C | D | 8.30E-05 | 1.54(1.23,1.92) | 1.13E-03 | 1.63(1.22,2.18) | 2.84E-02 | 1.5(1.05,2.14)  | 3.82E-01 | 1.38(0.68,2.79) |
| rs3793126 | 32479598 | BTNL2       | G | D | 8.33E-05 | 0.63(0.51,0.78) | 7.25E-03 | 0.69(0.53,0.9)  | 3.77E-02 | 0.69(0.49,0.97) | 6.93E-03 | 0.4(0.2,0.77)   |
| rs1150753 | 32167845 | TNXB        | G | D | 8.42E-05 | 1.54(1.23,1.92) | 1.14E-03 | 1.63(1.22,2.18) | 2.89E-02 | 1.5(1.05,2.13)  | 3.81E-01 | 1.38(0.68,2.78) |
| rs2395174 | 32512856 |             | G | D | 8.65E-05 | 1.56(1.27,1.91) | 4.90E-03 | 1.47(1.13,1.91) | 3.32E-02 | 1.46(1.04,2.05) | 2.75E-02 | 2.12(1.09,4.11) |
| rs433061  | 32122807 | TNXB        | A | D | 9.08E-05 | 1.53(1.23,1.91) | 1.02E-03 | 1.64(1.22,2.19) | 3.41E-02 | 1.48(1.04,2.11) | 3.87E-01 | 1.37(0.68,2.78) |
| rs9268493 | 32483309 | BTNL2       | A | D | 9.20E-05 | 0.63(0.51,0.78) | 8.70E-03 | 0.7(0.53,0.91)  | 3.43E-02 | 0.69(0.49,0.97) | 7.02E-03 | 0.4(0.2,0.77)   |
| rs9268494 | 32483331 | BTNL2       | C | D | 9.25E-05 | 0.63(0.51,0.78) | 8.72E-03 | 0.7(0.53,0.91)  | 3.43E-02 | 0.69(0.49,0.97) | 7.02E-03 | 0.4(0.2,0.77)   |
| rs9268499 | 32483674 | BTNL2       | A | D | 9.49E-05 | 0.63(0.51,0.78) | 8.97E-03 | 0.7(0.53,0.91)  | 3.42E-02 | 0.69(0.49,0.97) | 7.02E-03 | 0.39(0.2,0.77)  |
| rs3132956 | 32287416 | NOTCH4      | A | D | 9.62E-05 | 1.49(1.21,1.85) | 1.57E-04 | 1.72(1.3,2.28)  | 1.41E-01 | 1.3(0.93,1.83)  | 4.21E-01 | 1.34(0.67,2.7)  |
| rs389884  | 32048877 | DOM3Z,STK19 | G | D | 9.98E-05 | 1.53(1.22,1.9)  | 8.98E-04 | 1.64(1.23,2.2)  | 4.17E-02 | 1.46(1.02,2.08) | 3.97E-01 | 1.37(0.68,2.77) |

Supplemental Table S3: Top HLA region associations after adjusting for HLA-DRB1\*1501 and HLA-DRB1\*0301 tag SNPs via logistic regression (P-value genomic control adjusted, associations with  $P < 10^{-2}$ ).

| Marker     | Position | Gene Name | Mode | N    | RA | Meta Best P-value | Meta Best OR (95%CI) | Set I adjusted P-value | Set I OR (95%CI) | Set II adjusted P-value | Set II OR (95%CI) | Set III adjusted P-value | Set III OR (95%CI) |
|------------|----------|-----------|------|------|----|-------------------|----------------------|------------------------|------------------|-------------------------|-------------------|--------------------------|--------------------|
| rs9263871  | 31278508 | HCG27     | D    | 1999 | G  | 8.53E-06          | 1.7(1.35,2.13)       | 7.56E-03               | 1.47(1.11,1.94)  | 5.62E-04                | 1.96(1.34,2.87)   | 1.10E-01                 | 1.85(0.88,3.89)    |
| rs4713447  | 31270942 |           | D    | 1994 | G  | 1.44E-04          | 1.55(1.22,1.96)      | 6.76E-03               | 1.5(1.12,1.99)   | 6.44E-03                | 1.73(1.17,2.55)   | 4.62E-01                 | 1.36(0.61,3)       |
| rs2523589  | 31435313 |           | D    | 1723 | T  | 1.77E-04          | 1.69(1.31,2.19)      | 3.11E-02               | 1.44(1.04,1.98)  | 6.15E-04                | 2.08(1.37,3.16)   |                          |                    |
| rs9404982  | 31274518 | HCG27     | D    | 2021 | G  | 1.90E-04          | 1.54(1.22,1.95)      | 9.00E-03               | 1.47(1.11,1.95)  | 6.42E-03                | 1.73(1.17,2.55)   | 4.50E-01                 | 1.37(0.62,3.04)    |
| rs3868075  | 31275794 | HCG27     | D    | 2021 | G  | 2.23E-04          | 1.54(1.22,1.95)      | 1.06E-02               | 1.46(1.1,1.94)   | 6.47E-03                | 1.73(1.17,2.54)   | 4.39E-01                 | 1.38(0.62,3.07)    |
| rs9263873  | 31278692 | HCG27     | D    | 2012 | T  | 2.47E-04          | 1.54(1.21,1.95)      | 1.03E-02               | 1.46(1.1,1.94)   | 8.35E-03                | 1.7(1.15,2.51)    | 3.98E-01                 | 1.42(0.64,3.17)    |
| rs2074488  | 31348410 |           | D    | 2018 | T  | 2.58E-04          | 1.61(1.21,2.13)      | 8.50E-03               | 1.58(1.13,2.22)  | 4.11E-03                | 1.98(1.25,3.14)   | 9.28E-01                 | 1.06(0.4,2.84)     |
| rs11966332 | 31337680 |           | D    | 2017 | T  | 2.77E-04          | 1.6(1.21,2.12)       | 7.24E-03               | 1.6(1.14,2.23)   | 5.53E-03                | 1.93(1.22,3.04)   | 9.32E-01                 | 1.06(0.4,2.83)     |
| rs11966319 | 31337657 |           | D    | 2017 | T  | 2.79E-04          | 1.6(1.21,2.12)       | 7.25E-03               | 1.6(1.14,2.23)   | 5.53E-03                | 1.93(1.22,3.04)   | 9.32E-01                 | 1.06(0.4,2.83)     |
| rs2074489  | 31348107 |           | D    | 2026 | T  | 4.40E-04          | 1.54(1.22,1.95)      | 2.51E-02               | 1.38(1.05,1.83)  | 9.17E-03                | 1.7(1.15,2.53)    | 2.06E-01                 | 1.67(0.76,3.69)    |
| rs2394963  | 31359441 |           | D    | 2020 | T  | 5.63E-04          | 1.54(1.22,1.95)      | 6.43E-02               | 1.31(0.99,1.72)  | 3.36E-03                | 1.81(1.22,2.67)   | 1.65E-01                 | 1.73(0.8,3.74)     |
| rs3819294  | 31430466 | HLA-B     | D    | 1827 | G  | 5.90E-04          | 2(1.4,2.87)          | 8.71E-02               | 1.49(0.96,2.31)  | 5.13E-04                | 2.89(1.59,5.24)   |                          |                    |
| rs9378249  | 31435680 |           | D    | 1833 | T  | 6.19E-04          | 1.98(1.39,2.84)      | 8.49E-02               | 1.49(0.96,2.29)  | 5.66E-04                | 2.85(1.58,5.16)   |                          |                    |
| rs4628144  | 31365083 |           | D    | 2034 | T  | 6.19E-04          | 1.53(1.22,1.93)      | 6.11E-02               | 1.31(1,1.73)     | 4.01E-03                | 1.78(1.21,2.62)   | 1.77E-01                 | 1.71(0.79,3.7)     |
| rs3906269  | 31366947 |           | D    | 2034 | G  | 6.21E-04          | 1.53(1.22,1.93)      | 6.07E-02               | 1.31(1,1.73)     | 4.01E-03                | 1.78(1.21,2.62)   | 1.81E-01                 | 1.7(0.79,3.68)     |
| rs3873379  | 31370148 |           | D    | 2033 | T  | 6.21E-04          | 1.53(1.22,1.93)      | 5.96E-02               | 1.31(1,1.73)     | 4.02E-03                | 1.78(1.21,2.62)   | 1.88E-01                 | 1.69(0.78,3.65)    |
| rs9468920  | 31362915 |           | D    | 2032 | G  | 6.26E-04          | 1.53(1.22,1.93)      | 6.25E-02               | 1.31(1,1.73)     | 4.02E-03                | 1.78(1.21,2.62)   | 1.72E-01                 | 1.72(0.8,3.71)     |
| rs7754443  | 31362242 |           | D    | 2032 | G  | 6.34E-04          | 1.53(1.22,1.93)      | 6.36E-02               | 1.31(0.99,1.73)  | 4.02E-03                | 1.78(1.21,2.62)   | 1.71E-01                 | 1.72(0.8,3.72)     |
| rs6921663  | 31262599 |           | D    | 2003 | T  | 9.83E-04          | 1.52(1.21,1.91)      | 1.48E-01               | 1.25(0.94,1.65)  | 1.20E-03                | 1.88(1.29,2.76)   | 2.13E-01                 | 1.63(0.76,3.49)    |
| rs16899207 | 31374366 |           | D    | 2014 | G  | 1.01E-03          | 1.51(1.2,1.9)        | 7.26E-02               | 1.3(0.99,1.71)   | 4.96E-03                | 1.76(1.19,2.59)   | 2.21E-01                 | 1.63(0.75,3.53)    |
| rs16899205 | 31374340 |           | D    | 2014 | G  | 1.02E-03          | 1.51(1.2,1.9)        | 7.30E-02               | 1.3(0.99,1.71)   | 4.95E-03                | 1.76(1.19,2.59)   | 2.21E-01                 | 1.63(0.75,3.53)    |
| rs16899213 | 31376121 |           | D    | 2014 | T  | 1.06E-03          | 1.51(1.2,1.9)        | 7.51E-02               | 1.3(0.98,1.71)   | 5.14E-03                | 1.75(1.19,2.59)   | 2.15E-01                 | 1.64(0.76,3.56)    |
| rs9267084  | 31517585 |           | D    | 1938 | G  | 1.09E-03          | 0.58(0.44,0.76)      | 2.61E-02               | 0.68(0.49,0.95)  | 2.10E-01                | 0.74(0.46,1.17)   | 6.77E-04                 | 0.2(0.08,0.51)     |
| rs4713964  | 36437397 |           | A    | 1739 | C  | 1.15E-03          | 1.43(1.17,1.74)      | 7.28E-02               | 1.26(0.99,1.61)  | 2.06E-03                | 1.67(1.21,2.3)    |                          |                    |
| rs9461681  | 31359019 |           | D    | 2024 | G  | 1.21E-03          | 1.51(1.19,1.9)       | 8.20E-02               | 1.29(0.98,1.7)   | 5.59E-03                | 1.74(1.18,2.57)   | 2.01E-01                 | 1.69(0.76,3.73)    |
| rs3873375  | 31359339 |           | D    | 2024 | T  | 1.22E-03          | 1.51(1.19,1.9)       | 8.21E-02               | 1.29(0.98,1.7)   | 5.61E-03                | 1.74(1.18,2.57)   | 2.02E-01                 | 1.69(0.76,3.73)    |
| rs744848   | 36444066 | ETV7      | A    | 1764 | G  | 1.28E-03          | 1.44(1.17,1.76)      | 6.23E-02               | 1.28(1,1.65)     | 3.38E-03                | 1.65(1.18,2.3)    |                          |                    |
| rs1052989  | 31254382 |           | D    | 2024 | T  | 1.39E-03          | 1.51(1.18,1.94)      | 4.06E-02               | 1.38(1.02,1.87)  | 1.20E-02                | 1.71(1.13,2.58)   | 3.91E-01                 | 1.46(0.63,3.43)    |

|            |          |         |   |      |   |          |                 |          |                 |          |                 |          |                 |
|------------|----------|---------|---|------|---|----------|-----------------|----------|-----------------|----------|-----------------|----------|-----------------|
| rs7745906  | 31311988 |         | D | 2029 | G | 1.45E-03 | 1.51(1.16,1.96) | 5.99E-02 | 1.37(1,1.88)    | 3.48E-03 | 1.9(1.24,2.92)  | 7.19E-01 | 1.19(0.49,2.87) |
| rs9366778  | 31377152 |         | D | 2020 | G | 1.45E-03 | 1.46(1.15,1.85) | 3.31E-02 | 1.37(1.03,1.82) | 1.24E-02 | 1.66(1.12,2.45) | 5.40E-01 | 1.3(0.58,2.88)  |
| rs4543367  | 31374746 |         | D | 1942 | G | 1.57E-03 | 1.49(1.18,1.88) | 8.40E-02 | 1.29(0.98,1.71) | 5.71E-03 | 1.76(1.18,2.61) | 2.85E-01 | 1.55(0.7,3.4)   |
| rs11967472 | 31379264 |         | D | 2002 | G | 1.70E-03 | 1.5(1.18,1.89)  | 7.25E-02 | 1.3(0.99,1.71)  | 1.21E-02 | 1.67(1.12,2.47) | 1.68E-01 | 1.77(0.79,3.95) |
| rs6899874  | 31270308 |         | D | 2034 | C | 1.77E-03 | 1.49(1.18,1.87) | 2.01E-01 | 1.22(0.92,1.61) | 1.31E-03 | 1.87(1.28,2.74) | 2.45E-01 | 1.57(0.74,3.34) |
| rs12111032 | 31350170 |         | A | 1832 | G | 1.80E-03 | 1.41(1.14,1.74) | 6.86E-03 | 1.41(1.1,1.8)   | 7.88E-02 | 1.4(0.97,2.03)  |          |                 |
| rs4394275  | 31426157 |         | D | 1764 | G | 1.85E-03 | 1.51(1.19,1.92) | 4.66E-02 | 1.35(1.01,1.81) | 8.12E-03 | 1.73(1.16,2.59) |          |                 |
| rs4122189  | 31275907 | HCG27   | D | 2034 | T | 1.89E-03 | 1.49(1.18,1.87) | 2.04E-01 | 1.21(0.92,1.61) | 1.65E-03 | 1.85(1.26,2.69) | 2.07E-01 | 1.64(0.77,3.52) |
| rs6908994  | 31306689 |         | D | 2033 | T | 1.94E-03 | 1.5(1.15,1.94)  | 7.41E-02 | 1.35(0.98,1.85) | 3.67E-03 | 1.9(1.24,2.91)  | 7.19E-01 | 1.19(0.49,2.87) |
| rs9295957  | 31265573 |         | D | 2002 | G | 1.96E-03 | 1.5(1.17,1.93)  | 5.32E-02 | 1.37(1.01,1.86) | 1.28E-02 | 1.71(1.13,2.6)  | 3.92E-01 | 1.46(0.62,3.4)  |
| rs3905495  | 31373518 |         | D | 2021 | G | 2.07E-03 | 1.44(1.14,1.81) | 5.94E-02 | 1.31(1,1.73)    | 8.68E-03 | 1.69(1.15,2.5)  | 5.16E-01 | 1.3(0.6,2.82)   |
| rs7768431  | 31310644 |         | D | 2035 | G | 2.07E-03 | 1.49(1.15,1.94) | 7.73E-02 | 1.34(0.98,1.84) | 3.77E-03 | 1.89(1.23,2.91) | 7.19E-01 | 1.19(0.49,2.87) |
| rs6921948  | 31279236 | HCG27   | D | 2016 | C | 2.11E-03 | 1.45(1.14,1.85) | 1.03E-01 | 1.29(0.96,1.74) | 1.66E-03 | 1.91(1.28,2.85) | 8.76E-01 | 1.08(0.48,2.46) |
| rs3130216  | 33185249 |         | D | 1717 | G | 2.16E-03 | 0.67(0.52,0.85) | 2.48E-02 | 0.71(0.52,0.95) | 2.43E-02 | 0.62(0.41,0.94) |          |                 |
| rs7451190  | 31282506 |         | D | 2017 | G | 2.19E-03 | 1.45(1.14,1.85) | 1.05E-01 | 1.29(0.96,1.74) | 1.69E-03 | 1.91(1.28,2.85) | 8.73E-01 | 1.08(0.48,2.47) |
| rs3131621  | 31533478 |         | A | 2002 | G | 2.94E-03 | 0.72(0.6,0.87)  | 1.21E-01 | 0.83(0.66,1.04) | 3.13E-02 | 0.71(0.52,0.96) | 2.77E-02 | 0.52(0.29,0.93) |
| rs3873380  | 31370417 |         | D | 2030 | T | 3.09E-03 | 1.41(1.12,1.77) | 5.96E-02 | 1.31(1,1.73)    | 1.18E-02 | 1.65(1.12,2.44) | 6.67E-01 | 1.2(0.56,2.57)  |
| rs9266336  | 31439114 |         | A | 1877 | G | 3.47E-03 | 1.39(1.13,1.72) | 3.32E-02 | 1.31(1.03,1.67) | 2.99E-02 | 1.51(1.05,2.17) |          |                 |
| rs2180106  | 38668193 | BTBD9   | D | 2021 | T | 3.57E-03 | 1.46(1.18,1.82) | 1.14E-01 | 1.25(0.96,1.63) | 4.25E-02 | 1.45(1.02,2.08) | 2.61E-02 | 2.33(1.11,4.89) |
| rs9266359  | 31440718 |         | A | 1884 | T | 3.89E-03 | 1.38(1.12,1.71) | 3.32E-02 | 1.31(1.03,1.67) | 3.46E-02 | 1.48(1.04,2.12) |          |                 |
| rs9461688  | 31379695 |         | D | 2013 | G | 3.93E-03 | 1.45(1.15,1.84) | 1.09E-01 | 1.27(0.96,1.67) | 1.61E-02 | 1.63(1.1,2.41)  | 2.25E-01 | 1.67(0.74,3.75) |
| rs9266375  | 31441854 |         | A | 1884 | G | 3.96E-03 | 1.38(1.12,1.7)  | 3.34E-02 | 1.31(1.03,1.67) | 3.49E-02 | 1.48(1.03,2.12) |          |                 |
| rs9266379  | 31442160 |         | A | 1884 | T | 4.00E-03 | 1.38(1.12,1.7)  | 3.38E-02 | 1.31(1.03,1.67) | 3.49E-02 | 1.48(1.03,2.12) |          |                 |
| rs3129943  | 32446673 | C6orf10 | D | 1986 | G | 4.01E-03 | 1.56(1.16,2.09) | 3.20E-02 | 1.49(1.04,2.12) | 7.50E-02 | 1.58(0.97,2.6)  | 2.89E-01 | 1.7(0.65,4.43)  |
| rs9266381  | 31442771 |         | A | 1884 | T | 4.03E-03 | 1.38(1.12,1.7)  | 3.40E-02 | 1.31(1.03,1.67) | 3.49E-02 | 1.48(1.03,2.12) |          |                 |
| rs9266382  | 31442856 |         | A | 1884 | C | 4.03E-03 | 1.38(1.12,1.7)  | 3.40E-02 | 1.31(1.03,1.67) | 3.50E-02 | 1.48(1.03,2.12) |          |                 |
| rs9266386  | 31443061 |         | A | 1884 | T | 4.05E-03 | 1.38(1.12,1.7)  | 3.40E-02 | 1.31(1.03,1.67) | 3.50E-02 | 1.48(1.03,2.12) |          |                 |
| rs9266387  | 31443195 |         | A | 1884 | T | 4.05E-03 | 1.38(1.12,1.7)  | 3.41E-02 | 1.31(1.03,1.67) | 3.50E-02 | 1.48(1.03,2.12) |          |                 |
| rs9266392  | 31443382 |         | A | 1884 | G | 4.08E-03 | 1.38(1.12,1.7)  | 3.43E-02 | 1.31(1.03,1.67) | 3.50E-02 | 1.48(1.03,2.12) |          |                 |
| rs9266404  | 31444202 |         | A | 1886 | T | 4.15E-03 | 1.38(1.12,1.7)  | 3.48E-02 | 1.31(1.03,1.66) | 3.51E-02 | 1.48(1.03,2.12) |          |                 |
| rs9266406  | 31444398 |         | A | 1886 | G | 4.15E-03 | 1.38(1.12,1.7)  | 3.48E-02 | 1.31(1.03,1.66) | 3.51E-02 | 1.48(1.03,2.12) |          |                 |
| rs9266429  | 31445235 |         | A | 1886 | T | 4.20E-03 | 1.38(1.12,1.7)  | 3.49E-02 | 1.31(1.03,1.66) | 3.54E-02 | 1.48(1.03,2.12) |          |                 |
| rs9266409  | 31444548 |         | A | 1884 | T | 4.32E-03 | 1.38(1.12,1.7)  | 3.62E-02 | 1.3(1.02,1.66)  | 3.51E-02 | 1.48(1.03,2.12) |          |                 |
| rs9368687  | 31448137 |         | A | 1879 | G | 4.56E-03 | 1.38(1.12,1.7)  | 3.53E-02 | 1.31(1.03,1.66) | 3.86E-02 | 1.47(1.03,2.11) |          |                 |
| rs7755619  | 38642912 | BTBD9   | D | 1932 | T | 4.68E-03 | 0.69(0.55,0.86) | 1.66E-01 | 0.82(0.62,1.07) | 2.25E-02 | 0.65(0.45,0.94) | 5.79E-02 | 0.48(0.23,1.02) |
| rs6933050  | 31451612 |         | A | 1877 | T | 4.74E-03 | 1.38(1.12,1.7)  | 3.65E-02 | 1.3(1.02,1.66)  | 3.87E-02 | 1.47(1.03,2.11) |          |                 |

|            |           |         |   |      |   |          |                 |          |                 |          |                 |          |                 |
|------------|-----------|---------|---|------|---|----------|-----------------|----------|-----------------|----------|-----------------|----------|-----------------|
| rs6910516  | 31451807  |         | A | 1877 | G | 4.83E-03 | 1.38(1.12,1.7)  | 3.68E-02 | 1.3(1.02,1.66)  | 3.92E-02 | 1.47(1.03,2.11) |          |                 |
| rs4076112  | 21228748  | CDKAL1  | D | 1983 | G | 4.95E-03 | 1.44(1.15,1.8)  | 1.16E-01 | 1.26(0.96,1.66) | 3.99E-02 | 1.48(1.02,2.14) | 7.33E-02 | 2(0.94,4.23)    |
| rs849870   | 22391865  |         | D | 1864 | T | 5.02E-03 | 0.69(0.54,0.88) | 2.88E-02 | 0.71(0.53,0.96) | 5.52E-02 | 0.66(0.44,1)    |          |                 |
| rs521828   | 32399621  | C6orf10 | D | 2013 | T | 5.15E-03 | 1.54(1.15,2.05) | 6.79E-02 | 1.4(0.99,1.98)  | 3.68E-02 | 1.7(1.04,2.76)  | 3.23E-01 | 1.63(0.63,4.18) |
| rs9466619  | 23207198  |         | D | 1950 | G | 5.20E-03 | 1.52(1.21,1.9)  | 3.75E-01 | 1.15(0.87,1.5)  | 2.05E-02 | 1.56(1.08,2.25) | 2.96E-03 | 3.13(1.48,6.63) |
| rs4713113  | 27663105  |         | R | 1873 | G | 5.20E-03 | 2.17(1.3,3.6)   | 5.09E-02 | 2(1.02,3.93)    | 2.86E-02 | 2.39(1.11,5.17) |          |                 |
| rs7774939  | 27655771  |         | R | 1883 | C | 5.37E-03 | 2.15(1.3,3.54)  | 5.22E-02 | 1.97(1.02,3.81) | 2.86E-02 | 2.39(1.11,5.17) |          |                 |
| rs9295856  | 30488718  |         | R | 1832 | T | 5.37E-03 | 1.64(1.15,2.35) | 2.92E-03 | 1.94(1.26,2.98) | 3.92E-01 | 1.32(0.72,2.42) |          |                 |
| rs4713324  | 30488252  |         | R | 1832 | T | 5.44E-03 | 1.64(1.15,2.35) | 2.92E-03 | 1.94(1.26,2.98) | 3.96E-01 | 1.32(0.72,2.42) |          |                 |
| rs9461583  | not found |         | R | 1834 | T | 5.47E-03 | 1.64(1.15,2.34) | 2.92E-03 | 1.94(1.26,2.98) | 3.97E-01 | 1.32(0.72,2.41) |          |                 |
| rs13208193 | 23185431  |         | D | 2034 | T | 5.64E-03 | 1.51(1.21,1.88) | 4.22E-01 | 1.13(0.87,1.48) | 1.79E-02 | 1.55(1.08,2.23) | 2.50E-03 | 3.17(1.5,6.7)   |
| rs13213112 | 38653970  | BTBD9   | D | 2024 | G | 5.68E-03 | 1.44(1.16,1.79) | 1.40E-01 | 1.23(0.95,1.61) | 5.54E-02 | 1.42(1,2.03)    | 2.61E-02 | 2.33(1.11,4.89) |
| rs4713327  | 30491747  |         | R | 1862 | G | 5.70E-03 | 1.66(1.14,2.4)  | 3.18E-03 | 1.94(1.26,2.99) | 3.87E-01 | 1.35(0.71,2.57) |          |                 |
| rs4345386  | 23185103  |         | D | 2034 | T | 5.80E-03 | 1.51(1.21,1.88) | 4.27E-01 | 1.13(0.86,1.48) | 1.80E-02 | 1.55(1.08,2.22) | 2.50E-03 | 3.17(1.5,6.7)   |
| rs9369022  | 37869542  |         | D | 1717 | T | 5.92E-03 | 1.4(1.12,1.76)  | 3.31E-02 | 1.37(1.03,1.81) | 5.70E-02 | 1.45(1,2.11)    |          |                 |
| rs6903004  | 38644425  | BTBD9   | D | 2008 | G | 5.95E-03 | 0.69(0.56,0.86) | 1.74E-01 | 0.82(0.63,1.07) | 3.42E-02 | 0.67(0.47,0.97) | 4.24E-02 | 0.46(0.22,0.97) |
| rs2523663  | 31547720  |         | R | 1866 | T | 6.00E-03 | 0.54(0.36,0.81) | 4.94E-02 | 0.61(0.38,0.98) | 3.50E-02 | 0.46(0.23,0.94) |          |                 |
| rs9261763  | 30481463  |         | R | 1852 | G | 6.02E-03 | 1.63(1.14,2.32) | 3.47E-03 | 1.91(1.25,2.94) | 3.75E-01 | 1.33(0.74,2.39) |          |                 |
| rs2523715  | 30279263  | TRIM26  | D | 2019 | T | 6.10E-03 | 0.7(0.54,0.9)   | 1.50E-02 | 0.68(0.5,0.92)  | 2.37E-01 | 0.76(0.49,1.17) | 2.77E-01 | 0.62(0.27,1.45) |
| rs2517612  | 30277071  | TRIM26  | D | 2019 | G | 6.12E-03 | 0.7(0.54,0.9)   | 1.50E-02 | 0.68(0.5,0.92)  | 2.37E-01 | 0.76(0.49,1.17) | 2.77E-01 | 0.62(0.27,1.45) |
| rs2523719  | 30276298  | TRIM26  | D | 2019 | T | 6.12E-03 | 0.7(0.54,0.9)   | 1.50E-02 | 0.68(0.5,0.92)  | 2.37E-01 | 0.76(0.49,1.17) | 2.77E-01 | 0.62(0.27,1.45) |
| rs12523660 | 23197478  |         | D | 1984 | T | 6.22E-03 | 1.51(1.21,1.89) | 4.04E-01 | 1.14(0.87,1.49) | 2.05E-02 | 1.56(1.08,2.25) | 3.02E-03 | 3.12(1.47,6.61) |
| rs12524966 | 23196557  |         | D | 1987 | T | 6.26E-03 | 1.51(1.21,1.89) | 4.06E-01 | 1.14(0.87,1.49) | 2.04E-02 | 1.56(1.08,2.25) | 3.00E-03 | 3.12(1.47,6.61) |
| rs10806982 | 24188385  |         | R | 1884 | G | 6.39E-03 | 1.65(1.17,2.34) | 1.90E-02 | 1.66(1.1,2.52)  | 1.11E-01 | 1.64(0.91,2.95) |          |                 |
| rs9266604  | 31453048  |         | D | 1745 | T | 6.53E-03 | 1.39(1.1,1.77)  | 8.34E-03 | 1.48(1.11,1.96) | 2.23E-01 | 1.3(0.87,1.94)  |          |                 |
| rs9461680  | 31351327  |         | A | 1821 | T | 6.66E-03 | 1.39(1.11,1.74) | 5.38E-02 | 1.3(1,1.68)     | 3.59E-02 | 1.53(1.03,2.25) |          |                 |
| rs543532   | 24029596  |         | D | 1866 | T | 6.75E-03 | 1.5(1.13,1.99)  | 1.91E-02 | 1.51(1.08,2.1)  | 1.17E-01 | 1.49(0.92,2.43) |          |                 |
| rs3873386  | 31381725  |         | D | 1826 | T | 6.80E-03 | 1.4(1.1,1.77)   | 1.30E-02 | 1.44(1.09,1.92) | 1.66E-01 | 1.34(0.9,1.99)  |          |                 |
| rs12182794 | 31377863  |         | D | 2006 | T | 6.89E-03 | 1.4(1.11,1.77)  | 2.78E-02 | 1.38(1.04,1.82) | 1.83E-01 | 1.32(0.89,1.97) | 2.09E-01 | 1.65(0.76,3.58) |
| rs545967   | 24032285  |         | D | 1863 | T | 6.90E-03 | 1.5(1.13,1.99)  | 1.94E-02 | 1.5(1.08,2.1)   | 1.19E-01 | 1.49(0.91,2.43) |          |                 |
| rs482180   | 24033759  |         | D | 1863 | T | 6.95E-03 | 1.5(1.13,1.99)  | 1.95E-02 | 1.51(1.08,2.1)  | 1.19E-01 | 1.49(0.91,2.43) |          |                 |
| rs556835   | 24035362  |         | D | 1863 | G | 6.97E-03 | 1.5(1.13,2)     | 1.95E-02 | 1.51(1.08,2.1)  | 1.19E-01 | 1.5(0.92,2.44)  |          |                 |
| rs2523720  | 30274865  | TRIM26  | D | 2003 | T | 6.97E-03 | 0.7(0.54,0.9)   | 1.74E-02 | 0.68(0.5,0.93)  | 2.37E-01 | 0.76(0.49,1.17) | 2.77E-01 | 0.62(0.27,1.45) |
| rs2517613  | 30273641  | TRIM26  | D | 2003 | G | 7.00E-03 | 0.7(0.54,0.9)   | 1.75E-02 | 0.68(0.5,0.93)  | 2.37E-01 | 0.76(0.49,1.17) | 2.77E-01 | 0.62(0.27,1.45) |
| rs481372   | 24033805  |         | D | 1863 | G | 7.00E-03 | 1.5(1.13,1.99)  | 1.94E-02 | 1.51(1.08,2.1)  | 1.20E-01 | 1.49(0.91,2.43) |          |                 |
| rs7775817  | 27656071  |         | R | 1873 | G | 7.02E-03 | 2.11(1.27,3.48) | 6.68E-02 | 1.9(0.98,3.7)   | 2.86E-02 | 2.39(1.11,5.17) |          |                 |

|            |          |         |   |      |   |          |                 |          |                 |          |                 |          |                 |
|------------|----------|---------|---|------|---|----------|-----------------|----------|-----------------|----------|-----------------|----------|-----------------|
| rs488037   | 24034055 |         | D | 1863 | T | 7.04E-03 | 1.5(1.13,1.99)  | 1.95E-02 | 1.5(1.08,2.1)   | 1.20E-01 | 1.49(0.91,2.43) |          |                 |
| rs17543429 | 38664619 | BTBD9   | D | 2021 | T | 7.06E-03 | 0.7(0.56,0.87)  | 1.86E-01 | 0.82(0.63,1.08) | 4.03E-02 | 0.69(0.48,0.98) | 3.84E-02 | 0.46(0.22,0.95) |
| rs12206218 | 38666469 | BTBD9   | D | 2019 | T | 7.12E-03 | 0.7(0.56,0.87)  | 1.87E-01 | 0.82(0.63,1.08) | 4.03E-02 | 0.69(0.48,0.98) | 3.84E-02 | 0.46(0.22,0.95) |
| rs6457422  | 31524135 |         | A | 1962 | G | 7.14E-03 | 1.26(1.07,1.48) | 1.93E-02 | 1.27(1.04,1.55) | 2.15E-01 | 1.2(0.91,1.6)   | 3.10E-01 | 1.33(0.77,2.3)  |
| rs12208087 | 38667467 | BTBD9   | D | 2019 | T | 7.17E-03 | 0.7(0.56,0.87)  | 1.88E-01 | 0.83(0.63,1.08) | 4.03E-02 | 0.69(0.48,0.98) | 3.84E-02 | 0.46(0.22,0.95) |
| rs10484856 | 38667641 | BTBD9   | D | 2019 | T | 7.17E-03 | 0.7(0.56,0.87)  | 1.88E-01 | 0.83(0.63,1.08) | 4.03E-02 | 0.69(0.48,0.98) | 3.84E-02 | 0.46(0.22,0.95) |
| rs3131622  | 31528479 |         | A | 1966 | T | 7.28E-03 | 0.78(0.66,0.93) | 3.02E-02 | 0.79(0.64,0.97) | 1.92E-01 | 0.82(0.62,1.09) | 1.83E-01 | 0.68(0.39,1.19) |
| rs10946938 | 27658775 |         | R | 1856 | C | 7.38E-03 | 1.97(1.24,3.14) | 5.46E-02 | 1.86(1.01,3.42) | 4.00E-02 | 2.13(1.05,4.33) |          |                 |
| rs1406841  | 38684695 | BTBD9   | D | 1962 | C | 7.48E-03 | 0.7(0.56,0.87)  | 1.83E-01 | 0.82(0.62,1.08) | 4.39E-02 | 0.69(0.48,0.98) | 4.01E-02 | 0.46(0.22,0.96) |
| rs2523713  | 30281309 | TRIM26  | D | 1992 | G | 7.57E-03 | 0.72(0.57,0.92) | 3.51E-02 | 0.73(0.55,0.97) | 1.09E-01 | 0.71(0.48,1.07) | 4.18E-01 | 0.72(0.33,1.56) |
| rs1117490  | 30278489 | TRIM26  | D | 1992 | T | 7.58E-03 | 0.72(0.57,0.92) | 3.51E-02 | 0.73(0.55,0.97) | 1.09E-01 | 0.71(0.48,1.07) | 4.18E-01 | 0.72(0.33,1.56) |
| rs2021722  | 30282110 | TRIM26  | D | 1992 | T | 7.58E-03 | 0.72(0.57,0.92) | 3.51E-02 | 0.73(0.55,0.97) | 1.09E-01 | 0.71(0.48,1.07) | 4.18E-01 | 0.72(0.33,1.56) |
| rs2517611  | 30277306 | TRIM26  | D | 1992 | G | 7.58E-03 | 0.72(0.57,0.92) | 3.51E-02 | 0.73(0.55,0.97) | 1.09E-01 | 0.71(0.48,1.07) | 4.18E-01 | 0.72(0.33,1.56) |
| rs2523716  | 30278504 | TRIM26  | D | 1992 | T | 7.58E-03 | 0.72(0.57,0.92) | 3.51E-02 | 0.73(0.55,0.97) | 1.09E-01 | 0.71(0.48,1.07) | 4.18E-01 | 0.72(0.33,1.56) |
| rs971570   | 30280492 | TRIM26  | D | 1992 | C | 7.58E-03 | 0.72(0.57,0.92) | 3.51E-02 | 0.73(0.55,0.97) | 1.09E-01 | 0.71(0.48,1.07) | 4.18E-01 | 0.72(0.33,1.56) |
| rs9468926  | 31368197 |         | D | 1875 | T | 7.96E-03 | 1.44(1.13,1.83) | 1.98E-01 | 1.22(0.92,1.62) | 1.66E-02 | 1.65(1.1,2.47)  | 2.07E-01 | 1.68(0.76,3.74) |
| rs13206291 | 23176183 |         | D | 2029 | G | 8.02E-03 | 1.48(1.19,1.85) | 4.48E-01 | 1.13(0.86,1.47) | 2.05E-02 | 1.54(1.07,2.2)  | 4.57E-03 | 2.96(1.4,6.24)  |
| rs474923   | 24023879 |         | D | 1771 | T | 8.08E-03 | 1.53(1.15,2.05) | 7.38E-02 | 1.39(0.98,1.97) | 2.90E-02 | 1.74(1.07,2.84) |          |                 |
| rs1277137  | 24182956 |         | R | 1884 | G | 8.18E-03 | 1.63(1.15,2.31) | 2.48E-02 | 1.63(1.07,2.46) | 1.11E-01 | 1.64(0.91,2.95) |          |                 |
| rs1290088  | 24184654 |         | R | 1884 | T | 8.18E-03 | 1.63(1.15,2.31) | 2.48E-02 | 1.63(1.07,2.46) | 1.11E-01 | 1.64(0.91,2.95) |          |                 |
| rs2683639  | 24186258 |         | R | 1884 | G | 8.18E-03 | 1.63(1.15,2.31) | 2.48E-02 | 1.63(1.07,2.46) | 1.11E-01 | 1.63(0.91,2.95) |          |                 |
| rs2064364  | 23165852 |         | D | 2029 | G | 8.19E-03 | 1.48(1.19,1.85) | 4.54E-01 | 1.13(0.86,1.47) | 2.05E-02 | 1.54(1.07,2.2)  | 4.57E-03 | 2.96(1.4,6.24)  |
| rs1277136  | 24182859 |         | R | 1884 | G | 8.25E-03 | 1.63(1.15,2.31) | 2.51E-02 | 1.63(1.07,2.46) | 1.11E-01 | 1.63(0.91,2.95) |          |                 |
| rs885912   | 30282612 | TRIM26  | D | 1984 | C | 8.25E-03 | 0.72(0.57,0.92) | 3.74E-02 | 0.73(0.55,0.97) | 1.12E-01 | 0.71(0.47,1.07) | 4.16E-01 | 0.72(0.33,1.57) |
| rs2523721  | 30274245 | TRIM26  | D | 1974 | T | 8.26E-03 | 0.72(0.57,0.92) | 3.85E-02 | 0.73(0.55,0.98) | 1.09E-01 | 0.71(0.48,1.07) | 4.18E-01 | 0.72(0.33,1.56) |
| rs2517614  | 30271934 | TRIM26  | D | 1974 | G | 8.26E-03 | 0.72(0.57,0.92) | 3.86E-02 | 0.73(0.55,0.98) | 1.08E-01 | 0.71(0.48,1.07) | 4.18E-01 | 0.72(0.33,1.56) |
| rs2523722  | 30273252 | TRIM26  | D | 1974 | T | 8.28E-03 | 0.72(0.57,0.92) | 3.86E-02 | 0.73(0.55,0.98) | 1.09E-01 | 0.71(0.48,1.07) | 4.18E-01 | 0.72(0.33,1.56) |
| rs9295576  | 23163490 |         | D | 2028 | T | 8.62E-03 | 1.48(1.19,1.84) | 4.54E-01 | 1.13(0.86,1.47) | 2.05E-02 | 1.54(1.07,2.2)  | 5.39E-03 | 2.91(1.37,6.15) |
| rs3129881  | 32517462 | HLA-DRA | R | 1876 | T | 8.67E-03 | 0.56(0.38,0.81) | 3.25E-01 | 0.77(0.48,1.24) | 1.75E-03 | 0.37(0.2,0.69)  |          |                 |
| rs11967684 | 31307745 |         | D | 1944 | G | 8.69E-03 | 1.35(1.07,1.71) | 6.36E-02 | 1.32(0.99,1.75) | 3.17E-02 | 1.56(1.05,2.32) | 8.91E-01 | 1.07(0.49,2.33) |
| rs9689955  | 24188350 |         | R | 1874 | T | 8.72E-03 | 1.63(1.15,2.3)  | 2.68E-02 | 1.62(1.07,2.45) | 1.10E-01 | 1.64(0.91,2.95) |          |                 |
| rs2596450  | 31546222 |         | R | 1871 | G | 9.38E-03 | 0.54(0.35,0.84) | 5.58E-02 | 0.61(0.38,1)    | 5.23E-02 | 0.47(0.22,0.99) |          |                 |
| rs9393831  | 27696706 |         | R | 1864 | C | 9.38E-03 | 2.12(1.26,3.59) | 7.70E-02 | 1.88(0.96,3.69) | 3.41E-02 | 2.48(1.08,5.66) |          |                 |
| rs2517618  | 30266106 | TRIM26  | D | 2000 | G | 9.42E-03 | 0.71(0.55,0.91) | 2.46E-02 | 0.7(0.51,0.95)  | 2.37E-01 | 0.76(0.49,1.17) | 2.77E-01 | 0.62(0.27,1.45) |
| rs9460965  | 24186238 |         | R | 1874 | T | 9.47E-03 | 1.62(1.14,2.29) | 2.91E-02 | 1.61(1.06,2.43) | 1.11E-01 | 1.63(0.91,2.95) |          |                 |
| rs2395171  | 32502515 |         | R | 1872 | T | 9.47E-03 | 0.5(0.3,0.82)   | 3.14E-02 | 0.48(0.25,0.92) | 1.02E-01 | 0.52(0.24,1.12) |          |                 |

|            |          |  |   |      |   |          |                 |          |                 |          |                 |          |                 |
|------------|----------|--|---|------|---|----------|-----------------|----------|-----------------|----------|-----------------|----------|-----------------|
| rs6457577  | 32499494 |  | R | 1872 | G | 9.47E-03 | 0.5(0.3,0.82)   | 3.16E-02 | 0.48(0.25,0.92) | 1.02E-01 | 0.52(0.24,1.12) |          |                 |
| rs2064193  | 22502049 |  | D | 2021 | T | 9.69E-03 | 0.66(0.5,0.86)  | 1.28E-02 | 0.64(0.46,0.9)  | 7.91E-01 | 0.92(0.6,1.43)  | 1.90E-02 | 0.33(0.13,0.83) |
| rs3135353  | 32500855 |  | R | 1852 | T | 9.71E-03 | 0.48(0.28,0.81) | 3.10E-02 | 0.46(0.23,0.91) | 1.07E-01 | 0.5(0.22,1.14)  |          |                 |
| rs12110752 | 22501454 |  | D | 2034 | T | 9.96E-03 | 0.67(0.51,0.87) | 1.14E-02 | 0.64(0.45,0.9)  | 7.91E-01 | 0.92(0.6,1.43)  | 2.83E-02 | 0.36(0.15,0.89) |

Supplemental Table S4. Association results for non-HLA associations using best genetic model for lupus nephritis(LN) contrasting LN cases with lupus cases without nephritis ( $P < 10^{-4}$ ).

| Marker     | Chr | Position  | Gene Name | RA | N    | Mode | Meta Best P-value | Meta Best OR(95%CI) | Set I P-value | Set I OR(95% CI) | Set II P-value | Set II OR(95% CI) | Set III P-value | Set III OR(95 % CI) |
|------------|-----|-----------|-----------|----|------|------|-------------------|---------------------|---------------|------------------|----------------|-------------------|-----------------|---------------------|
| rs1364989  | 4   | 54706526  |           | T  | 1827 | R    | 4.52E-07          | 3.41(2.1,5.54)      | 1.30E-06      | 4.57(2.48,8.42)  | 3.91E-02       | 2.32(1.06,5.08)   |                 |                     |
| rs274068   | 16  | 24806473  | SLC5A11   | C  | 1838 | R    | 5.08E-07          | 2.85(1.93,4.22)     | 1.40E-03      | 2.26(1.38,3.7)   | 2.91E-05       | 3.87(2.06,7.29)   |                 |                     |
| rs8012283  | 14  | 50303911  | NIN       | G  | 1807 | A    | 5.27E-07          | 1.64(1.35,1.98)     | 3.84E-05      | 1.68(1.31,2.14)  | 2.94E-03       | 1.59(1.17,2.14)   |                 |                     |
| rs7773456  | 6   | 19931217  |           | G  | 1743 | D    | 7.36E-07          | 0.57(0.46,0.7)      | 1.02E-03      | 0.63(0.48,0.83)  | 7.98E-05       | 0.49(0.35,0.7)    |                 |                     |
| rs274069   | 16  | 24806651  | SLC5A11   | T  | 1841 | R    | 8.50E-07          | 2.78(1.88,4.11)     | 1.40E-03      | 2.26(1.38,3.7)   | 5.88E-05       | 3.64(1.95,6.82)   |                 |                     |
| rs7834765  | 8   | 122345087 |           | T  | 1769 | R    | 1.06E-06          | 3.15(1.97,5.03)     | 7.39E-06      | 3.79(2.13,6.76)  | 2.29E-02       | 2.48(1.15,5.35)   |                 |                     |
| rs7834648  | 8   | 122345164 |           | T  | 1768 | R    | 1.07E-06          | 3.15(1.97,5.03)     | 7.42E-06      | 3.79(2.13,6.77)  | 2.30E-02       | 2.47(1.15,5.35)   |                 |                     |
| rs1017280  | 4   | 54705880  |           | T  | 1828 | R    | 1.24E-06          | 3.23(1.99,5.22)     | 4.40E-06      | 4.14(2.27,7.55)  | 3.88E-02       | 2.32(1.06,5.1)    |                 |                     |
| rs6910773  | 6   | 19928637  |           | C  | 1826 | D    | 1.42E-06          | 0.58(0.47,0.72)     | 2.95E-03      | 0.66(0.51,0.87)  | 3.55E-05       | 0.49(0.35,0.69)   |                 |                     |
| rs601162   | 9   | 29622142  |           | A  | 1824 | R    | 1.42E-06          | 3.11(1.99,4.88)     | 5.94E-04      | 2.85(1.58,5.16)  | 4.02E-04       | 3.49(1.75,6.94)   |                 |                     |
| rs12507253 | 4   | 54711576  |           | T  | 1821 | R    | 1.63E-06          | 3.13(1.95,5.03)     | 4.69E-06      | 4.06(2.24,7.36)  | 4.45E-02       | 2.23(1.03,4.82)   |                 |                     |
| rs602469   | 9   | 29622433  |           | C  | 1834 | R    | 1.69E-06          | 3.08(1.97,4.82)     | 6.51E-04      | 2.82(1.57,5.09)  | 4.35E-04       | 3.45(1.74,6.85)   |                 |                     |
| rs8015968  | 14  | 50308509  | NIN       | A  | 1799 | A    | 1.89E-06          | 1.72(1.38,2.15)     | 2.97E-05      | 1.85(1.39,2.46)  | 1.29E-02       | 1.57(1.11,2.23)   |                 |                     |
| rs4140624  | 6   | 19926539  |           | T  | 1803 | D    | 2.18E-06          | 0.58(0.47,0.72)     | 7.96E-04      | 0.61(0.46,0.81)  | 4.77E-04       | 0.54(0.38,0.76)   |                 |                     |
| rs752010   | 1   | 41865602  | HIVEP3    | C  | 1932 | D    | 2.31E-06          | 0.57(0.45,0.71)     | 4.14E-04      | 0.59(0.44,0.79)  | 1.02E-02       | 0.61(0.42,0.89)   | 3.31E-02        | 0.43(0.2,0.93)      |
| rs2077172  | 1   | 41865927  | HIVEP3    | A  | 1932 | D    | 2.31E-06          | 0.57(0.45,0.71)     | 4.16E-04      | 0.59(0.44,0.79)  | 1.01E-02       | 0.61(0.42,0.89)   | 3.31E-02        | 0.43(0.2,0.93)      |
| rs9368127  | 6   | 19919970  |           | A  | 1821 | D    | 2.41E-06          | 0.58(0.47,0.73)     | 7.82E-04      | 0.62(0.47,0.82)  | 5.19E-04       | 0.54(0.38,0.76)   |                 |                     |
| rs9350190  | 6   | 19919639  |           | G  | 1820 | D    | 2.47E-06          | 0.58(0.47,0.73)     | 7.84E-04      | 0.62(0.47,0.82)  | 5.29E-04       | 0.54(0.38,0.76)   |                 |                     |
| rs12500475 | 4   | 54665968  |           | G  | 1743 | R    | 2.64E-06          | 2.94(1.86,4.66)     | 1.26E-05      | 3.54(2.01,6.21)  | 3.39E-02       | 2.31(1.08,4.96)   |                 |                     |
| rs2038978  | 1   | 41867306  | HIVEP3    | A  | 1950 | D    | 2.65E-06          | 0.57(0.45,0.72)     | 4.81E-04      | 0.59(0.44,0.79)  | 1.00E-02       | 0.61(0.42,0.89)   | 3.30E-02        | 0.43(0.2,0.93)      |
| rs967616   | 4   | 172124797 |           | G  | 1920 | A    | 2.86E-06          | 0.69(0.59,0.81)     | 5.34E-05      | 0.66(0.55,0.81)  | 3.24E-02       | 0.74(0.57,0.97)   | 1.29E-01        | 0.67(0.4,1.12)      |
| rs12206194 | 6   | 19927887  |           | C  | 1845 | D    | 3.15E-06          | 0.59(0.47,0.73)     | 9.91E-04      | 0.62(0.47,0.82)  | 5.35E-04       | 0.54(0.39,0.77)   |                 |                     |
| rs6538678  | 12  | 94785700  | CCDC38    | A  | 1832 | A    | 3.33E-06          | 1.57(1.3,1.88)      | 3.55E-04      | 1.52(1.21,1.91)  | 2.04E-03       | 1.63(1.2,2.21)    |                 |                     |
| rs10041935 | 5   | 57250574  |           | C  | 1849 | R    | 3.47E-06          | 2.5(1.71,3.66)      | 3.86E-04      | 2.4(1.49,3.88)   | 1.94E-03       | 2.64(1.44,4.85)   |                 |                     |
| rs4337811  | 5   | 57249936  |           | G  | 1851 | R    | 3.71E-06          | 2.48(1.7,3.6)       | 4.20E-04      | 2.35(1.47,3.77)  | 1.90E-03       | 2.65(1.44,4.86)   |                 |                     |
| rs10027676 | 4   | 54740473  |           | C  | 1736 | R    | 3.91E-06          | 3.08(1.9,5)         | 1.11E-06      | 4.89(2.59,9.21)  | 1.71E-01       | 1.72(0.81,3.63)   |                 |                     |
| rs6664724  | 1   | 41866408  | HIVEP3    | G  | 1892 | D    | 4.27E-06          | 0.57(0.45,0.72)     | 7.69E-04      | 0.6(0.45,0.81)   | 1.01E-02       | 0.61(0.42,0.89)   | 3.31E-02        | 0.43(0.2,0.93)      |
| rs2236178  | 20  | 21090813  | PLK1S1    | T  | 1985 | A    | 4.69E-06          | 0.68(0.58,0.79)     | 4.87E-04      | 0.7(0.58,0.85)   | 5.64E-02       | 0.78(0.61,1)      | 1.67E-03        | 0.45(0.28,0.74)     |
| rs583110   | 9   | 29627044  |           | A  | 1811 | R    | 4.93E-06          | 2.96(1.89,4.64)     | 1.51E-03      | 2.66(1.47,4.83)  | 5.34E-04       | 3.39(1.71,6.75)   |                 |                     |



|            |    |           |              |   |      |   |          |                 |          |                 |          |                 |          |                 |
|------------|----|-----------|--------------|---|------|---|----------|-----------------|----------|-----------------|----------|-----------------|----------|-----------------|
| rs2786111  | 1  | 195572722 | CRB1         | C | 1824 | R | 5.32E-06 | 2.26(1.6,3.19)  | 1.10E-04 | 2.44(1.56,3.82) | 1.10E-02 | 2.04(1.19,3.52) |          |                 |
| rs2478118  | 10 | 13690038  | PRPF18       | T | 1959 | D | 5.44E-06 | 1.61(1.3,1.99)  | 1.43E-03 | 1.57(1.19,2.06) | 1.00E-03 | 1.79(1.27,2.52) | 3.82E-01 | 1.37(0.69,2.72) |
| rs10141242 | 14 | 50297072  | NIN          | C | 1849 | A | 6.12E-06 | 1.6(1.3,1.97)   | 9.40E-06 | 1.82(1.4,2.37)  | 7.80E-02 | 1.36(0.97,1.89) |          |                 |
| rs4083593  | 1  | 41872170  | HIVEP3       | A | 1894 | D | 6.77E-06 | 0.58(0.46,0.73) | 1.40E-03 | 0.62(0.47,0.83) | 8.23E-03 | 0.61(0.42,0.88) | 3.53E-02 | 0.44(0.2,0.94)  |
| rs2786115  | 1  | 195569313 | CRB1         | A | 1702 | R | 7.07E-06 | 2.25(1.59,3.18) | 3.74E-04 | 2.19(1.43,3.37) | 4.43E-03 | 2.31(1.3,4.11)  |          |                 |
| rs13139444 | 4  | 172127251 |              | A | 1964 | A | 7.89E-06 | 0.7(0.6,0.82)   | 1.50E-04 | 0.68(0.56,0.83) | 4.04E-02 | 0.75(0.58,0.98) | 1.10E-01 | 0.65(0.39,1.1)  |
| rs2567952  | 4  | 172129725 |              | C | 1964 | A | 8.06E-06 | 0.7(0.6,0.82)   | 1.53E-04 | 0.68(0.56,0.83) | 4.04E-02 | 0.75(0.58,0.98) | 1.10E-01 | 0.65(0.39,1.1)  |
| rs2661917  | 4  | 172129968 |              | C | 1964 | A | 8.06E-06 | 0.7(0.6,0.82)   | 1.53E-04 | 0.68(0.56,0.83) | 4.04E-02 | 0.75(0.58,0.98) | 1.10E-01 | 0.65(0.39,1.1)  |
| rs2661923  | 4  | 172127242 |              | C | 1981 | A | 8.13E-06 | 0.7(0.6,0.82)   | 1.69E-04 | 0.68(0.56,0.83) | 3.17E-02 | 0.74(0.57,0.97) | 1.50E-01 | 0.68(0.4,1.14)  |
| rs2567956  | 4  | 172126317 |              | C | 1993 | A | 8.14E-06 | 0.7(0.6,0.83)   | 1.54E-04 | 0.68(0.56,0.83) | 3.13E-02 | 0.74(0.57,0.97) | 1.73E-01 | 0.69(0.41,1.17) |
| rs1236448  | 4  | 172118655 |              | C | 1993 | A | 8.14E-06 | 0.7(0.6,0.83)   | 1.54E-04 | 0.68(0.56,0.83) | 3.13E-02 | 0.74(0.57,0.97) | 1.73E-01 | 0.69(0.41,1.17) |
| rs17245674 | 4  | 172121285 |              | A | 1993 | A | 8.14E-06 | 0.7(0.6,0.83)   | 1.54E-04 | 0.68(0.56,0.83) | 3.13E-02 | 0.74(0.57,0.97) | 1.73E-01 | 0.69(0.41,1.17) |
| rs2567960  | 4  | 172122108 |              | T | 1992 | A | 8.16E-06 | 0.7(0.6,0.83)   | 1.54E-04 | 0.68(0.56,0.83) | 3.13E-02 | 0.74(0.57,0.97) | 1.73E-01 | 0.69(0.41,1.17) |
| rs17186543 | 4  | 172126746 |              | T | 1993 | A | 8.16E-06 | 0.7(0.6,0.83)   | 1.54E-04 | 0.68(0.56,0.83) | 3.14E-02 | 0.74(0.57,0.97) | 1.73E-01 | 0.69(0.41,1.17) |
| rs12331863 | 4  | 172133772 |              | G | 1981 | A | 8.33E-06 | 0.7(0.6,0.82)   | 1.75E-04 | 0.68(0.56,0.83) | 3.17E-02 | 0.74(0.57,0.97) | 1.49E-01 | 0.68(0.4,1.14)  |
| rs13041255 | 20 | 21078707  | PLK1S1       | T | 1999 | A | 8.42E-06 | 0.69(0.59,0.8)  | 1.02E-03 | 0.72(0.59,0.87) | 5.10E-02 | 0.78(0.61,1)    | 1.58E-03 | 0.45(0.28,0.74) |
| rs4813414  | 20 | 21081212  | PLK1S1       | A | 1999 | A | 8.42E-06 | 0.69(0.59,0.8)  | 1.02E-03 | 0.72(0.59,0.87) | 5.10E-02 | 0.78(0.61,1)    | 1.58E-03 | 0.45(0.28,0.74) |
| rs4815022  | 20 | 21072872  | PLK1S1       | T | 1999 | A | 8.42E-06 | 0.68(0.59,0.8)  | 1.02E-03 | 0.72(0.59,0.87) | 5.10E-02 | 0.78(0.61,1)    | 1.58E-03 | 0.45(0.28,0.74) |
| rs6047274  | 20 | 21083126  | PLK1S1       | T | 1998 | A | 8.43E-06 | 0.69(0.59,0.8)  | 1.02E-03 | 0.72(0.59,0.87) | 5.10E-02 | 0.78(0.61,1)    | 1.58E-03 | 0.45(0.28,0.74) |
| rs1884763  | 20 | 21076127  | PLK1S1       | A | 1999 | A | 8.43E-06 | 0.69(0.59,0.8)  | 1.02E-03 | 0.72(0.59,0.87) | 5.10E-02 | 0.78(0.61,1)    | 1.58E-03 | 0.45(0.28,0.74) |
| rs3762194  | 20 | 21074723  | PLK1S1       | A | 1999 | A | 8.48E-06 | 0.69(0.59,0.8)  | 1.02E-03 | 0.72(0.59,0.87) | 5.10E-02 | 0.78(0.61,1)    | 1.58E-03 | 0.45(0.28,0.74) |
| rs4815024  | 20 | 21086367  | PLK1S1       | C | 1997 | A | 8.69E-06 | 0.69(0.59,0.8)  | 1.05E-03 | 0.72(0.59,0.87) | 5.10E-02 | 0.78(0.61,1)    | 1.58E-03 | 0.45(0.28,0.74) |
| rs2093069  | 20 | 21088342  | PLK1S1       | C | 1997 | A | 8.84E-06 | 0.69(0.59,0.8)  | 1.07E-03 | 0.72(0.59,0.87) | 5.10E-02 | 0.78(0.61,1)    | 1.58E-03 | 0.45(0.28,0.74) |
| rs6811337  | 4  | 172176299 |              | T | 1970 | A | 8.91E-06 | 0.7(0.6,0.83)   | 1.62E-04 | 0.68(0.56,0.83) | 3.26E-02 | 0.74(0.57,0.97) | 1.73E-01 | 0.69(0.41,1.17) |
| rs6047279  | 20 | 21090353  | PLK1S1       | T | 1997 | A | 9.01E-06 | 0.69(0.59,0.8)  | 1.09E-03 | 0.72(0.59,0.88) | 5.10E-02 | 0.78(0.61,1)    | 1.58E-03 | 0.45(0.28,0.74) |
| rs17246620 | 4  | 172199835 | LOC100506122 | G | 1981 | A | 9.50E-06 | 0.71(0.6,0.83)  | 1.67E-04 | 0.68(0.56,0.83) | 3.37E-02 | 0.75(0.57,0.97) | 1.74E-01 | 0.69(0.41,1.17) |
| rs11157764 | 14 | 50320087  | NIN          | A | 1773 | A | 1.07E-05 | 1.67(1.34,2.1)  | 2.37E-04 | 1.74(1.3,2.33)  | 1.09E-02 | 1.59(1.12,2.27) |          |                 |
| rs648705   | 13 | 109654154 | COL4A1       | A | 1810 | R | 1.09E-05 | 0.48(0.34,0.66) | 5.87E-05 | 0.42(0.28,0.64) | 3.49E-02 | 0.57(0.34,0.95) |          |                 |
| rs1396323  | 4  | 172142182 |              | A | 1970 | A | 1.10E-05 | 0.71(0.61,0.84) | 1.11E-04 | 0.68(0.55,0.82) | 4.71E-02 | 0.76(0.59,0.99) | 2.12E-01 | 0.71(0.42,1.2)  |
| rs7681844  | 4  | 172142671 |              | C | 1970 | A | 1.11E-05 | 0.71(0.61,0.84) | 1.12E-04 | 0.68(0.55,0.82) | 4.73E-02 | 0.76(0.59,0.99) | 2.12E-01 | 0.71(0.42,1.2)  |
| rs4815021  | 20 | 21068543  | PLK1S1       | C | 1895 | A | 1.12E-05 | 0.69(0.59,0.8)  | 1.12E-03 | 0.72(0.59,0.88) | 6.04E-02 | 0.78(0.61,1.01) | 1.67E-03 | 0.45(0.28,0.74) |
| rs13148831 | 4  | 172146081 |              | T | 1970 | A | 1.13E-05 | 0.71(0.61,0.84) | 1.13E-04 | 0.68(0.56,0.82) | 4.73E-02 | 0.76(0.59,0.99) | 2.12E-01 | 0.71(0.42,1.2)  |
| rs2332086  | 4  | 172147756 |              | G | 1970 | A | 1.13E-05 | 0.71(0.61,0.84) | 1.14E-04 | 0.68(0.56,0.82) | 4.73E-02 | 0.76(0.59,0.99) | 2.12E-01 | 0.71(0.42,1.2)  |
| rs6047293  | 20 | 21102487  | PLK1S1       | G | 1997 | A | 1.13E-05 | 0.69(0.59,0.8)  | 1.38E-03 | 0.73(0.6,0.88)  | 5.05E-02 | 0.78(0.61,1)    | 1.58E-03 | 0.45(0.28,0.74) |
| rs6082339  | 20 | 21100742  | PLK1S1       | G | 1997 | A | 1.13E-05 | 0.69(0.59,0.8)  | 1.38E-03 | 0.73(0.6,0.88)  | 5.05E-02 | 0.78(0.61,1)    | 1.58E-03 | 0.45(0.28,0.74) |
| rs910975   | 20 | 21104169  | PLK1S1       | A | 1997 | A | 1.13E-05 | 0.69(0.59,0.8)  | 1.38E-03 | 0.73(0.6,0.88)  | 5.05E-02 | 0.78(0.61,1)    | 1.58E-03 | 0.45(0.28,0.74) |

|            |    |           |              |   |      |   |          |                 |          |                 |          |                 |          |                 |
|------------|----|-----------|--------------|---|------|---|----------|-----------------|----------|-----------------|----------|-----------------|----------|-----------------|
| rs2093070  | 20 | 21105510  | PLK1S1       | T | 1997 | A | 1.13E-05 | 0.69(0.59,0.8)  | 1.38E-03 | 0.73(0.6,0.88)  | 5.05E-02 | 0.78(0.61,1)    | 1.58E-03 | 0.45(0.28,0.74) |
| rs6515144  | 20 | 21105565  | PLK1S1       | T | 1997 | A | 1.13E-05 | 0.69(0.59,0.8)  | 1.38E-03 | 0.73(0.6,0.88)  | 5.05E-02 | 0.78(0.61,1)    | 1.58E-03 | 0.45(0.28,0.74) |
| rs7834813  | 8  | 122345329 |              | C | 1736 | R | 1.14E-05 | 2.69(1.72,4.23) | 2.74E-05 | 3.33(1.91,5.81) | 6.42E-02 | 2.04(0.97,4.29) |          |                 |
| rs6035795  | 20 | 21093885  | PLK1S1       | A | 1997 | A | 1.14E-05 | 0.69(0.59,0.8)  | 1.37E-03 | 0.73(0.6,0.88)  | 5.10E-02 | 0.78(0.61,1)    | 1.58E-03 | 0.45(0.28,0.74) |
| rs6047281  | 20 | 21094287  | PLK1S1       | A | 1998 | A | 1.14E-05 | 0.69(0.59,0.8)  | 1.37E-03 | 0.73(0.6,0.88)  | 5.10E-02 | 0.78(0.61,1)    | 1.58E-03 | 0.45(0.28,0.74) |
| rs7682721  | 4  | 172151045 |              | T | 1970 | A | 1.14E-05 | 0.71(0.61,0.84) | 1.16E-04 | 0.68(0.56,0.82) | 4.73E-02 | 0.76(0.59,0.99) | 2.12E-01 | 0.71(0.42,1.2)  |
| rs2399985  | 10 | 13685216  | PRPF18       | T | 1785 | D | 1.16E-05 | 1.65(1.33,2.06) | 1.64E-03 | 1.58(1.19,2.08) | 1.42E-03 | 1.76(1.25,2.48) |          |                 |
| rs6827582  | 4  | 172179792 |              | A | 1982 | A | 1.17E-05 | 0.71(0.6,0.83)  | 2.10E-04 | 0.68(0.56,0.83) | 3.38E-02 | 0.75(0.57,0.97) | 1.74E-01 | 0.69(0.41,1.17) |
| rs6811103  | 4  | 172176175 |              | T | 1984 | A | 1.17E-05 | 0.71(0.6,0.83)  | 2.42E-04 | 0.69(0.56,0.84) | 3.26E-02 | 0.74(0.57,0.97) | 1.53E-01 | 0.68(0.4,1.15)  |
| rs4901055  | 14 | 50296750  | NIN          | G | 1834 | A | 1.17E-05 | 1.58(1.29,1.95) | 1.72E-05 | 1.79(1.38,2.34) | 8.67E-02 | 1.35(0.97,1.87) |          |                 |
| rs402031   | 1  | 165217082 |              | G | 1722 | R | 1.18E-05 | 0.54(0.4,0.71)  | 3.07E-05 | 0.47(0.33,0.67) | 6.09E-02 | 0.64(0.41,1.01) |          |                 |
| rs11735676 | 4  | 172177663 |              | T | 1983 | A | 1.21E-05 | 0.71(0.6,0.83)  | 2.29E-04 | 0.69(0.56,0.84) | 3.26E-02 | 0.74(0.57,0.97) | 1.73E-01 | 0.69(0.41,1.17) |
| rs10012648 | 4  | 172177040 |              | C | 1983 | A | 1.21E-05 | 0.71(0.6,0.83)  | 2.30E-04 | 0.69(0.56,0.84) | 3.26E-02 | 0.74(0.57,0.97) | 1.73E-01 | 0.69(0.41,1.17) |
| rs13151801 | 4  | 172176859 |              | T | 1983 | A | 1.21E-05 | 0.71(0.6,0.83)  | 2.30E-04 | 0.69(0.56,0.84) | 3.26E-02 | 0.74(0.57,0.97) | 1.73E-01 | 0.69(0.41,1.17) |
| rs7673070  | 4  | 172176632 |              | C | 1983 | A | 1.21E-05 | 0.71(0.6,0.83)  | 2.29E-04 | 0.69(0.56,0.84) | 3.28E-02 | 0.74(0.57,0.97) | 1.73E-01 | 0.69(0.41,1.17) |
| rs6812562  | 4  | 172177061 |              | A | 1983 | A | 1.21E-05 | 0.71(0.6,0.83)  | 2.29E-04 | 0.69(0.56,0.84) | 3.28E-02 | 0.74(0.57,0.97) | 1.73E-01 | 0.69(0.41,1.17) |
| rs13138342 | 4  | 172177180 |              | C | 1983 | A | 1.21E-05 | 0.71(0.6,0.83)  | 2.29E-04 | 0.69(0.56,0.84) | 3.28E-02 | 0.74(0.57,0.97) | 1.73E-01 | 0.69(0.41,1.17) |
| rs6553556  | 4  | 172176526 |              | A | 1983 | A | 1.21E-05 | 0.71(0.6,0.83)  | 2.29E-04 | 0.69(0.56,0.84) | 3.28E-02 | 0.74(0.57,0.97) | 1.73E-01 | 0.69(0.41,1.17) |
| rs12648447 | 4  | 172175669 |              | T | 1985 | A | 1.27E-05 | 0.71(0.6,0.83)  | 2.42E-04 | 0.69(0.56,0.84) | 3.26E-02 | 0.74(0.57,0.97) | 1.72E-01 | 0.7(0.42,1.16)  |
| rs25511    | 4  | 172175559 |              | T | 1985 | A | 1.27E-05 | 0.71(0.6,0.83)  | 2.42E-04 | 0.69(0.56,0.84) | 3.26E-02 | 0.74(0.57,0.97) | 1.73E-01 | 0.69(0.41,1.17) |
| rs9968437  | 4  | 172173406 |              | T | 1985 | A | 1.27E-05 | 0.71(0.6,0.83)  | 2.42E-04 | 0.69(0.56,0.84) | 3.26E-02 | 0.74(0.57,0.97) | 1.73E-01 | 0.69(0.41,1.17) |
| rs1605651  | 4  | 172162912 |              | A | 1985 | A | 1.28E-05 | 0.71(0.6,0.83)  | 2.41E-04 | 0.69(0.56,0.84) | 3.28E-02 | 0.74(0.57,0.97) | 1.73E-01 | 0.69(0.41,1.17) |
| rs11132865 | 4  | 172164946 |              | C | 1985 | A | 1.28E-05 | 0.71(0.6,0.83)  | 2.42E-04 | 0.69(0.56,0.84) | 3.26E-02 | 0.74(0.57,0.97) | 1.73E-01 | 0.69(0.41,1.17) |
| rs13115632 | 4  | 172164388 |              | G | 1985 | A | 1.28E-05 | 0.71(0.6,0.83)  | 2.42E-04 | 0.69(0.56,0.84) | 3.26E-02 | 0.74(0.57,0.97) | 1.73E-01 | 0.69(0.41,1.17) |
| rs1396325  | 4  | 172167776 |              | G | 1985 | A | 1.28E-05 | 0.71(0.6,0.83)  | 2.42E-04 | 0.69(0.56,0.84) | 3.26E-02 | 0.74(0.57,0.97) | 1.73E-01 | 0.69(0.41,1.17) |
| rs4692627  | 4  | 172165637 |              | T | 1985 | A | 1.28E-05 | 0.71(0.6,0.83)  | 2.42E-04 | 0.69(0.56,0.84) | 3.26E-02 | 0.74(0.57,0.97) | 1.73E-01 | 0.69(0.41,1.17) |
| rs1508507  | 4  | 172172780 |              | A | 1985 | A | 1.28E-05 | 0.71(0.6,0.83)  | 2.42E-04 | 0.69(0.56,0.84) | 3.28E-02 | 0.74(0.57,0.97) | 1.73E-01 | 0.69(0.41,1.17) |
| rs25510    | 4  | 172175579 |              | A | 1985 | A | 1.28E-05 | 0.71(0.6,0.83)  | 2.42E-04 | 0.69(0.56,0.84) | 3.28E-02 | 0.74(0.57,0.97) | 1.73E-01 | 0.69(0.41,1.17) |
| rs25512    | 4  | 172175532 |              | G | 1985 | A | 1.28E-05 | 0.71(0.6,0.83)  | 2.42E-04 | 0.69(0.56,0.84) | 3.28E-02 | 0.74(0.57,0.97) | 1.73E-01 | 0.69(0.41,1.17) |
| rs6849128  | 4  | 172176001 |              | A | 1985 | A | 1.28E-05 | 0.71(0.6,0.83)  | 2.42E-04 | 0.69(0.56,0.84) | 3.28E-02 | 0.74(0.57,0.97) | 1.73E-01 | 0.69(0.41,1.17) |
| rs6858075  | 4  | 172172043 |              | A | 1985 | A | 1.28E-05 | 0.71(0.6,0.83)  | 2.42E-04 | 0.69(0.56,0.84) | 3.28E-02 | 0.74(0.57,0.97) | 1.73E-01 | 0.69(0.41,1.17) |
| rs8120293  | 20 | 21116395  | PLK1S1       | T | 1991 | A | 1.30E-05 | 0.69(0.59,0.8)  | 1.58E-03 | 0.73(0.6,0.88)  | 5.05E-02 | 0.78(0.61,1)    | 1.58E-03 | 0.45(0.28,0.74) |
| rs8120377  | 20 | 21116361  | PLK1S1       | T | 1991 | A | 1.30E-05 | 0.69(0.59,0.8)  | 1.58E-03 | 0.73(0.6,0.88)  | 5.05E-02 | 0.78(0.61,1)    | 1.58E-03 | 0.45(0.28,0.74) |
| rs765585   | 20 | 21119172  | PLK1S1       | T | 1991 | A | 1.30E-05 | 0.69(0.59,0.8)  | 1.58E-03 | 0.73(0.6,0.88)  | 5.05E-02 | 0.78(0.61,1)    | 1.58E-03 | 0.45(0.28,0.74) |
| rs393025   | 1  | 165211552 |              | A | 1745 | R | 1.32E-05 | 0.54(0.41,0.71) | 3.56E-05 | 0.47(0.33,0.67) | 6.05E-02 | 0.64(0.41,1.01) |          |                 |
| rs17187123 | 4  | 172206354 | LOC100506122 | A | 1935 | A | 1.36E-05 | 0.71(0.61,0.84) | 1.95E-04 | 0.68(0.56,0.83) | 3.65E-02 | 0.75(0.57,0.98) | 2.14E-01 | 0.72(0.43,1.2)  |

|            |    |           |              |   |      |   |          |                 |          |                 |          |                 |          |                 |
|------------|----|-----------|--------------|---|------|---|----------|-----------------|----------|-----------------|----------|-----------------|----------|-----------------|
| rs6047280  | 20 | 21091935  | PLK1S1       | G | 1988 | A | 1.37E-05 | 0.69(0.59,0.8)  | 1.47E-03 | 0.73(0.6,0.88)  | 6.42E-02 | 0.79(0.62,1.01) | 9.84E-04 | 0.43(0.26,0.71) |
| rs7973213  | 12 | 24067564  | SOX5         | C | 1988 | D | 1.37E-05 | 0.59(0.46,0.76) | 1.06E-03 | 0.56(0.4,0.79)  | 1.20E-03 | 0.51(0.34,0.76) | 9.99E-01 | 0.98(0.46,2.12) |
| rs12823336 | 12 | 24068461  | SOX5         | C | 1989 | D | 1.38E-05 | 0.59(0.46,0.76) | 1.06E-03 | 0.57(0.4,0.79)  | 1.20E-03 | 0.51(0.34,0.76) | 9.99E-01 | 0.98(0.46,2.12) |
| rs17246878 | 4  | 172208800 | LOC100506122 | T | 1935 | A | 1.39E-05 | 0.71(0.61,0.84) | 2.00E-04 | 0.68(0.56,0.83) | 3.65E-02 | 0.75(0.57,0.98) | 2.14E-01 | 0.72(0.43,1.2)  |
| rs7307316  | 12 | 24072675  | SOX5         | G | 1992 | D | 1.40E-05 | 0.59(0.46,0.76) | 1.07E-03 | 0.56(0.4,0.79)  | 1.25E-03 | 0.51(0.34,0.76) | 9.77E-01 | 0.98(0.45,2.09) |
| rs17403340 | 12 | 24069147  | SOX5         | C | 1989 | D | 1.41E-05 | 0.6(0.46,0.77)  | 1.07E-03 | 0.57(0.4,0.79)  | 1.22E-03 | 0.51(0.34,0.76) | 9.98E-01 | 0.99(0.46,2.12) |
| rs2478106  | 10 | 13668534  |              | C | 1760 | D | 1.42E-05 | 1.66(1.33,2.06) | 2.42E-03 | 1.55(1.17,2.06) | 1.07E-03 | 1.8(1.27,2.55)  |          |                 |
| rs17481181 | 12 | 24063813  | SOX5         | G | 1983 | D | 1.43E-05 | 0.59(0.46,0.76) | 1.10E-03 | 0.56(0.4,0.79)  | 1.20E-03 | 0.51(0.34,0.76) |          | 0.98(0.46,2.12) |
| rs4963737  | 12 | 24063482  | SOX5         | C | 1983 | D | 1.43E-05 | 0.59(0.46,0.76) | 1.11E-03 | 0.56(0.4,0.79)  | 1.20E-03 | 0.51(0.34,0.76) | 9.99E-01 | 0.98(0.46,2.12) |
| rs879064   | 20 | 21123550  | PLK1S1       | C | 1991 | A | 1.45E-05 | 0.69(0.59,0.8)  | 1.58E-03 | 0.73(0.6,0.88)  | 5.05E-02 | 0.78(0.61,1)    | 2.11E-03 | 0.46(0.28,0.75) |
| rs1508296  | 4  | 172208949 | LOC100506122 | C | 1976 | A | 1.49E-05 | 0.71(0.61,0.83) | 2.22E-04 | 0.69(0.56,0.84) | 4.04E-02 | 0.75(0.58,0.98) | 1.72E-01 | 0.69(0.41,1.17) |
| rs13110268 | 4  | 172211262 | LOC100506122 | G | 1976 | A | 1.50E-05 | 0.71(0.61,0.83) | 2.24E-04 | 0.69(0.56,0.84) | 4.02E-02 | 0.75(0.58,0.98) | 1.73E-01 | 0.69(0.41,1.17) |
| rs7340816  | 4  | 172179585 |              | A | 1944 | A | 1.51E-05 | 0.71(0.6,0.83)  | 2.63E-04 | 0.69(0.56,0.84) | 3.60E-02 | 0.75(0.57,0.98) | 1.67E-01 | 0.69(0.41,1.16) |
| rs9559744  | 13 | 109659445 | COL4A1       | T | 1824 | R | 1.52E-05 | 0.49(0.35,0.67) | 9.29E-05 | 0.43(0.29,0.66) | 3.37E-02 | 0.56(0.33,0.95) |          |                 |
| rs2593753  | 11 | 45719573  |              | G | 1738 | D | 1.67E-05 | 0.61(0.49,0.76) | 2.55E-03 | 0.65(0.5,0.86)  | 1.18E-03 | 0.56(0.39,0.79) |          |                 |
| rs10505927 | 12 | 24070940  | SOX5         | A | 1976 | D | 1.67E-05 | 0.59(0.46,0.77) | 1.24E-03 | 0.56(0.4,0.79)  | 1.28E-03 | 0.51(0.34,0.76) | 9.95E-01 | 0.98(0.46,2.12) |
| rs6047273  | 20 | 21082799  | PLK1S1       | T | 1991 | A | 1.73E-05 | 0.69(0.59,0.8)  | 2.05E-03 | 0.73(0.61,0.89) | 5.10E-02 | 0.78(0.61,1)    | 1.58E-03 | 0.45(0.28,0.74) |
| rs2155099  | 11 | 93961634  | PIWIL4       | C | 1943 | A | 1.73E-05 | 0.71(0.61,0.83) | 1.96E-03 | 0.74(0.61,0.89) | 1.14E-02 | 0.73(0.57,0.93) | 5.95E-02 | 0.62(0.38,1.02) |
| rs598893   | 13 | 109657744 | COL4A1       | C | 1834 | R | 1.75E-05 | 0.49(0.35,0.68) | 1.02E-04 | 0.44(0.29,0.66) | 3.52E-02 | 0.57(0.34,0.95) |          |                 |
| rs10831246 | 11 | 93962343  | PIWIL4       | C | 1943 | A | 1.77E-05 | 0.71(0.61,0.83) | 1.95E-03 | 0.74(0.61,0.89) | 1.17E-02 | 0.73(0.57,0.93) | 6.02E-02 | 0.62(0.38,1.02) |
| rs7110167  | 11 | 93959885  | PIWIL4       | C | 1943 | A | 1.77E-05 | 0.71(0.61,0.83) | 2.01E-03 | 0.74(0.61,0.89) | 1.14E-02 | 0.73(0.57,0.93) | 5.95E-02 | 0.62(0.38,1.02) |
| rs2155100  | 11 | 93961046  | PIWIL4       | T | 1943 | A | 1.77E-05 | 0.71(0.61,0.83) | 1.98E-03 | 0.74(0.61,0.89) | 1.16E-02 | 0.73(0.57,0.93) | 5.99E-02 | 0.62(0.38,1.02) |
| rs482757   | 13 | 109655824 | COL4A1       | C | 1835 | R | 1.80E-05 | 0.49(0.35,0.68) | 1.05E-04 | 0.44(0.29,0.66) | 3.53E-02 | 0.57(0.34,0.95) |          |                 |
| rs677877   | 13 | 109655896 | COL4A1       | A | 1835 | R | 1.80E-05 | 0.49(0.35,0.68) | 1.06E-04 | 0.44(0.29,0.66) | 3.53E-02 | 0.57(0.34,0.95) |          |                 |
| rs645098   | 13 | 109654272 | COL4A1       | C | 1808 | R | 1.80E-05 | 0.48(0.34,0.67) | 8.98E-05 | 0.42(0.27,0.65) | 4.13E-02 | 0.56(0.33,0.97) |          |                 |
| rs10831244 | 11 | 93954955  | PIWIL4       | A | 1948 | A | 1.84E-05 | 0.71(0.61,0.83) | 2.05E-03 | 0.74(0.61,0.89) | 1.14E-02 | 0.73(0.57,0.93) | 5.97E-02 | 0.62(0.38,1.02) |
| rs538390   | 13 | 109653678 | COL4A1       | G | 1806 | R | 1.84E-05 | 0.48(0.34,0.67) | 9.14E-05 | 0.42(0.27,0.65) | 4.13E-02 | 0.56(0.33,0.97) |          |                 |
| rs2786113  | 1  | 195570704 | CRB1         | T | 1835 | R | 1.87E-05 | 2.09(1.5,2.91)  | 4.26E-04 | 2.12(1.4,3.21)  | 1.08E-02 | 2.04(1.19,3.52) |          |                 |
| rs6681441  | 1  | 41870908  | HIVEP3       | G | 1937 | D | 1.90E-05 | 0.59(0.47,0.74) | 3.24E-03 | 0.64(0.48,0.86) | 9.68E-03 | 0.61(0.43,0.88) | 3.43E-02 | 0.44(0.2,0.94)  |
| rs2567957  | 4  | 172126198 |              | G | 1926 | A | 1.94E-05 | 0.73(0.63,0.84) | 7.53E-05 | 0.69(0.57,0.83) | 1.97E-01 | 0.85(0.66,1.08) | 4.05E-02 | 0.61(0.38,0.98) |
| rs2821131  | 1  | 195569025 | CRB1         | T | 1822 | R | 1.99E-05 | 2.09(1.5,2.91)  | 4.55E-04 | 2.12(1.4,3.21)  | 1.07E-02 | 2.04(1.19,3.52) |          |                 |
| rs7153562  | 14 | 50301048  | NIN          | C | 1816 | A | 2.02E-05 | 1.46(1.23,1.74) | 6.72E-05 | 1.58(1.26,1.97) | 5.36E-02 | 1.32(1,1.75)    |          |                 |
| rs12832769 | 12 | 124576288 | TMEM132B     | T | 1757 | R | 2.06E-05 | 2.66(1.74,4.07) | 1.60E-02 | 1.97(1.15,3.38) | 7.09E-05 | 3.97(2.02,7.8)  |          |                 |
| rs11058220 | 12 | 124574011 | TMEM132B     | A | 1844 | R | 2.13E-05 | 2.55(1.7,3.84)  | 1.32E-02 | 1.97(1.16,3.32) | 1.16E-04 | 3.58(1.88,6.81) |          |                 |
| rs10789405 | 1  | 41874549  | HIVEP3       | C | 1954 | D | 2.13E-05 | 0.59(0.47,0.75) | 3.87E-03 | 0.65(0.49,0.87) | 8.29E-03 | 0.61(0.42,0.88) | 3.74E-02 | 0.44(0.2,0.95)  |
| rs6892303  | 5  | 11211453  | CTNND2       | C | 1794 | R | 2.23E-05 | 0.54(0.41,0.7)  | 8.38E-03 | 0.63(0.45,0.88) | 2.56E-04 | 0.43(0.28,0.68) |          |                 |

|            |    |           |          |   |      |   |          |                 |          |                 |          |                 |          |                 |
|------------|----|-----------|----------|---|------|---|----------|-----------------|----------|-----------------|----------|-----------------|----------|-----------------|
| rs13126363 | 4  | 172155964 |          | A | 1902 | A | 2.24E-05 | 0.72(0.61,0.84) | 2.38E-04 | 0.68(0.56,0.84) | 4.67E-02 | 0.76(0.58,0.99) | 2.27E-01 | 0.72(0.42,1.22) |
| rs2023916  | 5  | 11214237  | CTNND2   | C | 1778 | R | 2.24E-05 | 0.49(0.36,0.68) | 1.84E-03 | 0.52(0.35,0.78) | 2.44E-03 | 0.46(0.28,0.76) |          |                 |
| rs11210503 | 1  | 41873721  | HIVEP3   | A | 1985 | D | 2.26E-05 | 0.59(0.47,0.75) | 3.94E-03 | 0.65(0.49,0.87) | 8.65E-03 | 0.61(0.42,0.88) | 3.65E-02 | 0.44(0.2,0.95)  |
| rs498619   | 9  | 29622345  |          | G | 1764 | R | 2.28E-05 | 2.74(1.75,4.3)  | 7.20E-03 | 2.34(1.27,4.31) | 4.25E-04 | 3.34(1.72,6.51) |          |                 |
| rs1978156  | 5  | 11214625  | CTNND2   | T | 1778 | R | 2.33E-05 | 0.49(0.36,0.68) | 1.82E-03 | 0.52(0.35,0.78) | 2.62E-03 | 0.46(0.28,0.76) |          |                 |
| rs12358982 | 10 | 105844319 |          | G | 1834 | A | 2.38E-05 | 0.67(0.56,0.8)  | 3.27E-04 | 0.65(0.51,0.82) | 1.77E-02 | 0.7(0.52,0.94)  |          |                 |
| rs17407659 | 12 | 24129277  | SOX5     | T | 1764 | D | 2.50E-05 | 0.55(0.41,0.72) | 1.40E-03 | 0.55(0.38,0.79) | 4.16E-03 | 0.54(0.35,0.82) |          |                 |
| rs1267216  | 11 | 93973522  | PIWIL4   | A | 1964 | A | 2.55E-05 | 0.72(0.62,0.83) | 3.46E-03 | 0.75(0.62,0.91) | 1.01E-02 | 0.73(0.57,0.92) | 4.58E-02 | 0.6(0.36,0.99)  |
| rs569057   | 18 | 64224850  |          | A | 1966 | A | 2.57E-05 | 1.43(1.23,1.67) | 8.64E-03 | 1.31(1.08,1.6)  | 6.93E-03 | 1.41(1.1,1.8)   | 1.23E-02 | 1.9(1.15,3.12)  |
| rs12814129 | 12 | 124576151 | TMEM132B | C | 1740 | R | 2.64E-05 | 2.73(1.76,4.22) | 2.51E-02 | 1.91(1.1,3.32)  | 4.15E-05 | 4.37(2.16,8.81) |          |                 |
| rs1764786  | 1  | 195567119 | CRB1     | A | 1811 | R | 2.65E-05 | 2.07(1.48,2.89) | 6.02E-04 | 2.09(1.38,3.18) | 1.09E-02 | 2.04(1.19,3.52) |          |                 |
| rs13121066 | 4  | 172109073 |          | A | 1941 | A | 2.67E-05 | 0.72(0.62,0.84) | 1.97E-04 | 0.7(0.58,0.84)  | 1.55E-01 | 0.83(0.64,1.07) | 3.82E-02 | 0.61(0.38,0.97) |
| rs13128132 | 4  | 172115877 |          | A | 1941 | A | 2.67E-05 | 0.72(0.62,0.84) | 1.97E-04 | 0.7(0.58,0.84)  | 1.55E-01 | 0.83(0.64,1.07) | 3.82E-02 | 0.61(0.38,0.97) |
| rs1560560  | 4  | 172117155 |          | C | 1945 | A | 2.67E-05 | 0.72(0.62,0.84) | 1.96E-04 | 0.7(0.58,0.84)  | 1.56E-01 | 0.83(0.64,1.07) | 3.82E-02 | 0.61(0.38,0.97) |
| rs6715141  | 2  | 188331398 |          | C | 1836 | A | 2.70E-05 | 0.66(0.55,0.79) | 8.55E-03 | 0.73(0.58,0.92) | 3.49E-04 | 0.57(0.42,0.78) |          |                 |
| rs6572695  | 14 | 50302085  | NIN      | C | 1823 | A | 2.70E-05 | 1.45(1.22,1.73) | 1.26E-04 | 1.55(1.24,1.93) | 4.41E-02 | 1.34(1.01,1.78) |          |                 |
| rs1615444  | 1  | 195565938 | CRB1     | C | 1807 | R | 2.72E-05 | 2.07(1.48,2.89) | 6.28E-04 | 2.09(1.38,3.17) | 1.08E-02 | 2.05(1.19,3.52) |          |                 |
| rs580067   | 1  | 195564996 | CRB1     | T | 1804 | R | 2.77E-05 | 2.07(1.48,2.88) | 6.54E-04 | 2.08(1.37,3.16) | 1.06E-02 | 2.05(1.19,3.52) |          |                 |
| rs512195   | 18 | 64226458  |          | T | 1956 | A | 2.82E-05 | 1.43(1.23,1.67) | 9.45E-03 | 1.31(1.07,1.59) | 6.94E-03 | 1.41(1.1,1.8)   | 1.24E-02 | 1.9(1.15,3.12)  |
| rs10460550 | 2  | 53641781  |          | C | 1762 | A | 2.86E-05 | 0.64(0.52,0.78) | 7.66E-03 | 0.71(0.55,0.91) | 5.22E-04 | 0.56(0.41,0.78) |          |                 |
| rs550098   | 1  | 195564031 | CRB1     | A | 1803 | R | 2.87E-05 | 2.07(1.48,2.88) | 6.61E-04 | 2.08(1.37,3.16) | 1.08E-02 | 2.05(1.19,3.52) |          |                 |
| rs7566120  | 2  | 53649671  |          | A | 1789 | A | 2.92E-05 | 0.67(0.57,0.8)  | 7.46E-03 | 0.73(0.58,0.91) | 5.37E-04 | 0.61(0.47,0.81) |          |                 |
| rs2349872  | 2  | 188308550 |          | G | 1848 | D | 3.06E-05 | 0.62(0.51,0.77) | 5.45E-03 | 0.68(0.52,0.89) | 8.58E-04 | 0.56(0.4,0.79)  |          |                 |
| rs10137294 | 14 | 50331422  | NIN      | C | 1760 | A | 3.08E-05 | 1.59(1.28,1.97) | 3.17E-04 | 1.67(1.27,2.21) | 2.26E-02 | 1.49(1.06,2.09) |          |                 |
| rs6748449  | 2  | 188328927 |          | T | 1838 | A | 3.13E-05 | 0.66(0.55,0.79) | 8.75E-03 | 0.73(0.58,0.92) | 4.15E-04 | 0.58(0.43,0.78) |          |                 |
| rs718349   | 2  | 53644591  |          | T | 1752 | A | 3.33E-05 | 0.67(0.56,0.8)  | 9.42E-03 | 0.73(0.58,0.92) | 4.09E-04 | 0.6(0.45,0.79)  |          |                 |
| rs13032640 | 2  | 188326395 |          | G | 1843 | D | 3.33E-05 | 0.63(0.51,0.77) | 6.01E-03 | 0.68(0.52,0.89) | 8.34E-04 | 0.56(0.4,0.78)  |          |                 |
| rs2567959  | 4  | 172122862 |          | A | 1987 | A | 3.40E-05 | 0.74(0.64,0.85) | 1.11E-04 | 0.69(0.58,0.83) | 2.05E-01 | 0.85(0.66,1.08) | 6.11E-02 | 0.64(0.4,1.02)  |
| rs970431   | 4  | 172118367 |          | C | 1987 | A | 3.40E-05 | 0.74(0.64,0.85) | 1.11E-04 | 0.69(0.58,0.83) | 2.05E-01 | 0.85(0.66,1.08) | 6.11E-02 | 0.64(0.4,1.02)  |
| rs2567965  | 4  | 172119896 |          | T | 1987 | A | 3.42E-05 | 0.74(0.64,0.85) | 1.11E-04 | 0.69(0.58,0.83) | 2.06E-01 | 0.85(0.66,1.08) | 6.11E-02 | 0.64(0.4,1.02)  |
| rs970432   | 4  | 172118096 |          | C | 1987 | A | 3.42E-05 | 0.74(0.64,0.85) | 1.11E-04 | 0.69(0.58,0.83) | 2.06E-01 | 0.85(0.66,1.08) | 6.11E-02 | 0.64(0.4,1.02)  |
| rs970430   | 4  | 172118447 |          | C | 1987 | A | 3.42E-05 | 0.74(0.64,0.85) | 1.11E-04 | 0.69(0.58,0.83) | 2.06E-01 | 0.85(0.66,1.08) | 6.11E-02 | 0.64(0.4,1.02)  |
| rs2719791  | 20 | 8215739   | PLCB1    | T | 1819 | R | 3.43E-05 | 2.35(1.61,3.43) | 1.06E-02 | 1.84(1.16,2.91) | 3.34E-04 | 3.23(1.71,6.11) |          |                 |
| rs4667192  | 2  | 188325223 |          | T | 1843 | D | 3.43E-05 | 0.63(0.51,0.77) | 6.12E-03 | 0.68(0.52,0.89) | 8.45E-04 | 0.56(0.4,0.78)  |          |                 |
| rs2860282  | 8  | 70772643  | SLCO5A1  | C | 1850 | D | 3.45E-05 | 1.98(1.45,2.71) | 1.44E-03 | 1.93(1.29,2.88) | 5.73E-03 | 2.05(1.24,3.4)  |          |                 |
| rs2933054  | 8  | 70779354  | SLCO5A1  | G | 1850 | D | 3.45E-05 | 1.98(1.45,2.71) | 1.44E-03 | 1.93(1.29,2.87) | 5.74E-03 | 2.05(1.24,3.4)  |          |                 |

|            |    |           |         |   |      |   |          |                 |          |                 |          |                 |          |                 |
|------------|----|-----------|---------|---|------|---|----------|-----------------|----------|-----------------|----------|-----------------|----------|-----------------|
| rs2959579  | 8  | 70779187  | SLCO5A1 | A | 1850 | D | 3.45E-05 | 1.98(1.45,2.71) | 1.44E-03 | 1.93(1.29,2.87) | 5.74E-03 | 2.05(1.24,3.4)  |          |                 |
| rs1223314  | 4  | 172116697 |         | A | 1947 | A | 3.47E-05 | 0.73(0.63,0.85) | 1.12E-04 | 0.69(0.58,0.83) | 2.18E-01 | 0.85(0.66,1.09) | 6.27E-02 | 0.64(0.4,1.02)  |
| rs1402145  | 2  | 188309956 |         | C | 1845 | A | 3.49E-05 | 0.66(0.55,0.8)  | 8.55E-03 | 0.73(0.58,0.92) | 5.00E-04 | 0.58(0.43,0.79) |          |                 |
| rs13122956 | 4  | 172109229 |         | T | 1933 | A | 3.50E-05 | 0.74(0.63,0.85) | 1.11E-04 | 0.69(0.58,0.83) | 2.18E-01 | 0.85(0.66,1.09) | 6.27E-02 | 0.64(0.4,1.02)  |
| rs6856523  | 4  | 172106310 |         | C | 1945 | A | 3.52E-05 | 0.73(0.63,0.85) | 1.13E-04 | 0.69(0.58,0.83) | 2.18E-01 | 0.85(0.66,1.09) | 6.27E-02 | 0.64(0.4,1.02)  |
| rs13250976 | 8  | 73942706  | KCNB2   | A | 1996 | D | 3.52E-05 | 1.58(1.28,1.95) | 6.30E-03 | 1.45(1.12,1.89) | 4.72E-03 | 1.64(1.17,2.29) | 9.02E-02 | 1.83(0.91,3.67) |
| rs6831331  | 4  | 172106220 |         | T | 1945 | A | 3.52E-05 | 0.73(0.63,0.85) | 1.13E-04 | 0.69(0.58,0.83) | 2.18E-01 | 0.85(0.66,1.09) | 6.27E-02 | 0.64(0.4,1.02)  |
| rs559131   | 18 | 64228794  |         | T | 1978 | A | 3.54E-05 | 1.43(1.22,1.66) | 1.02E-02 | 1.3(1.07,1.59)  | 7.98E-03 | 1.4(1.1,1.8)    | 1.23E-02 | 1.9(1.15,3.12)  |
| rs930466   | 9  | 118565661 | ASTN2   | T | 1847 | R | 3.57E-05 | 1.96(1.41,2.71) | 1.94E-05 | 2.46(1.63,3.71) | 1.81E-01 | 1.45(0.86,2.45) |          |                 |
| rs17186473 | 4  | 172126040 |         | T | 1988 | A | 3.60E-05 | 0.74(0.64,0.85) | 1.11E-04 | 0.69(0.58,0.83) | 2.13E-01 | 0.85(0.67,1.09) | 6.12E-02 | 0.64(0.4,1.02)  |
| rs1402144  | 2  | 188315648 |         | A | 1849 | D | 3.64E-05 | 0.63(0.51,0.77) | 6.33E-03 | 0.69(0.52,0.89) | 8.58E-04 | 0.56(0.4,0.79)  |          |                 |
| rs11591291 | 10 | 105819482 | COL17A1 | A | 1824 | A | 3.71E-05 | 0.68(0.56,0.81) | 4.76E-04 | 0.66(0.52,0.83) | 1.94E-02 | 0.7(0.53,0.94)  |          |                 |
| rs1546445  | 4  | 172158105 |         | A | 1968 | A | 3.74E-05 | 0.73(0.63,0.85) | 1.55E-04 | 0.7(0.58,0.84)  | 1.97E-01 | 0.85(0.66,1.08) | 4.94E-02 | 0.62(0.39,1)    |
| rs10759854 | 9  | 118562266 | ASTN2   | C | 1836 | R | 3.76E-05 | 1.95(1.41,2.69) | 1.93E-05 | 2.45(1.63,3.69) | 1.91E-01 | 1.44(0.85,2.43) |          |                 |
| rs2274107  | 10 | 105828693 | COL17A1 | A | 1835 | A | 3.77E-05 | 0.68(0.56,0.81) | 5.32E-04 | 0.66(0.52,0.83) | 1.78E-02 | 0.7(0.52,0.94)  |          |                 |
| rs2056117  | 4  | 12619190  |         | T | 1892 | A | 3.79E-05 | 0.74(0.63,0.86) | 3.55E-05 | 0.66(0.54,0.8)  | 2.07E-01 | 0.84(0.64,1.09) | 3.24E-01 | 0.79(0.49,1.26) |
| rs13145748 | 4  | 179340295 |         | A | 1948 | D | 3.84E-05 | 0.63(0.5,0.78)  | 6.74E-04 | 0.61(0.46,0.81) | 4.65E-02 | 0.68(0.47,0.99) | 1.27E-01 | 0.57(0.28,1.16) |
| rs1520477  | 2  | 188319285 |         | C | 1846 | A | 3.94E-05 | 0.66(0.55,0.8)  | 9.52E-03 | 0.73(0.58,0.92) | 4.93E-04 | 0.58(0.43,0.79) |          |                 |
| rs8097533  | 18 | 64215820  |         | G | 1981 | A | 3.94E-05 | 1.42(1.22,1.65) | 1.22E-02 | 1.29(1.06,1.57) | 7.25E-03 | 1.4(1.1,1.78)   | 1.23E-02 | 1.9(1.15,3.13)  |
| rs9288147  | 2  | 188317982 |         | G | 1836 | D | 4.00E-05 | 0.62(0.5,0.77)  | 1.14E-02 | 0.7(0.53,0.92)  | 3.78E-04 | 0.53(0.38,0.75) |          |                 |
| rs1368005  | 4  | 172102070 |         | T | 1879 | A | 4.10E-05 | 0.73(0.62,0.85) | 3.56E-04 | 0.69(0.57,0.85) | 5.24E-02 | 0.76(0.58,1)    | 2.74E-01 | 0.74(0.44,1.25) |
| rs1508508  | 4  | 172172919 |         | C | 1971 | A | 4.18E-05 | 0.74(0.64,0.85) | 1.71E-04 | 0.7(0.58,0.84)  | 1.91E-01 | 0.84(0.66,1.08) | 5.73E-02 | 0.63(0.4,1.01)  |
| rs2219449  | 4  | 179341091 |         | G | 1952 | D | 4.30E-05 | 0.63(0.5,0.79)  | 5.87E-04 | 0.6(0.46,0.8)   | 5.76E-02 | 0.69(0.48,1)    | 1.28E-01 | 0.58(0.28,1.16) |
| rs7241738  | 18 | 64236778  |         | T | 1978 | A | 4.35E-05 | 1.42(1.22,1.66) | 1.21E-02 | 1.3(1.06,1.58)  | 8.01E-03 | 1.4(1.1,1.8)    | 1.23E-02 | 1.9(1.15,3.12)  |
| rs13110811 | 4  | 172220343 |         | T | 1773 | A | 4.35E-05 | 0.71(0.61,0.84) | 3.26E-04 | 0.69(0.57,0.84) | 3.15E-02 | 0.74(0.56,0.97) |          |                 |
| rs2933060  | 8  | 70770795  | SLCO5A1 | A | 1849 | D | 4.40E-05 | 1.97(1.44,2.7)  | 1.82E-03 | 1.91(1.28,2.85) | 5.74E-03 | 2.05(1.24,3.39) |          |                 |
| rs10969287 | 9  | 29604435  |         | G | 1851 | R | 4.44E-05 | 3.12(1.86,5.25) | 1.18E-02 | 2.46(1.24,4.88) | 4.09E-04 | 4.26(1.92,9.48) |          |                 |
| rs10885193 | 10 | 113219570 |         | T | 1939 | A | 4.45E-05 | 1.36(1.17,1.59) | 3.64E-04 | 1.42(1.17,1.72) | 8.60E-02 | 1.25(0.97,1.59) | 1.17E-01 | 1.48(0.91,2.42) |
| rs17485232 | 12 | 24106293  | SOX5    | C | 1974 | D | 4.47E-05 | 0.6(0.47,0.78)  | 1.88E-03 | 0.57(0.41,0.81) | 3.44E-03 | 0.53(0.35,0.81) | 8.33E-01 | 0.91(0.42,1.98) |
| rs4963565  | 12 | 24105525  | SOX5    | G | 1975 | D | 4.51E-05 | 0.6(0.47,0.78)  | 1.87E-03 | 0.57(0.4,0.81)  | 3.50E-03 | 0.53(0.35,0.81) | 8.32E-01 | 0.91(0.42,1.98) |
| rs12810574 | 12 | 24105932  | SOX5    | T | 1975 | D | 4.52E-05 | 0.6(0.47,0.78)  | 1.88E-03 | 0.57(0.41,0.81) | 3.49E-03 | 0.53(0.35,0.81) | 8.30E-01 | 0.91(0.42,1.98) |
| rs4963564  | 12 | 24105317  | SOX5    | T | 1975 | D | 4.56E-05 | 0.6(0.47,0.78)  | 1.88E-03 | 0.57(0.41,0.81) | 3.49E-03 | 0.53(0.35,0.81) | 8.38E-01 | 0.91(0.42,1.98) |
| rs1878241  | 10 | 113217538 |         | T | 1899 | A | 4.59E-05 | 1.38(1.18,1.61) | 4.70E-04 | 1.42(1.17,1.72) | 9.82E-02 | 1.24(0.97,1.59) | 6.38E-02 | 1.6(0.98,2.62)  |
| rs1764623  | 1  | 195554931 | CRB1    | G | 1851 | R | 4.64E-05 | 1.99(1.44,2.74) | 1.51E-03 | 1.96(1.3,2.95)  | 7.58E-03 | 2.03(1.21,3.39) |          |                 |
| rs10759855 | 9  | 118568299 | ASTN2   | A | 1846 | R | 4.64E-05 | 1.94(1.4,2.68)  | 2.06E-05 | 2.46(1.63,3.72) | 2.08E-01 | 1.42(0.84,2.39) |          |                 |
| rs1878244  | 10 | 113216808 |         | G | 1902 | A | 4.66E-05 | 1.38(1.18,1.6)  | 4.69E-04 | 1.42(1.17,1.72) | 9.97E-02 | 1.24(0.97,1.59) | 6.33E-02 | 1.6(0.98,2.62)  |

|            |    |           |          |   |      |   |          |                 |          |                 |          |                 |          |                 |
|------------|----|-----------|----------|---|------|---|----------|-----------------|----------|-----------------|----------|-----------------|----------|-----------------|
| rs13264816 | 8  | 73940417  | KCNB2    | T | 1971 | D | 4.68E-05 | 1.57(1.27,1.94) | 5.57E-03 | 1.46(1.12,1.91) | 7.46E-03 | 1.61(1.14,2.27) | 9.54E-02 | 1.82(0.91,3.65) |
| rs7816119  | 8  | 73942565  | KCNB2    | G | 1968 | D | 4.69E-05 | 1.57(1.27,1.94) | 8.19E-03 | 1.45(1.11,1.89) | 4.77E-03 | 1.63(1.17,2.29) | 9.15E-02 | 1.83(0.91,3.67) |
| rs11058222 | 12 | 124574307 | TMEM132B | G | 1784 | R | 4.76E-05 | 2.52(1.65,3.83) | 2.85E-02 | 1.88(1.08,3.27) | 9.70E-05 | 3.64(1.91,6.94) |          |                 |
| rs943374   | 1  | 41828781  | HIVEP3   | A | 1973 | A | 4.78E-05 | 0.73(0.63,0.85) | 3.22E-04 | 0.7(0.58,0.85)  | 1.52E-01 | 0.83(0.65,1.06) | 4.42E-02 | 0.59(0.36,0.98) |
| rs11675507 | 2  | 188303243 |          | A | 1836 | D | 4.81E-05 | 0.63(0.51,0.78) | 7.64E-03 | 0.69(0.53,0.9)  | 9.35E-04 | 0.56(0.4,0.79)  |          |                 |
| rs482526   | 1  | 195535386 | CRB1     | A | 1852 | R | 5.07E-05 | 1.98(1.44,2.73) | 1.65E-03 | 1.95(1.29,2.93) | 7.58E-03 | 2.03(1.21,3.39) |          |                 |
| rs664767   | 1  | 195546918 | CRB1     | A | 1852 | R | 5.07E-05 | 1.98(1.44,2.73) | 1.65E-03 | 1.95(1.29,2.93) | 7.58E-03 | 2.03(1.21,3.39) |          |                 |
| rs17324385 | 8  | 131888626 | ADCY8    | C | 1823 | A | 5.15E-05 | 0.7(0.59,0.82)  | 2.03E-03 | 0.71(0.57,0.88) | 6.09E-03 | 0.68(0.51,0.89) |          |                 |
| rs7966098  | 12 | 94962773  |          | G | 1966 | A | 5.25E-05 | 1.33(1.15,1.54) | 3.61E-04 | 1.41(1.17,1.7)  | 4.43E-02 | 1.28(1.01,1.63) | 4.35E-01 | 1.22(0.75,1.98) |
| rs6137286  | 20 | 21127752  | PLK1S1   | T | 1987 | A | 5.36E-05 | 0.7(0.61,0.82)  | 4.43E-03 | 0.75(0.62,0.91) | 6.93E-02 | 0.79(0.62,1.01) | 1.51E-03 | 0.45(0.28,0.74) |
| rs7080157  | 10 | 6552566   | PRKCQ    | A | 1779 | D | 5.56E-05 | 1.61(1.28,2.01) | 1.57E-03 | 1.58(1.2,2.1)   | 8.79E-03 | 1.64(1.14,2.36) |          |                 |
| rs930465   | 9  | 118565286 | ASTN2    | T | 1846 | R | 5.61E-05 | 1.92(1.39,2.65) | 2.63E-05 | 2.42(1.61,3.64) | 2.08E-01 | 1.42(0.84,2.39) |          |                 |
| rs1010444  | 18 | 64208012  |          | C | 2000 | A | 5.70E-05 | 1.41(1.21,1.64) | 1.72E-02 | 1.28(1.05,1.56) | 6.80E-03 | 1.4(1.1,1.78)   | 1.22E-02 | 1.9(1.15,3.12)  |
| rs17202895 | 6  | 1388800   |          | C | 1888 | D | 5.71E-05 | 1.57(1.27,1.93) | 3.99E-03 | 1.49(1.14,1.96) | 2.19E-02 | 1.49(1.06,2.09) | 4.67E-02 | 1.97(1.01,3.82) |
| rs10132785 | 14 | 50291422  | NIN      | C | 1805 | A | 5.73E-05 | 1.53(1.24,1.9)  | 4.37E-05 | 1.76(1.35,2.3)  | 1.60E-01 | 1.28(0.92,1.8)  |          |                 |
| rs1415214  | 1  | 195549808 | CRB1     | C | 1832 | R | 5.92E-05 | 1.97(1.43,2.72) | 1.25E-03 | 1.99(1.32,3)    | 1.21E-02 | 1.95(1.17,3.27) |          |                 |
| rs2835358  | 21 | 36739523  |          | A | 1788 | D | 5.98E-05 | 0.63(0.51,0.78) | 3.56E-03 | 0.65(0.49,0.87) | 3.74E-03 | 0.6(0.42,0.84)  |          |                 |
| rs1502251  | 4  | 27135045  |          | G | 1819 | R | 6.10E-05 | 2.81(1.68,4.68) | 5.85E-05 | 3.82(2,7.3)     | 1.46E-01 | 1.87(0.82,4.28) |          |                 |
| rs10762795 | 10 | 80075943  |          | A | 1956 | D | 6.15E-05 | 0.58(0.45,0.75) | 4.67E-02 | 0.7(0.49,0.98)  | 1.12E-04 | 0.43(0.28,0.66) | 3.29E-01 | 0.66(0.3,1.49)  |
| rs10472030 | 5  | 57347315  |          | T | 1761 | R | 6.24E-05 | 2.17(1.5,3.14)  | 1.51E-03 | 2.15(1.35,3.43) | 1.05E-02 | 2.2(1.21,4)     |          |                 |
| rs1815826  | 11 | 93946933  | PIWIL4   | T | 1940 | A | 6.27E-05 | 0.73(0.63,0.85) | 5.15E-03 | 0.76(0.63,0.92) | 1.02E-02 | 0.72(0.57,0.92) | 1.13E-01 | 0.66(0.4,1.1)   |
| rs1476801  | 18 | 64212708  |          | T | 1984 | A | 6.29E-05 | 1.41(1.21,1.64) | 1.74E-02 | 1.28(1.05,1.55) | 7.58E-03 | 1.4(1.1,1.78)   | 1.23E-02 | 1.9(1.15,3.13)  |
| rs441577   | 6  | 90648944  |          | C | 1819 | D | 6.32E-05 | 0.53(0.41,0.7)  | 3.97E-02 | 0.69(0.49,0.97) | 4.35E-03 | 0.51(0.32,0.81) | 3.20E-03 | 0.29(0.12,0.66) |
| rs7971150  | 12 | 94958877  |          | A | 1989 | A | 6.46E-05 | 1.36(1.18,1.58) | 2.45E-03 | 1.34(1.11,1.62) | 3.85E-02 | 1.29(1.02,1.64) | 4.76E-02 | 1.6(1.01,2.55)  |
| rs2913774  | 5  | 177672235 | COL23A1  | C | 1789 | A | 6.48E-05 | 1.52(1.25,1.85) | 7.55E-03 | 1.42(1.1,1.84)  | 1.48E-03 | 1.66(1.22,2.25) |          |                 |
| rs8095325  | 18 | 64211971  |          | C | 1994 | A | 6.49E-05 | 1.41(1.21,1.64) | 1.79E-02 | 1.28(1.05,1.55) | 7.54E-03 | 1.4(1.1,1.78)   | 1.23E-02 | 1.9(1.15,3.13)  |
| rs16879459 | 4  | 27137622  |          | G | 1821 | R | 6.60E-05 | 2.8(1.68,4.67)  | 6.15E-05 | 3.81(1.99,7.29) | 1.48E-01 | 1.87(0.82,4.25) |          |                 |
| rs9974322  | 21 | 36740175  |          | G | 1820 | D | 6.61E-05 | 0.63(0.51,0.79) | 3.56E-03 | 0.66(0.5,0.87)  | 4.12E-03 | 0.6(0.42,0.85)  |          |                 |
| rs9971100  | 10 | 105816409 | COL17A1  | C | 1823 | A | 6.63E-05 | 0.68(0.57,0.82) | 8.44E-04 | 0.67(0.53,0.84) | 2.03E-02 | 0.71(0.53,0.94) |          |                 |
| rs7519983  | 1  | 41855956  | HIVEP3   | G | 1957 | D | 6.75E-05 | 0.61(0.48,0.77) | 5.25E-03 | 0.64(0.47,0.87) | 9.93E-03 | 0.6(0.41,0.88)  | 1.28E-01 | 0.53(0.24,1.19) |
| rs6817733  | 4  | 172177077 |          | T | 1895 | A | 6.75E-05 | 0.73(0.62,0.85) | 3.75E-04 | 0.69(0.57,0.85) | 1.11E-01 | 0.8(0.61,1.05)  | 1.47E-01 | 0.68(0.4,1.14)  |
| rs6137292  | 20 | 21143803  | PLK1S1   | A | 1970 | A | 6.78E-05 | 0.7(0.6,0.82)   | 6.45E-03 | 0.76(0.63,0.92) | 6.93E-02 | 0.79(0.62,1.01) | 8.97E-04 | 0.43(0.26,0.71) |
| rs1338657  | 6  | 102956029 |          | T | 1818 | R | 6.82E-05 | 0.56(0.42,0.73) | 7.84E-03 | 0.62(0.44,0.88) | 1.48E-03 | 0.49(0.32,0.76) |          |                 |
| rs9953072  | 18 | 64211988  |          | C | 1995 | A | 6.85E-05 | 1.41(1.21,1.64) | 1.86E-02 | 1.27(1.05,1.55) | 7.54E-03 | 1.4(1.1,1.78)   | 1.23E-02 | 1.9(1.15,3.13)  |
| rs10890151 | 1  | 41874430  | HIVEP3   | C | 1882 | D | 6.92E-05 | 0.6(0.47,0.76)  | 6.80E-03 | 0.66(0.49,0.89) | 1.50E-02 | 0.62(0.42,0.91) | 4.00E-02 | 0.43(0.19,0.96) |
| rs1022337  | 2  | 183615031 |          | T | 1786 | A | 6.94E-05 | 1.45(1.2,1.74)  | 7.03E-05 | 1.61(1.28,2.04) | 1.40E-01 | 1.26(0.94,1.69) |          |                 |

|            |    |           |                               |   |      |   |          |                 |          |                 |          |                 |          |                 |
|------------|----|-----------|-------------------------------|---|------|---|----------|-----------------|----------|-----------------|----------|-----------------|----------|-----------------|
| rs1993402  | 4  | 27139792  |                               | C | 1819 | R | 7.00E-05 | 2.79(1.67,4.65) | 6.80E-05 | 3.79(1.98,7.26) | 1.46E-01 | 1.87(0.82,4.25) |          |                 |
| rs2933069  | 8  | 70765480  | SLCO5A1                       | C | 1842 | D | 7.04E-05 | 1.96(1.42,2.69) | 2.89E-03 | 1.88(1.25,2.83) | 5.72E-03 | 2.06(1.24,3.42) |          |                 |
| rs2933068  | 8  | 70765498  | SLCO5A1                       | G | 1842 | D | 7.07E-05 | 1.95(1.42,2.69) | 2.90E-03 | 1.88(1.25,2.83) | 5.72E-03 | 2.06(1.24,3.42) |          |                 |
| rs10939164 | 4  | 27142444  |                               | G | 1819 | R | 7.23E-05 | 2.78(1.67,4.64) | 7.09E-05 | 3.78(1.97,7.25) | 1.46E-01 | 1.87(0.82,4.23) |          |                 |
| rs10985423 | 9  | 123663014 | TTLL11,MIR548D<br>1,MIR548AA1 | A | 1795 | R | 7.23E-05 | 0.47(0.33,0.68) | 1.08E-03 | 0.45(0.28,0.72) | 1.72E-02 | 0.5(0.29,0.88)  |          |                 |
| rs11210501 | 1  | 41864221  | HIVEP3                        | T | 1964 | A | 7.28E-05 | 0.74(0.64,0.86) | 1.06E-03 | 0.73(0.61,0.88) | 6.40E-02 | 0.8(0.63,1.01)  | 9.37E-02 | 0.65(0.39,1.07) |
| rs944981   | 9  | 118909914 | ASTN2                         | G | 1922 | D | 7.34E-05 | 0.59(0.46,0.77) | 1.17E-03 | 0.58(0.41,0.8)  | 4.19E-02 | 0.63(0.41,0.98) | 1.82E-01 | 0.56(0.25,1.3)  |
| rs10513066 | 5  | 11129061  | CTNND2                        | C | 1837 | A | 7.40E-05 | 0.71(0.6,0.84)  | 3.53E-03 | 0.73(0.6,0.9)   | 4.77E-03 | 0.68(0.53,0.89) |          |                 |
| rs809220   | 20 | 21362037  |                               | C | 1973 | D | 7.41E-05 | 0.63(0.51,0.77) | 1.68E-02 | 0.72(0.55,0.94) | 7.94E-03 | 0.62(0.44,0.88) | 1.53E-02 | 0.43(0.22,0.85) |
| rs2380563  | 8  | 70767626  | SLCO5A1                       | T | 1845 | D | 7.43E-05 | 1.95(1.42,2.67) | 3.03E-03 | 1.87(1.24,2.81) | 5.77E-03 | 2.05(1.24,3.39) |          |                 |
| rs2887104  | 12 | 94959574  |                               | A | 1977 | A | 7.57E-05 | 1.36(1.18,1.57) | 2.92E-03 | 1.34(1.11,1.62) | 3.77E-02 | 1.29(1.02,1.64) | 4.82E-02 | 1.6(1.01,2.54)  |
| rs11210498 | 1  | 41850545  | HIVEP3                        | T | 1961 | D | 7.58E-05 | 0.61(0.48,0.77) | 5.87E-03 | 0.65(0.48,0.88) | 9.93E-03 | 0.6(0.41,0.88)  | 1.27E-01 | 0.53(0.24,1.19) |
| rs3895387  | 9  | 139693629 | EHMT1                         | T | 1941 | D | 7.65E-05 | 0.64(0.51,0.81) | 9.76E-04 | 0.6(0.44,0.81)  | 2.67E-02 | 0.65(0.44,0.95) | 4.51E-01 | 0.75(0.37,1.54) |
| rs11624766 | 14 | 50284680  | NIN                           | C | 1817 | A | 7.68E-05 | 1.5(1.22,1.85)  | 2.04E-05 | 1.78(1.37,2.31) | 2.87E-01 | 1.21(0.87,1.69) |          |                 |
| rs4692059  | 4  | 25681849  |                               | T | 1936 | A | 7.79E-05 | 0.72(0.63,0.84) | 2.02E-02 | 0.79(0.66,0.96) | 5.43E-03 | 0.71(0.55,0.9)  | 2.20E-02 | 0.59(0.38,0.92) |
| rs2205960  | 1  | 171458098 |                               | T | 1770 | R | 7.82E-05 | 2.41(1.59,3.64) | 1.17E-02 | 1.98(1.18,3.32) | 1.02E-03 | 3.08(1.58,5.99) |          |                 |
| rs1984207  | 1  | 237792870 |                               | G | 1971 | D | 7.85E-05 | 0.66(0.52,0.83) | 2.12E-05 | 0.54(0.41,0.72) | 4.05E-01 | 0.84(0.58,1.22) | 3.18E-01 | 0.67(0.31,1.45) |
| rs12406060 | 1  | 237787081 |                               | C | 1979 | D | 7.87E-05 | 0.66(0.53,0.83) | 2.00E-05 | 0.54(0.41,0.72) | 4.08E-01 | 0.85(0.59,1.22) | 3.24E-01 | 0.67(0.31,1.45) |
| rs292263   | 6  | 90606211  | CASP8AP2                      | C | 1954 | D | 7.89E-05 | 0.55(0.42,0.71) | 3.39E-02 | 0.68(0.48,0.96) | 4.04E-03 | 0.51(0.33,0.8)  | 9.36E-03 | 0.34(0.15,0.76) |
| rs2933061  | 8  | 70769644  | SLCO5A1                       | A | 1848 | D | 7.91E-05 | 1.94(1.41,2.66) | 3.21E-03 | 1.86(1.24,2.79) | 5.74E-03 | 2.05(1.24,3.39) |          |                 |
| rs1018967  | 5  | 11159572  | CTNND2                        | A | 1764 | A | 7.91E-05 | 0.71(0.6,0.84)  | 3.46E-03 | 0.73(0.59,0.9)  | 5.29E-03 | 0.68(0.52,0.89) |          |                 |
| rs4836869  | 9  | 123679741 | TTLL11,MIR548A<br>A1,MIR548D1 | G | 1841 | R | 7.99E-05 | 0.47(0.33,0.68) | 1.19E-03 | 0.45(0.28,0.73) | 1.73E-02 | 0.5(0.29,0.88)  |          |                 |
| rs10121618 | 9  | 123679608 | TTLL11,MIR548D<br>1,MIR548AA1 | C | 1841 | R | 8.01E-05 | 0.47(0.33,0.68) | 1.21E-03 | 0.45(0.28,0.73) | 1.73E-02 | 0.5(0.29,0.88)  |          |                 |
| rs7316268  | 12 | 31358297  | FAM60A                        | C | 1760 | A | 8.06E-05 | 1.5(1.23,1.82)  | 1.23E-03 | 1.51(1.18,1.93) | 1.70E-02 | 1.48(1.08,2.04) |          |                 |
| rs3748438  | 20 | 21144089  | PLK1S1                        | G | 1972 | A | 8.09E-05 | 0.71(0.61,0.82) | 6.57E-03 | 0.76(0.63,0.92) | 6.95E-02 | 0.79(0.62,1.01) | 1.50E-03 | 0.45(0.28,0.74) |
| rs12591953 | 15 | 69787332  | THSD4                         | A | 1756 | R | 8.16E-05 | 1.85(1.38,2.49) | 1.16E-02 | 1.68(1.13,2.5)  | 1.10E-03 | 2.09(1.35,3.24) |          |                 |
| rs7485624  | 12 | 20508680  | PDE3A                         | G | 1833 | D | 8.18E-05 | 0.63(0.51,0.79) | 9.12E-03 | 0.69(0.52,0.91) | 1.47E-03 | 0.57(0.4,0.8)   |          |                 |
| rs6819553  | 4  | 172177986 |                               | T | 1900 | A | 8.30E-05 | 0.73(0.62,0.86) | 3.46E-04 | 0.69(0.57,0.85) | 1.13E-01 | 0.8(0.61,1.05)  | 2.10E-01 | 0.71(0.42,1.2)  |
| rs1863005  | 7  | 134704002 | CNOT4                         | A | 1994 | D | 8.31E-05 | 1.66(1.31,2.11) | 2.34E-03 | 1.63(1.2,2.22)  | 6.35E-02 | 1.44(0.99,2.11) | 2.97E-02 | 2.37(1.09,5.12) |
| rs1321919  | 9  | 118287396 | ASTN2                         | A | 1922 | D | 8.43E-05 | 0.61(0.47,0.78) | 9.96E-04 | 0.59(0.43,0.8)  | 7.79E-02 | 0.7(0.47,1.03)  | 1.03E-01 | 0.5(0.22,1.14)  |
| rs7863807  | 9  | 123665707 | TTLL11,MIR548A<br>A1,MIR548D1 | G | 1833 | R | 8.47E-05 | 0.48(0.33,0.68) | 1.26E-03 | 0.46(0.28,0.73) | 1.75E-02 | 0.5(0.29,0.88)  |          |                 |
| rs13077992 | 3  | 68669012  | FAM19A1                       | A | 1848 | D | 8.50E-05 | 1.54(1.25,1.9)  | 3.22E-03 | 1.5(1.15,1.96)  | 6.26E-03 | 1.6(1.15,2.23)  |          |                 |

|            |    |           |                              |   |      |   |          |                 |          |                 |          |                 |          |                 |
|------------|----|-----------|------------------------------|---|------|---|----------|-----------------|----------|-----------------|----------|-----------------|----------|-----------------|
| rs10912694 | 1  | 169502847 | FMO1                         | G | 1761 | D | 8.60E-05 | 0.65(0.53,0.8)  | 9.56E-04 | 0.64(0.49,0.83) | 2.37E-02 | 0.67(0.48,0.94) |          |                 |
| rs13253030 | 8  | 73976133  | KCNB2                        | T | 1848 | D | 8.70E-05 | 1.56(1.26,1.93) | 6.01E-03 | 1.46(1.12,1.91) | 2.86E-03 | 1.69(1.2,2.38)  |          |                 |
| rs2526401  | 7  | 25054861  |                              | C | 1808 | A | 8.74E-05 | 0.73(0.63,0.85) | 8.13E-04 | 0.72(0.59,0.87) | 2.77E-02 | 0.76(0.6,0.97)  |          |                 |
| rs6047404  | 20 | 21300236  | XRN2                         | A | 2000 | A | 8.77E-05 | 0.69(0.59,0.81) | 9.38E-03 | 0.76(0.62,0.93) | 5.81E-02 | 0.78(0.6,1)     | 1.04E-03 | 0.42(0.25,0.71) |
| rs4815041  | 20 | 21301409  | XRN2                         | A | 2000 | A | 8.79E-05 | 0.69(0.59,0.81) | 9.38E-03 | 0.76(0.62,0.93) | 5.81E-02 | 0.78(0.6,1)     | 1.04E-03 | 0.42(0.25,0.71) |
| rs17363834 | 1  | 41849194  | HIVEP3                       | C | 1960 | D | 8.81E-05 | 0.61(0.48,0.78) | 6.76E-03 | 0.65(0.48,0.88) | 9.96E-03 | 0.6(0.41,0.88)  | 1.26E-01 | 0.53(0.24,1.19) |
| rs2526404  | 7  | 25056222  |                              | G | 1810 | A | 8.82E-05 | 0.74(0.63,0.86) | 8.24E-04 | 0.72(0.59,0.87) | 2.76E-02 | 0.76(0.6,0.97)  |          |                 |
| rs4497932  | 20 | 21290378  | XRN2                         | T | 2000 | A | 8.84E-05 | 0.69(0.59,0.81) | 9.43E-03 | 0.76(0.62,0.93) | 5.81E-02 | 0.78(0.6,1)     | 1.04E-03 | 0.42(0.25,0.71) |
| rs6047407  | 20 | 21303846  | XRN2                         | A | 1999 | A | 8.87E-05 | 0.69(0.59,0.81) | 9.49E-03 | 0.76(0.62,0.93) | 5.80E-02 | 0.78(0.6,1)     | 1.05E-03 | 0.42(0.25,0.71) |
| rs3812274  | 7  | 134711869 | CNOT4                        | C | 1994 | D | 8.98E-05 | 1.65(1.3,2.09)  | 2.47E-03 | 1.62(1.19,2.21) | 6.34E-02 | 1.44(0.99,2.1)  | 3.13E-02 | 2.32(1.08,4.98) |
| rs6892747  | 5  | 177648059 | COL23A1                      | T | 1820 | D | 8.98E-05 | 1.59(1.27,1.99) | 1.93E-03 | 1.58(1.19,2.1)  | 1.20E-02 | 1.6(1.11,2.31)  |          |                 |
| rs9322644  | 6  | 102855022 |                              | C | 1814 | R | 9.23E-05 | 0.57(0.43,0.74) | 5.54E-03 | 0.61(0.43,0.86) | 3.52E-03 | 0.52(0.33,0.8)  |          |                 |
| rs6047414  | 20 | 21308528  | XRN2                         | A | 1999 | A | 9.23E-05 | 0.69(0.59,0.81) | 9.65E-03 | 0.76(0.62,0.93) | 5.82E-02 | 0.77(0.6,1)     | 1.10E-03 | 0.43(0.26,0.71) |
| rs13259257 | 8  | 73973407  | KCNB2                        | T | 1847 | D | 9.33E-05 | 1.56(1.26,1.93) | 6.46E-03 | 1.46(1.12,1.91) | 2.82E-03 | 1.69(1.2,2.39)  |          |                 |
| rs7839758  | 8  | 73973908  | KCNB2                        | G | 1847 | D | 9.37E-05 | 1.56(1.26,1.92) | 6.46E-03 | 1.46(1.12,1.91) | 2.83E-03 | 1.69(1.2,2.39)  |          |                 |
| rs13255723 | 8  | 73976395  | KCNB2                        | C | 1849 | D | 9.42E-05 | 1.56(1.26,1.92) | 6.46E-03 | 1.46(1.12,1.91) | 2.87E-03 | 1.69(1.2,2.38)  |          |                 |
| rs1288692  | 3  | 71487960  | FOXP1                        | T | 1748 | R | 9.50E-05 | 2.19(1.49,3.24) | 1.23E-03 | 2.24(1.38,3.62) | 2.02E-02 | 2.14(1.14,4.04) |          |                 |
| rs9320924  | 6  | 123665894 | TRDN                         | T | 1800 | A | 9.57E-05 | 0.67(0.54,0.81) | 1.09E-03 | 0.66(0.52,0.84) | 2.33E-02 | 0.67(0.48,0.94) |          |                 |
| rs1982036  | 6  | 123664286 | TRDN                         | G | 1800 | A | 9.59E-05 | 0.67(0.54,0.81) | 1.09E-03 | 0.66(0.52,0.84) | 2.33E-02 | 0.67(0.48,0.94) |          |                 |
| rs9283099  | 6  | 123669820 | TRDN                         | T | 1800 | A | 9.61E-05 | 0.67(0.54,0.81) | 1.09E-03 | 0.66(0.52,0.84) | 2.33E-02 | 0.67(0.48,0.94) |          |                 |
| rs9320926  | 6  | 123669987 | TRDN                         | C | 1801 | A | 9.62E-05 | 0.67(0.55,0.81) | 1.09E-03 | 0.66(0.52,0.84) | 2.34E-02 | 0.68(0.48,0.94) |          |                 |
| rs1982035  | 6  | 123662950 | TRDN                         | C | 1800 | A | 9.66E-05 | 0.67(0.54,0.81) | 1.10E-03 | 0.66(0.52,0.84) | 2.33E-02 | 0.67(0.48,0.94) |          |                 |
| rs7860920  | 9  | 123673643 | TTL11,MIR548A<br>A1,MIR548D1 | T | 1852 | R | 9.66E-05 | 0.48(0.34,0.69) | 1.46E-03 | 0.46(0.29,0.74) | 1.73E-02 | 0.5(0.29,0.88)  |          |                 |
| rs1555946  | 20 | 21319371  |                              | A | 1995 | A | 9.67E-05 | 0.7(0.59,0.82)  | 9.65E-03 | 0.76(0.62,0.93) | 5.72E-02 | 0.77(0.6,1)     | 1.21E-03 | 0.43(0.26,0.71) |
| rs1955926  | 14 | 49769618  |                              | A | 1948 | A | 9.71E-05 | 1.39(1.19,1.61) | 6.45E-04 | 1.4(1.16,1.7)   | 3.42E-01 | 1.14(0.89,1.46) | 3.66E-03 | 2.05(1.26,3.32) |
| rs4390017  | 9  | 123673532 | TTL11,MIR548A<br>A1,MIR548D1 | C | 1852 | R | 9.71E-05 | 0.48(0.34,0.69) | 1.47E-03 | 0.46(0.29,0.74) | 1.73E-02 | 0.5(0.29,0.88)  |          |                 |
| rs4370602  | 9  | 123672917 | TTL11,MIR548A<br>A1,MIR548D1 | G | 1852 | R | 9.74E-05 | 0.48(0.34,0.69) | 1.47E-03 | 0.46(0.29,0.74) | 1.73E-02 | 0.5(0.29,0.88)  |          |                 |
| rs10883966 | 10 | 105859905 |                              | G | 1770 | A | 9.78E-05 | 0.69(0.57,0.83) | 1.65E-03 | 0.69(0.55,0.87) | 1.55E-02 | 0.69(0.52,0.93) |          |                 |
| rs7343261  | 20 | 21246731  | XRN2                         | T | 2000 | A | 9.79E-05 | 0.7(0.59,0.82)  | 9.35E-03 | 0.76(0.62,0.93) | 6.44E-02 | 0.78(0.6,1.01)  | 1.04E-03 | 0.42(0.25,0.71) |
| rs7345973  | 20 | 21246732  | XRN2                         | G | 2000 | A | 9.79E-05 | 0.7(0.59,0.82)  | 9.35E-03 | 0.76(0.62,0.93) | 6.44E-02 | 0.78(0.6,1.01)  | 1.04E-03 | 0.42(0.25,0.71) |
| rs4384052  | 9  | 123672556 | TTL11,MIR548A<br>A1,MIR548D1 | C | 1852 | R | 9.79E-05 | 0.48(0.34,0.69) | 1.48E-03 | 0.46(0.29,0.74) | 1.73E-02 | 0.5(0.29,0.88)  |          |                 |
| rs211978   | 21 | 17848756  | CXADR                        | A | 1995 | D | 9.83E-05 | 1.51(1.22,1.86) | 2.06E-03 | 1.53(1.17,2)    | 2.91E-02 | 1.47(1.05,2.06) | 2.20E-01 | 1.54(0.78,3.02) |



|            |    |           |                              |   |      |   |          |                 |          |                 |          |                 |          |                 |
|------------|----|-----------|------------------------------|---|------|---|----------|-----------------|----------|-----------------|----------|-----------------|----------|-----------------|
| rs4837907  | 9  | 123670419 | TTL11,MIR548A<br>A1,MIR548D1 | C | 1852 | R | 9.84E-05 | 0.48(0.34,0.69) | 1.50E-03 | 0.46(0.29,0.74) | 1.73E-02 | 0.5(0.29,0.88)  |          |                 |
| rs6047377  | 20 | 21249477  | XRN2                         | C | 2000 | A | 9.86E-05 | 0.7(0.59,0.82)  | 9.35E-03 | 0.76(0.62,0.93) | 6.49E-02 | 0.78(0.6,1.01)  | 1.04E-03 | 0.42(0.25,0.71) |
| rs4240471  | 9  | 123668078 | TTL11,MIR548A<br>A1,MIR548D1 | T | 1852 | R | 9.89E-05 | 0.48(0.34,0.69) | 1.50E-03 | 0.46(0.29,0.74) | 1.73E-02 | 0.5(0.29,0.88)  |          |                 |
| rs10798304 | 1  | 169525266 |                              | T | 1847 | D | 9.93E-05 | 0.66(0.53,0.81) | 1.17E-03 | 0.64(0.49,0.84) | 2.22E-02 | 0.67(0.48,0.94) |          |                 |
| rs12516452 | 5  | 55692389  |                              | C | 1851 | A | 9.93E-05 | 1.48(1.22,1.8)  | 4.08E-04 | 1.57(1.23,2.01) | 5.62E-02 | 1.36(1,1.87)    |          |                 |
| rs9792544  | 9  | 123665526 | TTL11,MIR548A<br>A1,MIR548D1 | A | 1852 | R | 9.93E-05 | 0.48(0.34,0.69) | 1.51E-03 | 0.46(0.29,0.74) | 1.73E-02 | 0.5(0.29,0.88)  |          |                 |
| rs6047396  | 20 | 21279541  | XRN2                         | T | 1998 | A | 9.96E-05 | 0.7(0.59,0.82)  | 9.35E-03 | 0.76(0.62,0.93) | 6.56E-02 | 0.78(0.6,1.01)  | 1.04E-03 | 0.42(0.25,0.71) |
| rs7105524  | 11 | 93966090  | PIWIL4                       | G | 1974 | A | 9.98E-05 | 0.73(0.63,0.85) | 4.33E-03 | 0.75(0.62,0.91) | 2.78E-02 | 0.76(0.6,0.97)  | 7.18E-02 | 0.63(0.38,1.04) |

Supplemental Table S5. Clinical characteristics at time of biopsy of the lupus nephritis and control populations from the European Renal cDNA Cell Band (ERCB) included in the renal HG-U133A mRNA analysis.

| SLE Characteristic                                                        | Lupus Nephritis<br>N=32 | Control<br>N=15 | P-value |
|---------------------------------------------------------------------------|-------------------------|-----------------|---------|
| Gender (number of females:males)                                          | 25:7                    | 6:9             |         |
| Median age, years (min-max)                                               | 33.4 (17-72)            | 55.3 (27-70)    | <0.0001 |
| World Health Organization classification (number in class II, III, IV, V) | 8, 10, 12, 2            | N/A             |         |
| American College of Rheumatology                                          |                         |                 |         |
| Renal disorder (proteinuria), n (%)                                       | 32 (100)                | 0               |         |
| Immunologic (anti-dsDNA, antibodies), n (%)                               | 20 (90)*                | N/A             |         |
| Anti-nuclear antibody, n (%)                                              | 29 (93)*                | N/A             |         |

N/A: not applicable; \*Data were not available for some patients.

Supplemental Table S6. Significant enrichment of genes

From the whole human SNPs database (dbSNP Build 131, containing over 26 million SNPs), 10 sets of 22 random SNPs (same number of SNPs than the number of SNPs listed in the Table 4) were generated. For each SNP in each set, we look if the genes located at +/- 500kb were assessed for their regulation in Glomerular and Tubulo-interstitial compartments of LN patients vs controls (see the Table below). The LN SNPs provided in Table 4 of our manuscript show a higher percentage of significance than the transcripts in proximity to the random SNP sets, consistent with higher degree of transcriptional regulation in these loci.

| <b>List #</b>  | <b># of SNPs</b> | <b># of chr targeted</b> | <b># of genes in +/- 500 kb (ref. Fig 2)</b> | <b># of genes having an official gene ID</b> | <b>% of genes regulated in Glom_LN v LD</b> | <b>% of genes regulated in Tub_LN v LD</b> |
|----------------|------------------|--------------------------|----------------------------------------------|----------------------------------------------|---------------------------------------------|--------------------------------------------|
| <b>Table 4</b> | <b>22</b>        | <b>-</b>                 | <b>26</b>                                    | <b>26</b>                                    | <b>53.8%</b>                                | <b>76.9%</b>                               |
| <b>1</b>       | 22               | 16                       | 197                                          | 86                                           | 18.6%                                       | 32.6%                                      |
| <b>2</b>       | 22               | 12                       | 354                                          | 174                                          | 33.9%                                       | 41.4%                                      |
| <b>3</b>       | 22               | 14                       | 308                                          | 160                                          | 26.3%                                       | 34.4%                                      |
| <b>4</b>       | 22               | 14                       | 335                                          | 156                                          | 26.3%                                       | 37.2%                                      |
| <b>5</b>       | 22               | 14                       | 296                                          | 142                                          | 30.3%                                       | 38.0%                                      |
| <b>6</b>       | 22               | 12                       | 281                                          | 135                                          | 36.3%                                       | 35.6%                                      |
| <b>7</b>       | 22               | 12                       | 306                                          | 135                                          | 23.0%                                       | 27.4%                                      |
| <b>8</b>       | 22               | 14                       | 409                                          | 205                                          | 33.7%                                       | 42.0%                                      |
| <b>9</b>       | 22               | 13                       | 354                                          | 187                                          | 25.1%                                       | 33.7%                                      |
| <b>10</b>      | 22               | 13                       | 290                                          | 135                                          | 34.1%                                       | 31.1%                                      |

Supplemental Table S7. Enrichment of PDGF pathway for regulated transcripts.

The PDGF signaling pathway was significantly enriched for regulated transcripts, ranking in the software algorithm used (Ingenuity) as number 53 based on the p-value assigned by the algorithm (there were 81 pathways with a p-value<0.05). The enrichment P-value is based on the following parameters: 1) the number of genes that participate in that process, and 2) the total number of genes that are known to be associated with that process in the selected reference set (Affymetrix Human HG133A chip). From the LN regulated genes (961) used as input (corresponding to the genes with a q-value<0.05 and a fold-change  $\geq 1.5$  and  $\leq 0.7$  for the up-regulated and down-regulated genes respectively), there were 81 pathways giving a p-value<0.05. PDGFRA was ranked as pathway #53 with a p-value of 0.013 and a ratio of 0.152 (12 of 79 molecules). The pathway having the smallest p-value does not necessarily reflect the pathway with the highest number of genes regulated in this pathway. Indeed the ratios of regulated genes to genes in pathway were 0.053 and 0.556 respectively, corresponding to a p-value of 0.024 and  $3.8 \times 10^{-4}$ , respectively. Below is the list of the pathways significantly regulated in human LN glomeruli compared to controls.

| Ingenuity Canonical Pathways                                                   | p-value | Ratio | Ingenuity Canonical Pathways                                                      | p-value | Ratio |
|--------------------------------------------------------------------------------|---------|-------|-----------------------------------------------------------------------------------|---------|-------|
| 1 Cytotoxic T Lymphocyte-mediated Apoptosis of Target Cells                    | 1.0E-07 | 0.198 | 42 Macropinocytosis Signaling                                                     | 7.8E-03 | 0.158 |
| 2 Role of Pattern Recognition Receptors in Recognition of Bacteria and Viruses | 4.9E-07 | 0.230 | 43 One Carbon Pool by Folate                                                      | 8.1E-03 | 0.139 |
| 3 B Cell Development                                                           | 4.9E-06 | 0.297 | 44 Crosstalk between Dendritic Cells and Natural Killer Cells                     | 8.3E-03 | 0.144 |
| 4 Allograft Rejection Signaling                                                | 6.6E-06 | 0.143 | 45 Communication between Innate and Adaptive Immune Cells                         | 8.9E-03 | 0.110 |
| 5 Calcium-induced T Lymphocyte Apoptosis                                       | 1.1E-05 | 0.214 | 46 ILK Signaling                                                                  | 9.5E-03 | 0.119 |
| 6 CTLA4 Signaling in Cytotoxic T Lymphocytes                                   | 1.6E-05 | 0.194 | 47 Chemokine Signaling                                                            | 1.0E-02 | 0.162 |
| 7 Cdc42 Signaling                                                              | 1.9E-05 | 0.138 | 48 Toll-like Receptor Signaling                                                   | 1.1E-02 | 0.164 |
| 8 Phospholipase C Signaling                                                    | 2.0E-05 | 0.135 | 49 Role of Tissue Factor in Cancer                                                | 1.1E-02 | 0.140 |
| 9 Complement System                                                            | 2.3E-05 | 0.314 | 50 Thyroid Cancer Signaling                                                       | 1.2E-02 | 0.174 |
| 10 Antigen Presentation Pathway                                                | 3.2E-05 | 0.256 | 51 Fc Epsilon RI Signaling                                                        | 1.2E-02 | 0.135 |
| 11 Hepatic Fibrosis / Hepatic Stellate Cell Activation                         | 5.0E-05 | 0.177 | 52 VDR/RXR Activation                                                             | 1.2E-02 | 0.160 |
| 12 Nur77 Signaling in T Lymphocytes                                            | 5.1E-05 | 0.206 | 53 PDGF Signaling                                                                 | 1.3E-02 | 0.152 |
| 13 Role of NFAT in Regulation of the Immune Response                           | 6.6E-05 | 0.140 | 54 Altered T Cell and B Cell Signaling in Rheumatoid Arthritis                    | 1.4E-02 | 0.130 |
| 14 Autoimmune Thyroid Disease Signaling                                        | 8.3E-05 | 0.180 | 55 Prolactin Signaling                                                            | 1.4E-02 | 0.150 |
| 15 OX40 Signaling Pathway                                                      | 8.5E-05 | 0.144 | 56 FcγRIIB Signaling in B Lymphocytes                                             | 1.6E-02 | 0.136 |
| 16 CCR5 Signaling in Macrophages                                               | 1.3E-04 | 0.160 | 57 Polyamine Regulation in Colon Cancer                                           | 1.7E-02 | 0.172 |
| 17 Systemic Lupus Erythematosus Signaling                                      | 1.6E-04 | 0.133 | 58 Glioma Signaling                                                               | 1.8E-02 | 0.125 |
| 18 Interferon Signaling                                                        | 1.9E-04 | 0.278 | 59 p70S6K Signaling                                                               | 1.9E-02 | 0.123 |
| 19 Graft-versus-Host Disease Signaling                                         | 1.9E-04 | 0.220 | 60 Corticotropin Releasing Hormone Signaling                                      | 2.2E-02 | 0.112 |
| 20 Leukocyte Extravasation Signaling                                           | 2.2E-04 | 0.146 | 61 iCOS-iCOSL Signaling in T Helper Cells                                         | 2.2E-02 | 0.115 |
| 21 PKCθ Signaling in T Lymphocytes                                             | 2.5E-04 | 0.141 | 62 fMLP Signaling in Neutrophils                                                  | 2.2E-02 | 0.117 |
| 22 Natural Killer Cell Signaling                                               | 2.8E-04 | 0.173 | 63 NF-κB Signaling                                                                | 2.3E-02 | 0.114 |
| 23 CD28 Signaling in T Helper Cells                                            | 3.3E-04 | 0.152 | 64 Starch and Sucrose Metabolism                                                  | 2.4E-02 | 0.053 |
| 24 Dendritic Cell Maturation                                                   | 3.8E-04 | 0.128 | 65 G Beta Gamma Signaling                                                         | 2.6E-02 | 0.111 |
| 25 Pathogenesis of Multiple Sclerosis                                          | 3.8E-04 | 0.556 | 66 Renin-Angiotensin Signaling                                                    | 2.6E-02 | 0.121 |
| 26 Coagulation System                                                          | 4.2E-04 | 0.263 | 67 Activation of IRF by Cytosolic Pattern Recognition Receptors                   | 2.6E-02 | 0.139 |
| 27 Fcγ Receptor-mediated Phagocytosis in Macrophages and Monocytes             | 9.8E-04 | 0.167 | 68 B Cell Receptor Signaling                                                      | 2.8E-02 | 0.115 |
| 28 Endothelin-1 Signaling                                                      | 1.1E-03 | 0.131 | 69 IL-4 Signaling                                                                 | 3.2E-02 | 0.137 |
| 29 Intrinsic Prothrombin Activation Pathway                                    | 1.2E-03 | 0.235 | 70 Tight Junction Signaling                                                       | 3.4E-02 | 0.110 |
| 30 T Helper Cell Differentiation                                               | 1.3E-03 | 0.181 | 71 Ceramide Signaling                                                             | 3.5E-02 | 0.126 |
| 31 IL-8 Signaling                                                              | 1.8E-03 | 0.130 | 72 Aldosterone Signaling in Epithelial Cells                                      | 3.7E-02 | 0.100 |
| 32 Tumoricidal Function of Hepatic Natural Killer Cells                        | 2.7E-03 | 0.292 | 73 C21-Steroid Hormone Metabolism                                                 | 3.9E-02 | 0.059 |
| 33 Growth Hormone Signaling                                                    | 2.8E-03 | 0.173 | 74 Role of Macrophages, Fibroblasts and Endothelial Cells in Rheumatoid Arthritis | 4.2E-02 | 0.090 |
| 34 PI3K Signaling in B Lymphocytes                                             | 3.0E-03 | 0.133 | 75 LPS/L-1 Mediated Inhibition of RXR Function                                    | 4.5E-02 | 0.096 |
| 35 Eicosanoid Signaling                                                        | 3.2E-03 | 0.145 | 76 Glycine, Serine and Threonine Metabolism                                       | 4.6E-02 | 0.062 |
| 36 Acute Phase Response Signaling                                              | 3.5E-03 | 0.135 | 77 IL-10 Signaling                                                                | 4.6E-02 | 0.128 |
| 37 Production of Nitric Oxide and Reactive Oxygen Species in Macrophages       | 4.0E-03 | 0.118 | 78 Erythropoietin Signaling                                                       | 4.6E-02 | 0.128 |
| 38 Type I Diabetes Mellitus Signaling                                          | 4.0E-03 | 0.140 | 79 Cell Cycle Regulation by BTG Family Proteins                                   | 4.7E-02 | 0.167 |
| 39 Thrombopoietin Signaling                                                    | 4.5E-03 | 0.175 | 80 Virus Entry via Endocytic Pathways                                             | 4.9E-02 | 0.120 |
| 40 Primary Immunodeficiency Signaling                                          | 4.9E-03 | 0.143 | 81 Apoptosis Signaling                                                            | 4.9E-02 | 0.125 |
| 41 TREM1 Signaling                                                             | 6.5E-03 | 0.152 |                                                                                   |         |       |
